# Supplementary material for: The Groucho Co-repressor Is Primarily Recruited to Local Target Sites in Active Chromatin to Attenuate Transcription
Source: PubMed Central journal article supplement (PMC4148212; doi:10.1371/journal.pgen.1004595), 2014-08-28

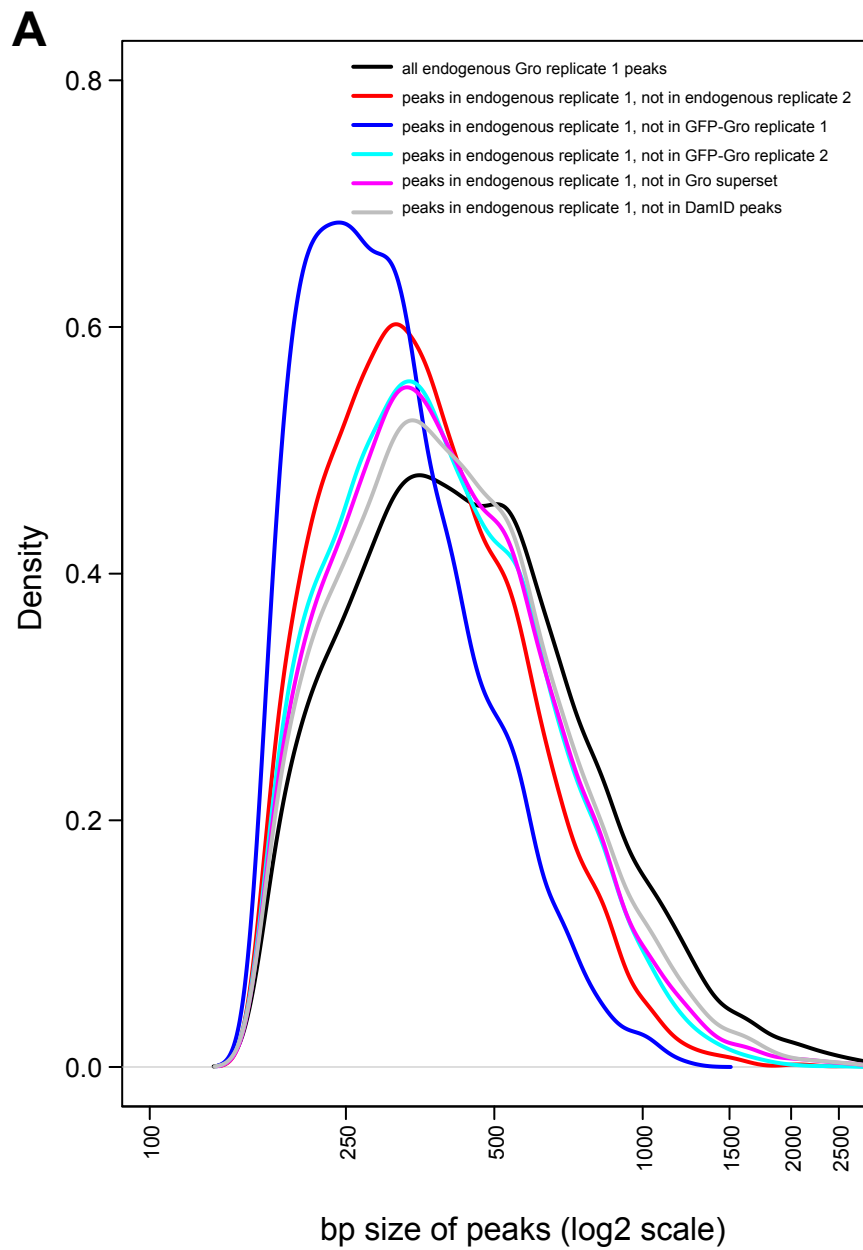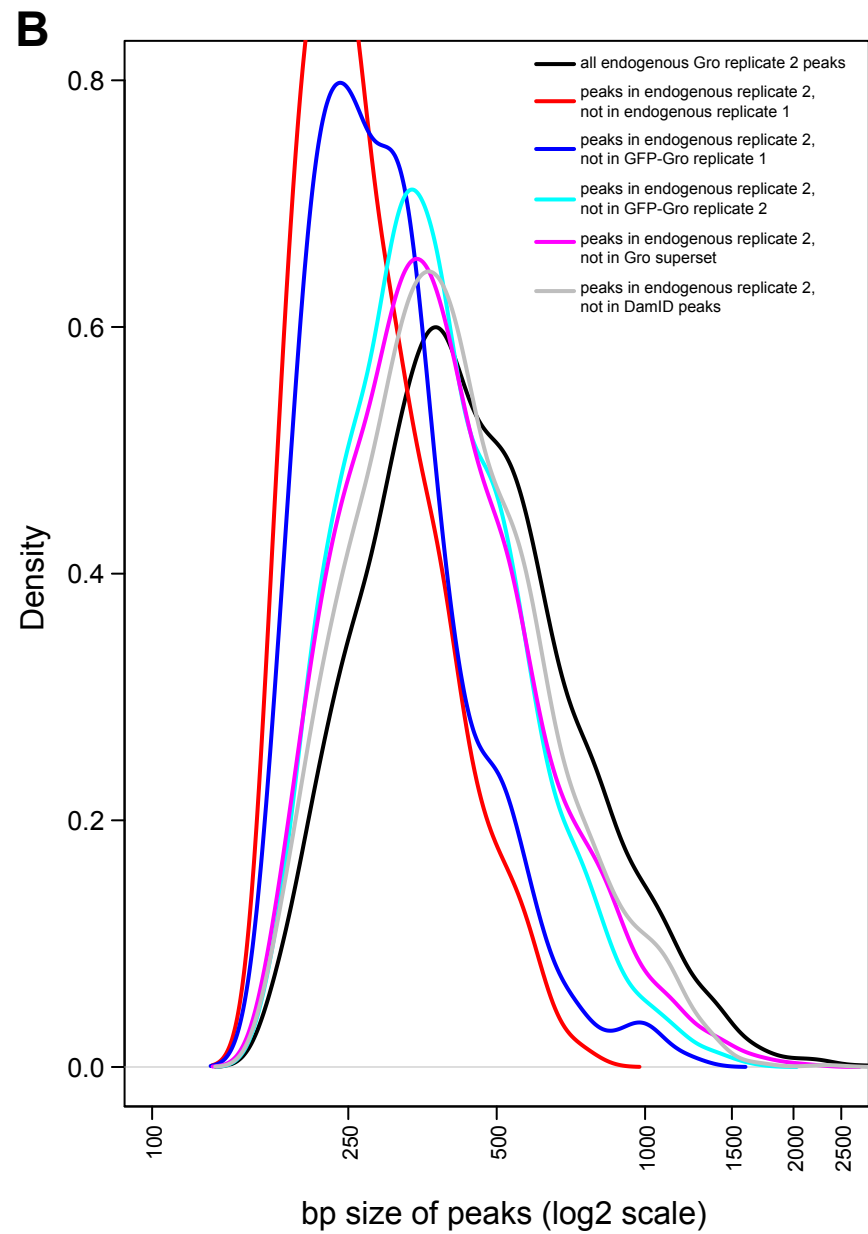

Supplement: pgen.1004595.s001.pdf [file pgen.1004595.s001.pdf]
