# Supplementary material for: The Groucho Co-repressor Is Primarily Recruited to Local Target Sites in Active Chromatin to Attenuate Transcription
Source: PLoS Genet. 2014 Aug 28;10(8):e1004595. doi: 10.1371/journal.pgen.1004595 (PMC4148212; doi:10.1371/journal.pgen.1004595)
Supplement: Table S5 — Comparison of gene expression via RNA-seq analysis of Kc167 cells expressing Gro-GFP and L38D,L87D-GFP. (XLSX) [file pgen.1004595.s016.xlsx]

## Sheet: kc_rna_seq_wtVSmut.txt
flybase_id	gene_id	symbol	logFC	logCPM	LR	PValue	Adjusted Pvalue
FBgn0000008	43852	a	-0.382238	2.23987	1.07586	0.299625	0.755028
FBgn0000017	45821	Abl	-0.113308	6.80489	0.941919	0.331785	0.777485
FBgn0000018	44793	abo	-0.0876867	4.67048	0.347564	0.555496	0.889891
FBgn0000032	48445	Acph-1	-0.210704	4.71742	2.06273	0.150939	0.628098
FBgn0000036	42918	nAcRalpha-96Aa	-0.126518	3.06298	0.242916	0.622108	0.906903
FBgn0000042	31521	Act5C	0.336751	12.7716	0.462359	0.496524	0.86456
FBgn0000043	35526	Act42A	-0.084505	9.47018	0.209252	0.647354	0.915564
FBgn0000052	33847	ade2	-0.169349	6.06006	2.11759	0.145615	0.619802
FBgn0000053	33986	ade3	-0.204195	6.10926	2.88679	0.0893086	0.540606
FBgn0000054	47082	Adf1	-0.151296	5.8405	1.81165	0.178311	0.659607
FBgn0000057	37073	adp	-0.0756032	5.67396	0.449643	0.502504	0.868948
FBgn0000063	42126	ald	0.0501711	4.86576	0.125817	0.722809	0.940576
FBgn0000064	43183	Ald	0.0623833	10.0149	0.0726016	0.787586	0.956622
FBgn0000071	40831	Ama	0.159746	3.03269	0.399396	0.527401	0.878527
FBgn0000077	43869	amx	0.0467785	3.80897	0.0612499	0.804531	0.961653
FBgn0000083	42492	AnnIX	-0.0159785	9.30319	0.00862575	0.926003	0.985787
FBgn0000084	33019	AnnX	-0.00549964	6.492	0.00186196	0.965582	0.994076
FBgn0000092	31252	CG2650	-0.0149558	2.15361	0.00177749	0.966371	0.994076
FBgn0000097	33392	aop	0.0746991	6.75881	0.394895	0.529738	0.878667
FBgn0000100	40451	RpLP0	0.0190624	11.7247	0.00235023	0.961334	0.994076
FBgn0000108	31002	Appl	-0.199676	3.52393	0.945232	0.330936	0.776738
FBgn0000109	48224	Aprt	0.29629	4.87908	4.39406	0.0360643	0.386572
FBgn0000115	39745	Arf72A	0.129598	5.20563	0.936158	0.333268	0.779488
FBgn0000116	39041	Argk	0.0341097	6.54025	0.0817435	0.774948	0.954318
FBgn0000117	31151	arm	-0.25258	7.6944	5.18673	0.02276	0.320924
FBgn0000119	44279	arr	-0.0752603	4.30008	0.170146	0.679982	0.924811
FBgn0000139	42936	ash2	-0.122495	6.41651	1.05864	0.303525	0.757634
FBgn0000140	42946	asp	-0.108835	5.37548	0.791439	0.373665	0.803077
FBgn0000146	34524	aub	-0.417118	4.4459	7.08054	0.00779253	0.202086
FBgn0000147	41446	aur	-0.190346	4.91242	1.96332	0.161158	0.643045
FBgn0000150	43739	awd	-0.0187638	9.48321	0.0101445	0.919773	0.984656
FBgn0000152	32645	Axs	-0.0903113	2.55593	0.0928697	0.76056	0.94865
FBgn0000158	43038	bam	-0.0653817	6.58886	0.296887	0.585841	0.899319
FBgn0000163	32703	baz	0.0646749	5.60158	0.252919	0.615027	0.90443
FBgn0000173	32358	ben	0.19585	8.43564	2.56477	0.109268	0.575011
FBgn0000180	34330	bib	0.585332	1.09324	1.40157	0.236461	0.711889
FBgn0000181	45827	bic	0.00380812	11.4607	0.000107831	0.991715	0.997247
FBgn0000183	35051	BicD	0.0219291	4.91818	0.0253063	0.873606	0.977307
FBgn0000210	44505	br	-0.046053	7.30544	0.151146	0.697443	0.932152
FBgn0000212	39744	brm	-0.101984	6.92862	0.824341	0.363914	0.797773
FBgn0000221	31358	brn	-0.0748536	4.95858	0.290692	0.589778	0.899319
FBgn0000228	33757	Bsg25D	0.11238	4.72646	0.565992	0.451856	0.843729
FBgn0000229	44801	bsk	0.0674891	5.25297	0.298165	0.585035	0.899275
FBgn0000239	45830	bur	-0.148297	6.7031	1.6061	0.20504	0.683721
FBgn0000242	32846	Bx	0.080916	4.02294	0.214952	0.642913	0.914489
FBgn0000244	41144	by	-0.378873	5.01882	7.7477	0.00537809	0.160929
FBgn0000246	47765	c(3)G	0.192713	4.65462	1.6797	0.194965	0.678891
FBgn0000247	43518	ca	-0.101166	5.3262	0.672819	0.41207	0.824476
FBgn0000250	34969	cact	0.0928416	6.95735	0.695396	0.404335	0.819424
FBgn0000253	36329	Cam	0.480699	12.0479	1.28354	0.257241	0.727756
FBgn0000256	33611	capu	-0.205735	3.74926	0.909008	0.340378	0.78397
FBgn0000257	32947	car	0.00304936	6.30303	0.000633644	0.979918	0.995542
FBgn0000259	32132	CkIIbeta	0.388422	9.0829	5.89543	0.0151802	0.271737
FBgn0000261	40048	Cat	-0.227865	6.94044	4.09387	0.043039	0.416908
FBgn0000273	34284	Pka-C1	0.481641	6.6796	11.4991	0.000696308	0.0462596
FBgn0000283	41848	Cp190	0.0497381	7.09108	0.198218	0.656163	0.917115
FBgn0000286	33692	Cf2	0.244988	4.58663	2.01243	0.156015	0.63694
FBgn0000289	36571	cg	-0.0691874	7.86805	0.356316	0.550559	0.886339
FBgn0000299	33727	Cg25C	0.0352781	9.48851	0.0358693	0.849786	0.969894
FBgn0000307	34974	chif	-0.0609813	5.26772	0.242671	0.622284	0.906944
FBgn0000308	33834	chic	0.343605	11.383	0.910292	0.340037	0.78397
FBgn0000313	43690	chp	-0.299625	3.29999	1.32661	0.249409	0.721485
FBgn0000317	34882	ck	-0.437307	4.75753	8.87419	0.0028923	0.111046
FBgn0000318	43938	cl	0.311827	6.20524	5.89549	0.0151797	0.271737
FBgn0000319	32537	Chc	-0.134514	8.79342	0.870308	0.35087	0.789722
FBgn0000326	117300	clt	-0.0434068	4.76346	0.0904205	0.763643	0.94865
FBgn0000330	31647	cm	0.109289	4.00234	0.373755	0.540965	0.883142
FBgn0000339	34967	cni	0.00195993	6.35948	0.000258503	0.987172	0.996417
FBgn0000346	47091	comt	-0.409826	3.90508	3.66466	0.055578	0.460354
FBgn0000351	33937	cort	-0.0320046	1.76476	0.00692163	0.933695	0.987503
FBgn0000352	35653	cos	-0.232463	5.69368	4.35246	0.0369555	0.389641
FBgn0000370	47767	crc	-0.0193423	10.508	0.00496686	0.943815	0.989853
FBgn0000376	31268	crm	-0.363118	4.76302	6.21579	0.0126616	0.255301
FBgn0000377	31208	crn	-0.0541206	5.27641	0.19781	0.656494	0.917195
FBgn0000382	45278	csw	0.0860189	6.16201	0.406649	0.523675	0.876337
FBgn0000384	3355131	cta	0.0770894	4.19067	0.206338	0.649653	0.915564
FBgn0000394	44510	cv	-0.204745	5.12395	2.54729	0.110483	0.57506
FBgn0000395	45280	cv-2	0.139261	6.15194	1.42509	0.232567	0.707421
FBgn0000404	39340	CycA	0.0168006	7.45499	0.0218109	0.882591	0.979488
FBgn0000405	37618	CycB	-0.0555673	7.08376	0.259109	0.610733	0.903147
FBgn0000406	35008	Cyt-b5-r	-0.0555982	1.7395	0.0205007	0.886148	0.979913
FBgn0000409	34996	Cyt-c-p	-0.00345427	8.01648	0.000989998	0.974899	0.994076
FBgn0000412	41095	D1	0.265536	8.57355	4.14409	0.0417801	0.413122
FBgn0000413	34413	da	0.154143	6.81275	1.83873	0.175099	0.658465
FBgn0000414	39866	Dab	-0.12089	5.91646	1.07056	0.300819	0.755507
FBgn0000416	43662	Sap-r	-0.053155	9.01152	0.113875	0.735774	0.941672
FBgn0000426	36314	SmF	0.0976702	6.03971	0.518362	0.471541	0.85538
FBgn0000447	41022	Dhod	0.013789	6.20635	0.0127947	0.90994	0.984656
FBgn0000454	48450	Dip-B	-0.142715	8.28658	1.49694	0.221143	0.694874
FBgn0000455	47769	Dip-C	-0.0706083	5.47644	0.31504	0.574604	0.896288
FBgn0000464	35259	Lar	0.00612984	5.85268	0.0024301	0.960683	0.994076
FBgn0000473	35587	Cyp6a2	0.0950202	5.97352	0.638002	0.424435	0.829096
FBgn0000479	31309	dnc	0.284341	6.28968	5.14962	0.0232515	0.32303
FBgn0000482	31118	dor	-0.252942	4.97641	3.35407	0.0670389	0.492464
FBgn0000489	39733	Pka-C3	0.441328	2.06083	1.57385	0.209648	0.686743
FBgn0000499	32078	dsh	0.0135635	6.32616	0.0127923	0.909949	0.984656
FBgn0000504	40940	dsx	-0.0991154	1.32557	0.041601	0.838382	0.966539
FBgn0000520	31265	dwg	0.0874666	4.74409	0.344773	0.557087	0.889891
FBgn0000524	31589	dx	-0.231881	5.21197	3.47787	0.0621949	0.479621
FBgn0000533	41858	ea	-0.440928	3.67192	5.02839	0.0249351	0.329761
FBgn0000536	32585	eas	-0.181393	4.99675	1.83829	0.175151	0.658465
FBgn0000541	44811	E(bx)	-0.0212357	6.60069	0.0325108	0.856911	0.972429
FBgn0000543	38291	ecd	0.108155	5.4942	0.831868	0.361733	0.79689
FBgn0000546	35540	EcR	0.475519	2.71872	2.47829	0.115428	0.583111
FBgn0000547	33619	ed	-0.270281	2.65521	0.86547	0.352213	0.790246
FBgn0000556	36271	Ef1alpha48D	-0.161803	14.0825	0.0689726	0.792839	0.957246
FBgn0000557	43736	Ef1alpha100E	-0.0857867	5.42564	0.463189	0.496138	0.86456
FBgn0000559	35422	Ef2b	-0.149629	13.7651	0.0652355	0.798405	0.959579
FBgn0000562	37757	egl	-0.0928155	5.12051	0.496882	0.480873	0.858694
FBgn0000565	39675	Eip71CD	0.0880328	7.07438	0.643352	0.4225	0.828519
FBgn0000566	37143	Eip55E	0.100114	8.47094	0.652958	0.419057	0.828345
FBgn0000567	39962	Eip74EF	-0.0792269	4.75607	0.285823	0.59291	0.900311
FBgn0000568	39999	Eip75B	0.396031	6.27271	10.6144	0.00112209	0.0584039
FBgn0000575	38091	emc	0.225675	6.14483	3.57651	0.0586022	0.470273
FBgn0000578	37201	ena	0.228054	6.41925	2.4109	0.120493	0.588184
FBgn0000579	33351	Eno	0.0197911	9.91571	0.00809037	0.92833	0.986526
FBgn0000581	36238	E(Pc)	0.0339655	6.94152	0.0746287	0.784713	0.956101
FBgn0000588	34595	esc	-0.235421	4.81622	2.43688	0.118511	0.58576
FBgn0000611	32567	exd	0.0383884	5.55945	0.100402	0.751348	0.945967
FBgn0000615	37345	exu	-0.200496	4.501	1.73589	0.187661	0.670373
FBgn0000617	32762	e(y)1	0.224382	5.4799	3.5652	0.0590025	0.471814
FBgn0000618	45848	e(y)2	0.0175613	4.26646	0.0119195	0.913063	0.984656
FBgn0000629	39203	E(z)	-0.237239	5.19585	3.50774	0.0610829	0.478072
FBgn0000633	36521	fas	-0.481076	2.20322	2.00805	0.156466	0.63694
FBgn0000635	31364	Fas2	-0.835335	4.06896	14.8261	0.000117893	0.0174269
FBgn0000644	31294	Fcp3C	0.026795	4.62636	0.0302786	0.86186	0.97435
FBgn0000659	43383	fkh	0.000696031	4.66097	1.86615e-05	0.996553	0.998813
FBgn0000662	36527	fl(2)d	0.0124426	6.42571	0.0105752	0.918093	0.984656
FBgn0000667	31166	Actn	-0.00567142	5.56432	0.00253602	0.959836	0.994076
FBgn0000709	33110	fliI	-0.118637	6.41347	0.940874	0.332053	0.777632
FBgn0000711	44289	flw	0.339459	6.61712	8.64932	0.00327183	0.118254
FBgn0000719	33148	fog	-0.0240495	6.32956	0.0363523	0.84879	0.969894
FBgn0000721	44817	for	-0.0482338	4.93638	0.126433	0.722159	0.940359
FBgn0000723	41118	Fps85D	0.283165	4.95438	3.84569	0.049874	0.442124
FBgn0000808	32159	gd	-0.339381	2.17811	0.992237	0.319196	0.769428
FBgn0000810	47781	fs(1)K10	0.214317	4.48715	1.97502	0.159916	0.641385
FBgn0000826	31084	png	0.0835239	4.53341	0.290826	0.589692	0.899319
FBgn0000927	31263	fs(1)Ya	-0.288452	3.85413	2.46109	0.116698	0.584359
FBgn0000928	31262	fs(1)Yb	-0.0179432	4.57411	0.013154	0.90869	0.984656
FBgn0000996	47121	dup	-0.169153	7.50437	2.14879	0.142682	0.616785
FBgn0001078	40045	ftz-f1	0.172901	6.94965	1.84515	0.174348	0.658046
FBgn0001079	32855	fu	-0.231194	4.83202	2.68555	0.101262	0.560642
FBgn0001084	34166	fy	-0.410911	1.1556	0.575381	0.448129	0.841708
FBgn0001085	45307	fz	-0.341811	1.39282	0.542039	0.461589	0.850986
FBgn0001086	34968	fzy	-0.127948	6.08425	1.21796	0.269761	0.73729
FBgn0001087	44819	g	0.272386	6.65094	4.85118	0.0276272	0.342031
FBgn0001091	35728	Gapdh1	0.0955366	9.46645	0.268465	0.604363	0.902434
FBgn0001092	32545	Gapdh2	-0.143099	9.73983	0.480197	0.488333	0.863151
FBgn0001098	42832	Gdh	0.00270187	8.25531	0.000537062	0.981511	0.996417
FBgn0001104	38765	G-ialpha65A	0.138578	7.14698	1.36171	0.243241	0.717397
FBgn0001105	32544	Gbeta13F	0.394601	10.4673	2.1263	0.14479	0.618938
FBgn0001108	39536	Gl	-0.0159996	6.10645	0.0120355	0.912642	0.984656
FBgn0001114	34193	Glt	0.000207292	7.66429	3.14061e-06	0.998586	0.999533
FBgn0001122	36104	G-oalpha47A	0.453655	7.56752	16.675	4.43615e-05	0.00886152
FBgn0001123	37805	G-salpha60A	0.11907	6.18645	1.06687	0.301654	0.756252
FBgn0001124	36782	Got1	-0.0293331	7.46888	0.0707823	0.790201	0.956844
FBgn0001125	33373	Got2	0.058568	6.82778	0.268137	0.604584	0.902434
FBgn0001128	33824	Gpdh	0.0612285	4.83774	0.170452	0.67971	0.924811
FBgn0001133	45871	grau	-0.0399954	4.93328	0.0883034	0.766345	0.949708
FBgn0001137	34171	grk	-0.0292602	5.33355	0.0504271	0.822322	0.962505
FBgn0001139	43162	gro	0.789971	10.7825	6.8411	0.00890842	0.215732
FBgn0001142	33172	Gs1	0.0904916	6.69704	0.586766	0.443673	0.839802
FBgn0001145	32087	Gs2	0.326711	6.45565	7.09349	0.00773645	0.201495
FBgn0001149	41503	GstD1	-0.0161804	9.01597	0.0111404	0.915941	0.984656
FBgn0001168	38995	h	0.426958	8.89181	8.64482	0.00327993	0.118254
FBgn0001169	42445	H	-0.191079	5.8107	2.90915	0.0880785	0.539163
FBgn0001179	39202	hay	0.0279925	5.09866	0.0489645	0.824875	0.962655
FBgn0001185	34992	her	0.171075	4.44663	1.16056	0.28135	0.74507
FBgn0001186	45875	Hex-A	0.391421	9.0481	5.85615	0.0155227	0.273291
FBgn0001189	31120	hfw	-0.220964	5.83072	4.14768	0.0416916	0.41306
FBgn0001197	43229	His2Av	0.239953	9.8938	1.20153	0.273017	0.739487
FBgn0001202	35169	hk	0.0111834	5.99658	0.00914815	0.923802	0.985397
FBgn0001206	31988	Hmr	-0.198088	4.95403	1.94196	0.163455	0.646829
FBgn0001215	43385	Hrb98DE	0.149652	9.97515	0.438744	0.507729	0.870881
FBgn0001218	32133	Hsc70-3	0.195545	9.85715	0.76485	0.381815	0.805337
FBgn0001219	41840	Hsc70-4	-0.0375688	11.8185	0.00877422	0.925371	0.985787
FBgn0001220	36583	Hsc70-5	-0.0168508	9.42677	0.00864114	0.925937	0.985787
FBgn0001222	37068	Hsf	-0.128158	5.99519	1.17435	0.278509	0.74507
FBgn0001224	39077	Hsp23	0.0212794	8.46376	0.0279755	0.867166	0.975407
FBgn0001225	39075	Hsp26	0.172113	8.28471	2.13871	0.143622	0.617878
FBgn0001226	39078	Hsp27	0.406221	8.53899	8.65177	0.00326744	0.118254
FBgn0001227	39076	Hsp67Ba	-0.110927	3.24361	0.237998	0.625656	0.908313
FBgn0001229	39071	Hsp67Bc	0.201452	3.72979	1.09747	0.294822	0.751982
FBgn0001230	42852	Hsp68	0.153616	7.50865	1.96712	0.160754	0.643045
FBgn0001233	38389	Hsp83	0.0974257	11.6482	0.0635819	0.800922	0.959653
FBgn0001234	3772547	Hsromega	0.323734	6.78657	7.99184	0.00469887	0.148418
FBgn0001247	40248	Ide	-0.179197	6.99186	2.57859	0.108318	0.575011
FBgn0001248	44291	Idh	-0.0669555	8.85866	0.218426	0.640242	0.914489
FBgn0001257	38513	ImpL2	0.232439	9.41671	1.6335	0.20122	0.681459
FBgn0001258	45880	ImpL3	0.00881493	9.80993	0.00173891	0.966738	0.994076
FBgn0001276	45881	ix	0.0606028	4.22816	0.11037	0.739724	0.943368
FBgn0001280	43569	janA	0.105284	6.20824	0.745827	0.387801	0.809763
FBgn0001291	36057	Jra	-0.244833	6.18018	4.37568	0.0364553	0.386572
FBgn0001296	45883	kar	-0.0783399	4.44322	0.142143	0.706159	0.93541
FBgn0001297	3772082	kay	0.255977	7.86754	5.04274	0.0247294	0.329761
FBgn0001301	35084	kel	-0.169204	5.47295	1.80329	0.179315	0.660365
FBgn0001308	36810	Khc	-0.0611045	7.35438	0.283181	0.594624	0.900767
FBgn0001316	38067	klar	-0.105427	7.75752	0.85679	0.354639	0.791869
FBgn0001324	44830	kto	-0.0858469	6.85629	0.50854	0.475772	0.856385
FBgn0001330	31205	kz	-0.18663	3.52419	0.814416	0.366818	0.800254
FBgn0001332	44831	L	-0.0337797	6.35425	0.0632149	0.801485	0.959653
FBgn0001337	47141	Exp6	-0.029947	5.39454	0.0593069	0.807595	0.961904
FBgn0001341	31010	l(1)1Bi	-0.0508243	4.37443	0.0978017	0.754484	0.94696
FBgn0001404	31239	egh	0.119351	7.47948	1.09899	0.294489	0.751982
FBgn0001491	32069	l(1)10Bb	-0.00417683	5.74518	0.00145705	0.969551	0.994076
FBgn0001565	33118	Hlc	-0.00970786	8.55914	0.00543092	0.941253	0.989773
FBgn0001612	48481	l(1)dd4	-0.128502	4.67778	0.775384	0.378557	0.805337
FBgn0001624	32083	dlg1	0.0316256	7.05906	0.0782423	0.779694	0.955404
FBgn0001941	33836	ifc	-0.0218234	7.96993	0.0374867	0.846477	0.969894
FBgn0001942	33835	eIF-4a	-0.010253	11.7593	0.000669326	0.97936	0.995113
FBgn0001961	34793	Arpc1	0.0354382	8.13581	0.0987667	0.753315	0.946484
FBgn0001965	34790	Sos	-0.103687	5.79103	0.898644	0.343145	0.786737
FBgn0001974	34877	l(2)35Bd	0.0643127	3.47351	0.0955995	0.757176	0.948118
FBgn0001977	49424	l(2)35Bg	0.0446955	5.2045	0.130408	0.718009	0.938067
FBgn0001978	34888	stc	-0.0244962	7.60533	0.047691	0.827131	0.963943
FBgn0001986	48782	l(2)35Df	-0.219214	5.24429	2.62511	0.105185	0.568034
FBgn0001987	34927	Gli	-0.297059	3.56351	2.12189	0.145207	0.619363
FBgn0001989	34925	l(2)35Di	0.061124	5.68306	0.299816	0.583998	0.898468
FBgn0001990	48785	wek	-0.0394354	4.08183	0.0488772	0.825029	0.962655
FBgn0001992	49165	Cyp303a1	-1.17376	1.20392	5.41575	0.0199558	0.304111
FBgn0001994	34956	crp	0.0303314	6.80081	0.0585537	0.808797	0.962102
FBgn0001995	49425	mRpL4	-0.0179015	4.66178	0.0127338	0.910154	0.984656
FBgn0002021	49427	l(2)37Bb	-0.184466	5.21948	2.21141	0.136994	0.608852
FBgn0002022	48805	Catsup	-0.222268	6.55555	3.15798	0.0755567	0.517922
FBgn0002031	49168	l(2)37Cc	-0.0769156	8.93741	0.261757	0.608916	0.902757
FBgn0002036	35189	CG10561	0.100703	3.06331	0.166808	0.682964	0.926223
FBgn0002044	35235	swm	0.026264	7.21458	0.0560852	0.812794	0.962102
FBgn0002069	36420	Aats-asp	-0.0879867	9.43792	0.233291	0.629094	0.909271
FBgn0002174	48844	l(2)tid	0.276771	5.95571	4.95981	0.0259431	0.334051
FBgn0002183	38248	dre4	-0.0940874	8.51933	0.560573	0.454029	0.844827
FBgn0002283	48903	l(3)73Ah	0.216444	5.76566	3.89222	0.0485103	0.439031
FBgn0002284	39855	Pros26	0.0397225	7.78336	0.125196	0.723466	0.940898
FBgn0002354	49762	l(3)87Df	0.213453	3.18867	0.835855	0.360585	0.795778
FBgn0002413	43673	dco	0.308165	7.11941	7.0921	0.00774245	0.201495
FBgn0002431	41181	hyd	-0.159579	6.38466	1.65249	0.19862	0.680172
FBgn0002441	43288	l(3)mbt	-0.0915053	6.45215	0.602086	0.437783	0.838573
FBgn0002466	39429	sti	-0.366495	6.69685	9.99451	0.00157008	0.0739138
FBgn0002521	43819	pho	0.245943	4.68223	2.71851	0.0991909	0.55771
FBgn0002524	34910	lace	-0.136889	7.28888	1.29128	0.255812	0.726763
FBgn0002525	33782	Lam	0.075108	7.66663	0.369162	0.543461	0.884821
FBgn0002526	38723	LanA	-0.204715	11.0837	0.384354	0.535282	0.880585
FBgn0002528	39118	LanB2	-0.120489	9.74272	0.319116	0.572139	0.895621
FBgn0002534	35819	Lcp3	0.21978	2.47324	0.479723	0.488548	0.863151
FBgn0002542	45894	lds	-0.247193	5.54866	4.24759	0.0393061	0.40237
FBgn0002543	44522	lea	1.61021	1.55425	12.887	0.000330875	0.0309557
FBgn0002552	45325	lin	-0.288142	5.48646	5.80705	0.015962	0.276267
FBgn0002563	33274	Lsp1beta	-0.308347	1.64477	0.557663	0.455203	0.845541
FBgn0002566	3355130	lt	-0.0155702	6.71067	0.017388	0.895092	0.982322
FBgn0002567	35940	ltd	0.454411	3.31173	4.21932	0.0399662	0.405327
FBgn0002579	31009	RpL36	0.0364585	10.9719	0.0130123	0.909181	0.984656
FBgn0002590	32700	RpS5a	0.0989374	11.7144	0.0638804	0.800465	0.959579
FBgn0002593	33214	RpLP1	0.147632	11.54	0.15303	0.695656	0.93134
FBgn0002607	37995	RpL19	0.031282	11.2328	0.00824075	0.927669	0.98639
FBgn0002622	42761	RpS3	0.0604279	11.7802	0.0231031	0.879189	0.977812
FBgn0002626	43573	RpL32	0.138208	11.5324	0.136438	0.711848	0.937213
FBgn0002638	38669	Bj1	0.1108	8.75083	0.6344	0.425746	0.829433
FBgn0002641	33045	mal	-0.212578	5.3427	2.47968	0.115326	0.583111
FBgn0002643	36555	mam	-0.183882	6.87005	2.38327	0.122641	0.59013
FBgn0002645	43765	Map205	0.144843	7.47607	1.72063	0.189612	0.672467
FBgn0002652	2768920	squ	0.0584271	5.23757	0.188243	0.664383	0.920348
FBgn0002673	34954	twe	0.173251	2.38624	0.31335	0.575632	0.896288
FBgn0002707	31373	mei-9	-0.362365	4.83425	4.15419	0.0415316	0.412088
FBgn0002709	3772646	mei-218	0.82875	1.47818	3.37729	0.0661006	0.489529
FBgn0002715	37523	mei-S332	0.092521	3.66876	0.19495	0.658828	0.918189
FBgn0002719	47173	Men	-0.157628	9.24286	0.872418	0.350287	0.7893
FBgn0002723	32114	Met	0.0522982	5.24121	0.173604	0.676928	0.92379
FBgn0002732	43153	E(spl)malpha-BFM	0.865544	1.26782	3.16508	0.0752288	0.517922
FBgn0002733	43152	E(spl)mbeta-HLH	0.677521	4.0382	15.4757	8.35709e-05	0.0147065
FBgn0002736	37402	mago	-0.0503285	6.5658	0.187564	0.664952	0.920348
FBgn0002773	43587	Mlc2	-0.683628	1.80506	2.35004	0.12528	0.592414
FBgn0002774	35523	mle	-0.0907532	5.92937	0.583887	0.444793	0.839802
FBgn0002775	38779	msl-3	0.123838	3.86543	0.469493	0.49322	0.863373
FBgn0002778	39625	mnd	-0.0580571	6.49829	0.225869	0.634604	0.911103
FBgn0002780	43764	mod	0.0802942	8.09728	0.519609	0.471009	0.85538
FBgn0002781	49228	mod(mdg4)	-0.0854637	8.13621	0.572211	0.449382	0.842856
FBgn0002783	41942	mor	0.0341901	6.67519	0.0813114	0.775528	0.954685
FBgn0002787	37894	Mov34	-0.00143212	6.89414	0.000150752	0.990204	0.996417
FBgn0002791	45906	mr	-0.235684	4.38806	2.25771	0.132951	0.60137
FBgn0002868	41202	MtnA	-0.00150797	5.94162	0.000160962	0.989877	0.996417
FBgn0002872	38257	mu2	-0.0770063	5.9763	0.442221	0.506052	0.870806
FBgn0002873	44839	mud	-0.162298	6.43724	1.85209	0.173541	0.657091
FBgn0002878	48309	mus101	-0.215099	4.82088	2.029	0.154322	0.633665
FBgn0002891	47186	mus205	-0.250909	6.17466	4.28621	0.0384226	0.396508
FBgn0002899	38905	mus301	-0.340439	4.35462	4.64286	0.031183	0.360679
FBgn0002901	40003	mus304	-0.0276082	4.02992	0.025258	0.873726	0.977307
FBgn0002905	41571	mus308	-0.0870872	5.19209	0.393921	0.530246	0.878667
FBgn0002906	41366	Blm	-0.0169282	4.72883	0.0133337	0.908071	0.984656
FBgn0002914	32543	Myb	-0.0320622	7.09149	0.078603	0.7792	0.955404
FBgn0002921	48971	Atpalpha	0.03921	9.14626	0.0565832	0.81198	0.962102
FBgn0002924	43517	ncd	-0.0423788	7.30561	0.149537	0.698978	0.932854
FBgn0002932	41085	neur	-0.0373842	3.76149	0.0391014	0.843248	0.969276
FBgn0002945	44843	nkd	-0.101402	1.84604	0.0703633	0.790809	0.956844
FBgn0002948	32107	nod	-0.138209	3.30904	0.347105	0.555756	0.889891
FBgn0002968	NA	NA	0.23415	5.82057	4.45778	0.0347427	0.380857
FBgn0002973	34263	numb	0.133982	1.738	0.107503	0.743005	0.944145
FBgn0002989	33507	okr	-0.213787	4.20776	1.67222	0.195962	0.678891
FBgn0003008	43943	or	0.347755	3.98629	3.64966	0.0560807	0.461919
FBgn0003016	34850	osp	-0.192482	3.38596	0.777372	0.377946	0.805337
FBgn0003022	37090	Ote	-0.0788674	6.30298	0.426292	0.513814	0.873404
FBgn0003041	38879	pbl	-0.16405	6.1737	2.05632	0.151576	0.630089
FBgn0003042	40358	Pc	0.154465	3.3531	0.471025	0.492516	0.863373
FBgn0003044	37069	Pcl	-0.0821473	7.3907	0.547691	0.459263	0.848374
FBgn0003048	31204	pcx	-0.00990705	6.81374	0.00670739	0.934727	0.987503
FBgn0003053	31391	peb	0.0343964	1.28313	0.00484964	0.944481	0.989853
FBgn0003062	37662	Fib	0.178774	8.24783	2.39953	0.121372	0.58946
FBgn0003067	37131	Pepck	0.416176	6.27568	11.094	0.000866076	0.0523753
FBgn0003071	36060	Pfk	0.0090031	7.89673	0.00511642	0.942977	0.989773
FBgn0003074	35886	Pgi	-0.032435	7.83219	0.0805311	0.776579	0.955404
FBgn0003076	44010	Pgm	0.0755463	7.99635	0.479115	0.488823	0.863151
FBgn0003079	31221	phl	-0.133528	4.85171	0.880078	0.34818	0.787839
FBgn0003082	35735	phr	0.116257	5.89235	0.650184	0.420047	0.828519
FBgn0003087	34404	pim	-0.124241	3.14839	0.25063	0.616632	0.904576
FBgn0003093	43428	Pkc98E	-0.0164239	5.7804	0.0204169	0.886379	0.979913
FBgn0003116	31194	pn	-0.135494	3.79189	0.515364	0.472826	0.855467
FBgn0003118	42757	pnt	-0.0636383	7.7543	0.277104	0.598605	0.90125
FBgn0003124	40232	polo	-0.0654526	8.15714	0.324918	0.568667	0.89437
FBgn0003134	42922	Pp1alpha-96A	0.106796	7.02974	0.948949	0.329987	0.775398
FBgn0003137	43872	Ppn	-0.120291	7.75376	0.891439	0.345088	0.786737
FBgn0003138	38160	Ptp61F	0.0867494	7.2351	0.557956	0.455085	0.845534
FBgn0003139	31582	PpV	0.235403	6.46889	3.20041	0.0736197	0.511646
FBgn0003141	35292	pr	0.232124	5.97475	3.93786	0.0472109	0.437215
FBgn0003149	39002	Prm	0.0950212	1.03737	0.0305609	0.861224	0.97435
FBgn0003162	37415	Pu	-0.479281	3.16504	3.8899	0.0485774	0.439031
FBgn0003165	41094	pum	0.0572441	7.93363	0.246431	0.619599	0.905747
FBgn0003169	41772	put	-0.138509	5.58011	1.44374	0.229536	0.706008
FBgn0003175	37573	px	-0.042507	6.13844	0.136166	0.712122	0.937213
FBgn0003178	42620	PyK	0.0301589	9.05026	0.0376452	0.846157	0.969755
FBgn0003189	32640	r	-0.115466	6.03282	0.989496	0.319866	0.769572
FBgn0003204	43873	ras	-0.120743	5.58223	1.12284	0.289309	0.749956
FBgn0003205	41140	Ras85D	0.181886	7.90917	2.50677	0.113358	0.58102
FBgn0003206	38494	Ras64B	0.0976345	6.9946	0.7756	0.37849	0.805337
FBgn0003209	44851	raw	-0.129128	3.74623	0.368791	0.543664	0.884821
FBgn0003210	31381	rb	-0.0435566	6.68138	0.125701	0.722932	0.940576
FBgn0003218	32340	rdgB	-0.0933555	6.21102	0.514849	0.473047	0.855467
FBgn0003227	49241	rec	-0.304989	2.15463	0.813379	0.367123	0.800521
FBgn0003231	35246	ref(2)P	-0.145664	7.40585	1.69144	0.193412	0.678785
FBgn0003250	39887	Rh4	0.212875	3.05453	0.751651	0.385954	0.808244
FBgn0003256	3354888	rl	0.409179	5.17111	10.6867	0.00107907	0.057377
FBgn0003257	42493	r-l	-0.0864468	6.39512	0.528664	0.467169	0.85382
FBgn0003261	40739	Rm62	0.0244474	9.95438	0.0117926	0.913525	0.984656
FBgn0003268	43719	rod	-0.145574	5.82843	1.67854	0.195119	0.678891
FBgn0003274	36855	RpLP2	0.196929	11.3685	0.27242	0.601713	0.901768
FBgn0003275	48312	RpII18	0.129166	5.97928	0.960937	0.326951	0.773526
FBgn0003277	32100	RpII215	-0.228015	6.92628	4.15616	0.0414835	0.412088
FBgn0003278	33210	RpI135	0.0628159	4.92937	0.214168	0.64352	0.914489
FBgn0003279	43349	RpL4	0.0257639	12.2321	0.00340834	0.953445	0.991775
FBgn0003301	32406	rut	0.119783	3.4323	0.322217	0.570278	0.894949
FBgn0003302	31535	rux	-0.242884	3.14152	0.932514	0.334211	0.780655
FBgn0003308	41605	ry	-0.300531	4.55111	3.39009	0.0655895	0.487698
FBgn0003310	33281	S	0.135514	6.17332	1.15676	0.28214	0.74507
FBgn0003317	35731	sax	-0.228716	5.25485	3.11492	0.0775785	0.520784
FBgn0003321	43944	sbr	-0.320067	6.21877	6.17555	0.0129528	0.258043
FBgn0003328	36692	scb	0.0736754	3.13057	0.0940876	0.759044	0.94865
FBgn0003330	43327	Sce	-0.101381	4.74887	0.473469	0.491395	0.863373
FBgn0003334	41168	Scm	-0.151585	5.25369	1.49514	0.22142	0.695206
FBgn0003345	32536	sd	0.111579	7.85484	0.948879	0.330005	0.775398
FBgn0003346	35223	RanGap	0.0232334	6.66772	0.0376685	0.84611	0.969755
FBgn0003353	37843	sei	-0.0128266	4.02919	0.00432986	0.947536	0.990515
FBgn0003360	32007	sesB	0.0973205	9.45991	0.274855	0.600094	0.90125
FBgn0003371	31248	sgg	0.183229	7.86535	1.7563	0.185087	0.668342
FBgn0003390	31617	shf	-0.160541	3.00476	0.336918	0.561614	0.890557
FBgn0003391	37386	shg	-0.0808992	3.45608	0.141186	0.707105	0.935752
FBgn0003392	45928	shi	-0.0709574	6.40742	0.34454	0.55722	0.889891
FBgn0003396	36171	shn	0.0103569	6.76551	0.00729173	0.93195	0.987503
FBgn0003401	45360	shu	-0.0515194	4.89562	0.10671	0.743921	0.944145
FBgn0003410	39884	sina	0.137991	6.45489	1.34133	0.246799	0.718995
FBgn0003415	43906	skd	-0.1269	6.97548	1.07856	0.29902	0.755028
FBgn0003416	32601	sl	-0.203413	5.0295	2.11501	0.145861	0.619802
FBgn0003423	33117	slgA	-0.0453041	2.00378	0.0159851	0.89939	0.983778
FBgn0003435	37254	sm	-0.0561815	3.17335	0.0585492	0.808804	0.962102
FBgn0003444	33196	smo	-0.179036	4.53499	0.908629	0.340478	0.78397
FBgn0003447	31717	sn	0.188105	2.32799	0.333981	0.563324	0.891501
FBgn0003449	31442	snf	0.139299	6.4632	1.39311	0.237881	0.714122
FBgn0003459	39581	stwl	-0.0591532	4.43805	0.131981	0.716387	0.938067
FBgn0003462	39251	Sod	-0.0751279	8.02361	0.466111	0.494782	0.864393
FBgn0003464	44014	sol	-0.140566	8.03569	1.52656	0.21663	0.690978
FBgn0003475	45931	spir	0.124519	4.83372	0.530337	0.466465	0.853627
FBgn0003479	43577	spn-A	0.0863972	4.79871	0.378778	0.538258	0.881599
FBgn0003480	41746	spn-B	-0.071292	2.84337	0.0726185	0.787562	0.956622
FBgn0003482	318579	spn-D	-0.203546	1.28908	0.191221	0.661903	0.919724
FBgn0003483	41919	spn-E	-0.434957	4.95322	10.0236	0.00154548	0.0732221
FBgn0003495	43256	spz	0.192273	6.22661	2.43727	0.118483	0.58576
FBgn0003502	34132	Btk29A	0.159027	5.11371	1.5655	0.210861	0.686793
FBgn0003507	41944	srp	-0.0192307	8.14224	0.0280914	0.866894	0.975407
FBgn0003510	43571	Sry-alpha	-0.692366	2.85239	3.74624	0.0529266	0.448601
FBgn0003511	43570	Sry-beta	0.060742	4.46982	0.142573	0.705737	0.935172
FBgn0003512	43572	Sry-delta	0.00139884	5.39449	0.000132893	0.990802	0.9966
FBgn0003514	31554	sqh	0.130287	9.26397	0.591392	0.441881	0.839575
FBgn0003517	31106	sta	0.0442029	12.3644	0.00956408	0.922094	0.984719
FBgn0003520	37065	stau	0.134538	7.07746	1.49033	0.222165	0.69533
FBgn0003525	43466	stg	0.252665	7.1313	5.25877	0.0218365	0.317983
FBgn0003527	36380	stil	0.0826146	3.01695	0.107247	0.7433	0.944145
FBgn0003545	44870	sub	-0.0916622	5.61805	0.666346	0.414328	0.825586
FBgn0003557	33379	Su(dx)	-0.158743	6.24379	1.55974	0.211703	0.686793
FBgn0003559	3354994	su(f)	-0.307192	5.87243	6.68381	0.00972923	0.222981
FBgn0003567	41740	su(Hw)	-0.162479	5.62303	1.88915	0.169298	0.651937
FBgn0003575	31012	su(s)	-0.212955	5.63152	3.39638	0.0653397	0.487175
FBgn0003598	41627	Su(var)3-7	-0.179954	5.29588	2.13204	0.144248	0.61841
FBgn0003607	34119	Su(var)205	0.205885	7.33201	3.37968	0.0660049	0.489384
FBgn0003612	35927	Su(var)2-10	-0.0854597	6.37987	0.493067	0.482562	0.859841
FBgn0003638	31054	su(w[a])	0.0044284	7.3168	0.00161337	0.96796	0.994076
FBgn0003654	44160	sw	0.232448	4.68545	1.45839	0.227186	0.703277
FBgn0003655	31580	swa	-0.355896	4.49708	5.36508	0.0205439	0.307991
FBgn0003656	31716	sws	-0.010183	6.02554	0.00720902	0.932336	0.987503
FBgn0003660	36080	Syb	0.188119	8.23114	2.54174	0.110873	0.57506
FBgn0003676	42649	T-cp1	0.0161071	8.08758	0.020889	0.885082	0.979913
FBgn0003687	37476	Tbp	0.0129111	4.8949	0.00768393	0.930148	0.987323
FBgn0003701	37042	thr	-0.305669	5.02849	5.28077	0.0215622	0.316202
FBgn0003714	31228	tko	-0.372741	2.33269	1.39384	0.237757	0.714122
FBgn0003716	33753	tkv	0.0324116	4.06693	0.0358519	0.849822	0.969894
FBgn0003721	41852	Tm1	0.334512	9.76328	2.57481	0.108577	0.575011
FBgn0003732	35225	Top2	-0.0374149	7.45628	0.0922603	0.761323	0.94865
FBgn0003741	39849	tra	-0.099016	4.51005	0.416849	0.518514	0.875193
FBgn0003742	36619	tra2	-0.180783	4.98414	1.84304	0.174594	0.658046
FBgn0003744	40165	trc	-0.0212962	5.86718	0.0363645	0.848765	0.969894
FBgn0003748	45368	Treh	0.0989494	5.88311	0.78189	0.376564	0.805319
FBgn0003751	34376	trk	-0.0450684	1.3066	0.00681667	0.934199	0.987503
FBgn0003862	41737	trx	-0.138333	7.10518	1.55212	0.212823	0.687488
FBgn0003870	48317	ttk	-0.0257852	7.17136	0.0535926	0.816926	0.962105
FBgn0003882	40554	tub	-0.040598	6.63344	0.118188	0.731008	0.941359
FBgn0003884	40848	alphaTub84B	0.129256	11.2768	0.137479	0.7108	0.937213
FBgn0003885	40904	alphaTub84D	0.229292	6.19708	3.93018	0.047427	0.437803
FBgn0003886	41183	alphaTub85E	0.915065	4.07902	24.9307	5.94274e-07	0.000627469
FBgn0003887	37238	betaTub56D	0.128643	10.4225	0.233129	0.629213	0.909271
FBgn0003888	37888	betaTub60D	0.179465	10.4196	0.455582	0.499696	0.865945
FBgn0003890	43359	betaTub97EF	-0.0174098	8.1128	0.0235762	0.877968	0.977812
FBgn0003891	37417	tud	-0.20331	8.30777	3.00381	0.0830692	0.531571
FBgn0003892	35851	ptc	0.0963604	3.72189	0.189431	0.66339	0.919724
FBgn0003930	3772712	snRNA:U4:39B	1.44961	2.40198	6.49871	0.0107953	0.23467
FBgn0003941	33629	RpL40	0.150317	10.9665	0.222492	0.637148	0.912097
FBgn0003942	34420	RpS27A	0.157881	11.2457	0.206199	0.649763	0.915564
FBgn0003943	38456	Ubi-p63E	1.12687	5.8664	13.9283	0.000189917	0.0227092
FBgn0003950	33093	unc	-0.185964	5.42329	2.35815	0.12463	0.59139
FBgn0003963	33225	ush	-0.0602393	7.86795	0.278012	0.598007	0.90125
FBgn0003964	31165	usp	0.158676	5.23903	1.44536	0.229275	0.706008
FBgn0003969	32569	vap	-0.228351	5.60629	3.63205	0.056677	0.461919
FBgn0003977	47869	vir	-0.2304	5.63687	4.21022	0.0401812	0.406265
FBgn0003978	35289	vls	-0.105697	5.55303	0.786492	0.375163	0.804818
FBgn0003984	38657	vn	0.132478	3.36911	0.352553	0.552671	0.888192
FBgn0003997	40009	W	0.442737	3.4512	4.05506	0.0440392	0.419319
FBgn0004034	30980	y	-0.182702	2.20437	0.295108	0.586966	0.899319
FBgn0004047	32339	Yp3	-0.146463	1.11942	0.0734251	0.786414	0.956199
FBgn0004049	41656	yrt	0.0795162	5.58569	0.458277	0.49843	0.864957
FBgn0004050	31230	z	-0.0408001	5.54048	0.121999	0.726877	0.940942
FBgn0004055	38002	uzip	0.0339039	4.16813	0.0399272	0.841623	0.968463
FBgn0004057	32974	Zw	-0.119025	5.60534	1.11953	0.29002	0.750475
FBgn0004066	32584	Pros28.1	-0.177406	7.14382	2.15532	0.142077	0.616785
FBgn0004087	42003	Dhfr	0.115604	4.34555	0.534532	0.464708	0.852837
FBgn0004101	37890	bs	-0.199078	3.91152	1.17843	0.277676	0.743858
FBgn0004103	49260	Pp1-87B	0.0454256	8.50424	0.128839	0.719639	0.938635
FBgn0004106	34411	cdc2	0.150905	4.39567	0.904349	0.341618	0.785595
FBgn0004107	42453	cdc2c	0.104827	5.15543	0.686764	0.407267	0.821196
FBgn0004108	39873	Nrt	0.218669	2.88863	0.707601	0.400241	0.817181
FBgn0004118	42920	nAcRbeta-96A	-0.126288	4.84653	0.685346	0.407752	0.821196
FBgn0004132	48986	boca	0.0869614	5.57627	0.473969	0.491167	0.863373
FBgn0004133	35694	blow	-0.102247	7.42572	0.826383	0.363321	0.797629
FBgn0004167	38418	kst	-0.288312	8.2684	5.28328	0.0215312	0.316202
FBgn0004177	45959	mts	0.421854	8.22179	11.525	0.000686679	0.0462596
FBgn0004179	40459	Csp	0.214499	6.58468	2.97757	0.0844257	0.532893
FBgn0004191	3772392	snRNA:U2:34ABa	1.83357	1.60179	8.65256	0.00326602	0.118254
FBgn0004197	43275	Ser	-0.043955	1.67561	0.0105921	0.918028	0.984656
FBgn0004198	44540	ct	0.0771836	7.43069	0.358891	0.549123	0.885599
FBgn0004227	32603	nonA	0.206183	5.762	3.53842	0.0599626	0.473139
FBgn0004237	48535	Hrb87F	0.157734	8.705	1.31556	0.25139	0.722696
FBgn0004242	33473	Syt1	0.559671	1.50658	1.62437	0.202484	0.683604
FBgn0004359	43235	T48	-0.108119	2.10137	0.0988013	0.753273	0.946484
FBgn0004362	37481	HmgD	0.284408	9.96709	1.57484	0.209505	0.686743
FBgn0004363	34500	porin	0.0433951	9.34913	0.0596295	0.807082	0.96177
FBgn0004367	32608	mei-41	-0.260828	4.72223	3.19961	0.073656	0.511646
FBgn0004368	31425	Ptp4E	-0.190958	5.69964	2.64116	0.104128	0.564968
FBgn0004369	43469	Ptp99A	-0.00245457	5.24677	0.000236284	0.987736	0.996417
FBgn0004370	32115	Ptp10D	-0.229757	4.27215	1.98413	0.158956	0.64124
FBgn0004373	45374	fwd	-0.0935221	5.7794	0.59371	0.440988	0.839375
FBgn0004374	35293	neb	-0.0564347	4.98549	0.179796	0.671548	0.922195
FBgn0004378	38135	Klp61F	-0.199519	6.48535	2.8571	0.0909714	0.542234
FBgn0004379	39068	Klp67A	-0.04344	5.56189	0.140738	0.707548	0.935752
FBgn0004380	38611	Klp64D	-0.166196	4.5447	0.74229	0.388928	0.810241
FBgn0004381	39332	Klp68D	-0.262327	4.33626	2.26182	0.132598	0.600511
FBgn0004387	43310	Klp98A	-0.20626	5.20361	2.62185	0.105401	0.568348
FBgn0004390	39158	Gap1	-0.161621	6.00292	1.77557	0.182694	0.666541
FBgn0004391	32473	shtd	-0.286445	5.89728	5.85532	0.01553	0.273291
FBgn0004395	42738	unk	0.04085	6.39762	0.117925	0.731296	0.941359
FBgn0004396	39682	CrebA	0.379799	7.54082	11.8784	0.000567875	0.0403573
FBgn0004397	31201	Vinc	-0.244807	7.04024	3.8947	0.0484386	0.439031
FBgn0004400	44879	rhi	0.17031	3.46396	0.602693	0.437552	0.838573
FBgn0004401	45961	Pep	0.160866	7.89735	1.88471	0.1698	0.651937
FBgn0004403	47218	RpS14a	0.467599	10.4392	2.4668	0.116275	0.583401
FBgn0004404	47219	RpS14b	0.362381	8.74288	5.4309	0.0197834	0.302968
FBgn0004406	34792	tam	-0.0419967	4.84237	0.0859779	0.769354	0.95096
FBgn0004419	34364	me31B	-0.182855	5.89988	2.63566	0.104489	0.565355
FBgn0004431	38122	LysX	-0.115991	1.75033	0.0841031	0.771812	0.952172
FBgn0004432	32595	Cyp1	0.0864182	9.86173	0.160443	0.688749	0.928931
FBgn0004435	36384	Galpha49B	0.426771	7.87521	13.8629	0.000196643	0.0227092
FBgn0004436	40610	UbcD6	0.0634259	7.38033	0.292602	0.588558	0.899319
FBgn0004449	40464	Ten-m	0.0603557	8.0397	0.178037	0.673065	0.92254
FBgn0004456	32275	mew	0.0194392	4.24708	0.0125739	0.910718	0.984656
FBgn0004462	45970	Pk17E	0.0686905	3.92693	0.114005	0.73563	0.941672
FBgn0004463	36289	RpIII128	-0.305459	4.85321	4.7633	0.0290727	0.351105
FBgn0004465	39856	Su(P)	-0.202921	5.88205	3.3286	0.0680849	0.493682
FBgn0004507	33386	GlyP	0.0348596	7.82478	0.0955497	0.757237	0.948118
FBgn0004509	47220	Fur1	0.0498406	5.9479	0.119336	0.729756	0.941359
FBgn0004510	43236	Ets97D	0.0231725	4.28178	0.0192857	0.88955	0.979913
FBgn0004512	36428	Mdr49	-0.473858	2.07846	1.77833	0.182354	0.666229
FBgn0004556	39871	Dbp73D	-0.211822	3.88623	1.2848	0.257008	0.727756
FBgn0004569	39833	aos	-0.239288	4.1195	2.0131	0.155946	0.63694
FBgn0004574	38493	Rop	-0.170439	7.32752	1.87248	0.171191	0.653865
FBgn0004581	47873	bgcn	-0.309868	6.23883	6.38119	0.0115336	0.244758
FBgn0004583	33218	ex	-0.152085	5.07978	1.14733	0.284109	0.745686
FBgn0004584	33500	Rrp1	0.117603	7.04509	1.13551	0.286603	0.748506
FBgn0004587	41670	B52	0.00942439	8.62793	0.00517682	0.942642	0.989773
FBgn0004597	41801	CycC	0.113894	4.61072	0.589452	0.442631	0.839802
FBgn0004598	32604	Fur2	-0.197499	6.26012	2.60225	0.106712	0.570288
FBgn0004603	NA	NA	-0.0286064	6.46271	0.0560529	0.812847	0.962102
FBgn0004606	43650	zfh1	0.216058	8.43479	2.60315	0.106651	0.570288
FBgn0004607	43795	zfh2	-0.530527	2.80587	3.09896	0.0783425	0.523062
FBgn0004611	33204	Plc21C	-0.188362	4.04722	1.17007	0.279387	0.74507
FBgn0004629	41767	Cys	-0.0138806	6.71225	0.0126287	0.910524	0.984656
FBgn0004635	38168	rho	0.0120115	3.76539	0.00407013	0.949131	0.990515
FBgn0004636	38244	R	0.436668	10.6071	2.34848	0.125406	0.59242
FBgn0004638	36497	drk	0.331872	8.39214	6.90074	0.008616	0.211524
FBgn0004643	47874	mit(1)15	-0.272823	5.721	6.07414	0.0137175	0.265408
FBgn0004647	31293	N	-0.0522789	5.71024	0.142947	0.705369	0.935169
FBgn0004648	30998	svr	-0.130247	6.68257	1.19104	0.275119	0.740639
FBgn0004650	45973	fs(1)N	-0.019207	1.15433	0.00152589	0.96884	0.994076
FBgn0004652	42226	fru	0.0468251	6.86142	0.158536	0.690508	0.929243
FBgn0004654	31185	Pgd	-0.133731	5.83683	1.35475	0.24445	0.717641
FBgn0004655	31187	wapl	-0.0463356	7.00665	0.176894	0.674056	0.922767
FBgn0004656	31722	fs(1)h	0.168259	8.87792	1.12109	0.289685	0.750196
FBgn0004657	44885	mys	0.0140055	7.87515	0.0133802	0.907912	0.984656
FBgn0004687	31474	Mlc-c	0.175657	9.20167	1.13504	0.286703	0.748506
FBgn0004698	36697	mus210	0.0110591	7.73392	0.00943815	0.922607	0.984976
FBgn0004797	44887	mdy	-0.375279	4.38303	5.70592	0.0169078	0.283384
FBgn0004811	49505	fs(2)ltoPP43	0.101611	6.2389	0.701006	0.402446	0.817695
FBgn0004828	31848	His3.3B	0.169577	10.4974	0.382889	0.536061	0.88083
FBgn0004832	31357	Xpac	-0.0717018	3.87093	0.152387	0.696265	0.931372
FBgn0004837	34881	Su(H)	0.167033	3.71184	0.707663	0.400221	0.817181
FBgn0004838	33968	Hrb27C	0.469925	10.6976	2.50244	0.11367	0.581549
FBgn0004839	36283	otk	-0.403945	3.58661	3.54343	0.0597818	0.473139
FBgn0004852	40180	Ac76E	-0.470331	2.10215	1.55549	0.212327	0.686888
FBgn0004855	41741	RpII15	0.287208	6.20506	5.54098	0.0185762	0.293997
FBgn0004856	31840	Bx42	0.210903	7.1714	3.64056	0.0563878	0.461919
FBgn0004858	34844	elB	1.39469	1.04644	7.50557	0.00615083	0.172855
FBgn0004859	43767	ci	0.200797	3.61879	1.0185	0.312876	0.764705
FBgn0004860	44889	ph-d	0.0341562	3.48997	0.024654	0.875232	0.977812
FBgn0004861	31181	ph-p	-0.15598	5.33994	1.49858	0.22089	0.694514
FBgn0004864	32080	hop	-0.115063	5.31117	0.665349	0.414678	0.825586
FBgn0004865	40345	Eip78C	-0.0276311	5.6392	0.0608526	0.805153	0.961653
FBgn0004867	34309	RpS2	0.109354	11.4632	0.0873258	0.767605	0.950421
FBgn0004868	34264	Gdi	0.0810322	7.10906	0.51074	0.474819	0.856385
FBgn0004870	38116	bab1	0.384421	2.03	1.03774	0.308348	0.759839
FBgn0004875	44543	enc	0.0881165	6.71366	0.533185	0.465271	0.853516
FBgn0004876	42289	cdi	0.0272526	4.84939	0.0302961	0.86182	0.97435
FBgn0004882	42752	orb	-0.486196	3.85335	6.68099	0.00974466	0.222981
FBgn0004888	38447	Scsalpha	0.0987493	8.05172	0.786425	0.375183	0.804818
FBgn0004889	47877	tws	0.295739	7.38954	6.82858	0.00897106	0.215978
FBgn0004893	33602	bowl	0.00645769	3.73348	0.00104257	0.974242	0.994076
FBgn0004901	40935	Prat	-0.109981	5.27249	0.786333	0.375211	0.804818
FBgn0004903	43231	Rb97D	0.0362672	6.36078	0.0895984	0.764688	0.948768
FBgn0004907	36059	14-3-3zeta	0.263318	11.5686	0.483892	0.486665	0.862762
FBgn0004908	40993	Arf84F	0.146752	3.63214	0.499401	0.479763	0.858694
FBgn0004913	40607	Gnf1	-0.137728	7.14019	1.45236	0.22815	0.705252
FBgn0004914	44544	Hnf4	0.128191	5.30321	0.984506	0.321089	0.769941
FBgn0004915	34430	TfIIB	-0.284475	4.88601	4.29347	0.038259	0.396508
FBgn0004919	38006	gol	0.0747145	1.52583	0.0298494	0.862832	0.97488
FBgn0004921	35881	Ggamma1	0.35638	9.74532	2.9243	0.0872548	0.538817
FBgn0004924	32458	Top1	0.144608	8.12091	1.09795	0.294717	0.751982
FBgn0004926	39433	eIF-2beta	0.209456	9.43302	1.24968	0.263614	0.732745
FBgn0004957	32818	por	-0.134479	5.01985	0.976179	0.323144	0.769941
FBgn0005198	40201	gig	-0.086781	5.23538	0.432065	0.510977	0.872582
FBgn0005278	48552	Sam-S	0.111816	9.28766	0.421969	0.515956	0.874542
FBgn0005322	44021	nmd	-0.134458	5.59549	1.28769	0.256474	0.727287
FBgn0005355	41565	Su(fu)	-0.173035	5.10954	1.72506	0.189043	0.671966
FBgn0005386	40133	ash1	0.0412491	5.31544	0.0791686	0.778427	0.955404
FBgn0005410	32273	sno	-0.109553	5.13533	0.568161	0.450991	0.843686
FBgn0005411	32602	U2af50	-0.077719	7.34817	0.49782	0.480459	0.858694
FBgn0005427	30975	ewg	0.0162854	4.97066	0.0131074	0.908851	0.984656
FBgn0005533	39088	RpS17	0.188954	10.4642	0.484857	0.486231	0.862714
FBgn0005536	49070	Mbs	0.115147	6.91581	0.764772	0.381839	0.805337
FBgn0005585	41166	Crc	0.191715	10.5391	0.45681	0.499119	0.865147
FBgn0005593	34352	RpL7	0.121197	11.6165	0.100787	0.750888	0.945967
FBgn0005596	43439	yemalpha	-0.168729	5.63769	2.03185	0.154033	0.633181
FBgn0005612	37822	Sox14	0.0026693	5.50296	0.000406094	0.983922	0.996417
FBgn0005613	36575	Sox15	-0.0356178	5.53193	0.0897133	0.764542	0.948768
FBgn0005616	33565	msl-2	0.00130739	2.14114	1.01022e-05	0.997464	0.99926
FBgn0005617	35121	msl-1	-0.142239	5.66311	1.46827	0.225618	0.701828
FBgn0005624	36431	Psc	0.0866628	5.07388	0.420047	0.516914	0.874677
FBgn0005630	44548	lola	-0.069805	8.42815	0.275064	0.599955	0.90125
FBgn0005631	37603	robo	-0.215104	5.54762	2.86836	0.0903369	0.541425
FBgn0005632	43749	faf	-0.216293	7.89979	3.40015	0.0651905	0.487175
FBgn0005634	38001	zip	0.147273	8.82798	0.798474	0.37155	0.8026
FBgn0005640	38433	Eip63E	0.0133204	7.14722	0.0140882	0.905518	0.984656
FBgn0005642	43398	wdn	-0.18701	5.77508	2.76375	0.0964222	0.553305
FBgn0005648	35788	Pabp2	0.279641	8.26038	5.25278	0.0219118	0.317983
FBgn0005649	42848	Rox8	0.131389	8.06824	1.39082	0.238267	0.714415
FBgn0005655	37290	mus209	-0.0526375	8.97868	0.121583	0.727324	0.940942
FBgn0005660	33229	Ets21C	0.0296074	6.53414	0.0625865	0.802454	0.960475
FBgn0005671	41550	Vha55	0.0301758	8.16237	0.0699252	0.791446	0.957064
FBgn0005672	35253	spi	0.00560659	9.05714	0.00129215	0.971325	0.994076
FBgn0005674	42834	Aats-glupro	-0.18464	7.26856	2.54385	0.110725	0.57506
FBgn0005683	44315	pie	0.0386838	4.83637	0.0770333	0.781359	0.9555
FBgn0005694	40370	Aef1	0.155349	6.24655	1.60997	0.204496	0.683721
FBgn0005695	35864	gcl	-0.139317	3.17191	0.333825	0.563415	0.891501
FBgn0005696	43278	DNApol-alpha73	-0.220845	6.17682	3.59265	0.0580355	0.468088
FBgn0005771	34847	noc	-0.143887	1.43006	0.107455	0.743061	0.944145
FBgn0005777	49779	PpD3	0.0740939	6.23713	0.370647	0.542652	0.884202
FBgn0008635	32820	betaCop	-0.125925	7.80104	1.24488	0.264532	0.733239
FBgn0008654	36432	Su(z)2	-0.137029	5.00052	1.05105	0.305264	0.759604
FBgn0010038	48335	GstD2	0.120694	3.35159	0.293232	0.588157	0.899319
FBgn0010039	48336	GstD3	-0.153325	7.27433	1.83263	0.175817	0.659026
FBgn0010040	48337	GstD4	-0.629115	2.15635	2.11685	0.145686	0.619802
FBgn0010041	48338	GstD5	-0.179602	4.1336	1.11306	0.291417	0.750475
FBgn0010043	48340	GstD7	-0.0167011	4.5818	0.0111886	0.91576	0.984656
FBgn0010051	40664	Itp-r83A	-0.279009	5.94829	5.57068	0.0182636	0.291548
FBgn0010053	251984	Jheh1	-0.109199	6.39017	0.835015	0.360826	0.795778
FBgn0010078	37628	RpL23	0.0708362	11.2906	0.040919	0.839694	0.966986
FBgn0010100	44149	Acon	-0.0916666	8.80159	0.425997	0.51396	0.873404
FBgn0010113	43604	hdc	0.11934	7.34889	1.1689	0.279628	0.74507
FBgn0010173	40972	RpA-70	-0.142833	8.38023	1.42519	0.23255	0.707421
FBgn0010194	32838	Wnt5	-0.11084	4.73825	0.585617	0.444119	0.839802
FBgn0010198	44150	RpS15Aa	0.448754	9.73597	4.49857	0.0339231	0.376465
FBgn0010213	36878	Sod2	0.0648889	6.72522	0.319896	0.57167	0.895621
FBgn0010215	40517	alpha-Cat	0.0685562	6.67893	0.343646	0.557732	0.890324
FBgn0010217	43829	ATPsyn-beta	-0.249077	8.17428	4.74103	0.0294515	0.353274
FBgn0010220	35917	Dbp45A	0.0514987	5.33626	0.182421	0.669301	0.921702
FBgn0010222	47895	Nmdmc	-0.241878	6.5007	4.23078	0.0396972	0.404693
FBgn0010223	39861	Galpha73B	-0.171374	2.35544	0.235691	0.627336	0.908967
FBgn0010225	46008	Gel	-0.282205	7.53315	6.60694	0.0101582	0.229601
FBgn0010226	36927	GstS1	-0.52585	1.71591	1.76922	0.183479	0.666541
FBgn0010228	37480	HmgZ	0.549597	8.48774	18.6989	1.53067e-05	0.00536214
FBgn0010235	39445	Klc	-0.00262508	6.60787	0.000513215	0.981926	0.996417
FBgn0010238	36363	Lac	0.105241	6.39129	0.636959	0.424814	0.829209
FBgn0010246	38153	Myo61F	-0.201025	7.69372	3.21492	0.0729698	0.511158
FBgn0010247	3355109	Parp	0.345765	5.25351	7.90984	0.00491665	0.152685
FBgn0010265	34149	RpS13	0.150612	10.9092	0.231145	0.630676	0.909974
FBgn0010269	31872	Dsor1	0.103897	4.75614	0.422229	0.515827	0.874542
FBgn0010278	37767	Ssrp	0.272554	7.7137	4.43913	0.0351241	0.38182
FBgn0010280	39765	Taf4	0.0443795	7.37052	0.14678	0.701632	0.933684
FBgn0010282	40790	TfIIFalpha	0.393722	7.04163	11.4375	0.000719775	0.0462596
FBgn0010287	34102	Trf	0.096715	2.36918	0.0972235	0.755187	0.947346
FBgn0010288	33397	Uch	0.11679	7.58439	1.13624	0.286447	0.748506
FBgn0010292	31701	bys	0.15006	5.49013	1.60294	0.205488	0.683721
FBgn0010300	35197	brat	0.119756	7.72514	0.992651	0.319095	0.769428
FBgn0010303	32256	hep	-0.0279302	6.24023	0.0531743	0.817629	0.962105
FBgn0010309	35200	pigeon	-0.452315	3.83962	5.96835	0.0145649	0.271157
FBgn0010314	34250	Cks30A	0.259955	5.22744	4.37756	0.0364151	0.386572
FBgn0010315	32551	CycD	-0.133444	5.01326	0.965325	0.325849	0.772154
FBgn0010316	36001	dap	0.0843873	5.69625	0.580563	0.446092	0.839802
FBgn0010317	38428	CycJ	-0.0260927	4.86571	0.034935	0.851732	0.970747
FBgn0010328	47249	woc	-0.085838	7.82684	0.458263	0.498437	0.864957
FBgn0010329	31718	Tbh	-0.0805886	3.33725	0.126824	0.721748	0.940237
FBgn0010333	38146	Rac1	0.332113	9.30825	3.68936	0.0547607	0.455784
FBgn0010339	36288	128up	-0.0439986	5.9856	0.14344	0.704885	0.935169
FBgn0010340	41720	140up	0.153596	3.24721	0.386912	0.533927	0.880075
FBgn0010341	32981	Cdc42	0.228171	8.77523	2.59146	0.107441	0.57253
FBgn0010342	35991	Map60	0.0247807	6.22306	0.0393866	0.842685	0.969181
FBgn0010348	40506	Arf79F	0.319859	9.68875	2.51923	0.112466	0.578453
FBgn0010350	43950	CdsA	-0.130289	4.05749	0.531744	0.465874	0.853558
FBgn0010352	39899	Nc73EF	-0.00680145	7.64797	0.00342128	0.953357	0.991775
FBgn0010355	40813	Taf1	-0.0674376	6.39947	0.257105	0.612116	0.903565
FBgn0010356	47900	Taf5	-0.162948	4.75641	1.21508	0.270328	0.737364
FBgn0010379	41957	Akt1	0.151927	6.27389	1.30904	0.252569	0.722696
FBgn0010380	32987	Bap	-0.193735	7.2054	3.03418	0.0815279	0.526724
FBgn0010382	34924	CycE	-0.141881	5.87212	1.43483	0.230978	0.706733
FBgn0010391	47251	Gtp-bp	-0.0565204	7.74001	0.248821	0.617906	0.904704
FBgn0010395	35368	betaInt-nu	-0.0395595	6.48889	0.106789	0.74383	0.944145
FBgn0010397	36615	LamC	0.029162	6.87338	0.0677669	0.794616	0.958077
FBgn0010398	34449	Lrr47	0.0324436	2.1521	0.00879035	0.925302	0.985787
FBgn0010406	38885	RNaseX25	0.231285	4.36371	2.04415	0.152792	0.631421
FBgn0010407	34367	Ror	0.0416061	2.10608	0.0110712	0.916201	0.984656
FBgn0010408	39108	RpS9	-0.0260282	12.2704	0.00341417	0.953405	0.991775
FBgn0010409	36985	RpL18A	0.145349	11.8382	0.128671	0.719814	0.938635
FBgn0010411	37292	RpS18	0.076673	12.2147	0.0302752	0.861867	0.97435
FBgn0010412	32635	RpS19a	0.0806342	11.4842	0.0477331	0.827056	0.963943
FBgn0010415	37447	Sdc	0.381337	8.26827	10.6976	0.00107276	0.057377
FBgn0010416	32607	TH1	-0.0118936	5.76814	0.0118042	0.913482	0.984656
FBgn0010417	40134	Taf6	0.0160299	6.63837	0.0176838	0.894209	0.982181
FBgn0010421	41290	TfIIFbeta	-0.083485	4.60744	0.314108	0.57517	0.896288
FBgn0010422	34883	TfIIS	0.145901	6.31787	1.46888	0.225523	0.701827
FBgn0010434	37205	cora	-0.0483386	8.18476	0.174194	0.676411	0.92379
FBgn0010438	41968	mtSSB	0.171345	6.04296	2.17313	0.14044	0.616113
FBgn0010441	43283	pll	-0.162894	5.47846	1.6932	0.19318	0.678785
FBgn0010470	37449	Fkbp13	0.170275	9.20938	1.01986	0.312552	0.76467
FBgn0010488	46020	NAT1	-0.131685	9.94304	0.343372	0.557889	0.890382
FBgn0010497	47253	dmGlut	-0.227643	5.85716	3.89724	0.0483654	0.439031
FBgn0010501	37729	Dcp-1	0.00628152	5.74341	0.00325453	0.954507	0.991951
FBgn0010504	46027	kermit	-0.00258999	5.78123	0.000545215	0.981371	0.996417
FBgn0010516	36252	wal	-0.136722	6.74525	1.34232	0.246625	0.718833
FBgn0010520	46032	Bka	-0.24047	3.45388	1.30581	0.253154	0.722696
FBgn0010531	46035	CCS	0.0678263	3.29804	0.0934881	0.759789	0.94865
FBgn0010548	45398	Aldh-III	-0.285565	7.01457	6.23293	0.0125396	0.254616
FBgn0010549	47905	l(2)03659	-0.0709127	6.03932	0.361259	0.547808	0.885168
FBgn0010551	46038	l(2)03709	0.0419827	8.55961	0.10706	0.743516	0.944145
FBgn0010575	44027	sbb	0.0602514	6.93018	0.214406	0.643336	0.914489
FBgn0010583	33262	dock	-0.0372436	6.86307	0.109865	0.740298	0.943857
FBgn0010590	46058	Prosbeta1	-0.0428497	6.78555	0.139123	0.709154	0.936459
FBgn0010591	46059	Sply	-0.167912	6.10205	2.11311	0.146042	0.619987
FBgn0010602	33226	lwr	0.0167919	8.71638	0.0147378	0.903375	0.984656
FBgn0010607	46066	l(2)05714	0.315588	4.19183	3.35013	0.0671998	0.492464
FBgn0010611	44154	Hmgs	-0.0974805	7.35803	0.770032	0.380207	0.805337
FBgn0010612	46069	l(2)06225	0.0978365	7.47251	0.783426	0.376095	0.80512
FBgn0010621	36308	Cct5	-0.0692518	8.24604	0.358644	0.54926	0.885599
FBgn0010622	46074	l(2)06496	0.0240554	4.43864	0.0246192	0.87532	0.977812
FBgn0010638	46080	Sec61beta	0.203874	8.00401	3.45587	0.0630276	0.479621
FBgn0010651	46085	l(2)08717	-0.0573406	5.44911	0.225217	0.635093	0.911155
FBgn0010660	46091	Nup214	-0.234849	6.84452	4.20238	0.0403674	0.406478
FBgn0010704	33402	l(2)s5379	0.186538	7.35845	2.87378	0.090033	0.541425
FBgn0010741	46121	l(3)01239	0.261646	6.91525	4.84325	0.0277546	0.342476
FBgn0010747	38593	Srp54k	0.10332	6.93198	0.851004	0.356268	0.791869
FBgn0010750	40593	atms	-0.0516788	6.79942	0.203144	0.652195	0.916009
FBgn0010762	39212	simj	-0.0580783	6.43971	0.242535	0.622381	0.906944
FBgn0010768	42300	sqz	0.119016	2.9089	0.205924	0.649981	0.915564
FBgn0010770	42502	ppan	0.250931	5.76272	3.28051	0.0701073	0.500641
FBgn0010772	40699	Xe7	0.105385	6.76226	0.852153	0.355944	0.791869
FBgn0010774	44029	Ref1	0.15221	7.71013	1.88161	0.170151	0.651937
FBgn0010786	46140	l(3)02640	0.0122187	9.26262	0.00521859	0.942411	0.989773
FBgn0010803	45399	Aats-trp	-0.138629	6.23241	1.19919	0.273484	0.739867
FBgn0010808	43672	l(3)03670	0.0466454	7.16173	0.18201	0.669652	0.921702
FBgn0010812	44910	unc-45	0.0702787	5.0455	0.270183	0.603209	0.902343
FBgn0010825	46156	Gug	0.0355151	6.47959	0.0649853	0.798783	0.959579
FBgn0010830	46158	l(3)04053	0.0298726	5.4955	0.0606197	0.805519	0.961653
FBgn0010877	47260	l(3)05822	-0.0260171	6.07681	0.0373324	0.84679	0.969894
FBgn0010894	46187	sinu	0.0686617	3.10857	0.0748044	0.784466	0.956101
FBgn0010905	46194	Spn	0.0794459	6.99645	0.3766	0.539429	0.882941
FBgn0010909	44030	msn	-0.072717	8.88116	0.249528	0.617408	0.90468
FBgn0010926	46201	l(3)07882	0.246357	5.29012	2.72827	0.0985858	0.556645
FBgn0011016	39768	SsRbeta	-0.0973177	7.65246	0.766548	0.381287	0.805337
FBgn0011020	40859	Sas-4	-0.17732	4.77438	1.54612	0.21371	0.688432
FBgn0011202	35340	dia	-0.0215118	5.8765	0.0295325	0.863555	0.974922
FBgn0011204	38174	cue	-0.254654	7.60123	5.13488	0.0234498	0.324425
FBgn0011205	46234	fbl	0.0596218	5.32864	0.227218	0.633594	0.910715
FBgn0011206	39049	bol	0.434406	4.26093	6.3116	0.0119951	0.24763
FBgn0011207	34286	pelo	0.166066	5.63392	2.19196	0.138733	0.612324
FBgn0011211	37617	blw	-0.00947262	10.1177	0.00157371	0.968356	0.994076
FBgn0011217	41785	eff	0.0873609	9.68196	0.186725	0.665657	0.920979
FBgn0011224	48571	heph	0.0870278	5.81623	0.645201	0.421834	0.828519
FBgn0011225	42889	jar	-0.416168	5.32339	10.9717	0.000925146	0.0530058
FBgn0011227	45401	ox	0.643133	6.16557	14.684	0.000127121	0.0178535
FBgn0011230	46243	poe	-0.349716	7.24993	9.58239	0.00196453	0.0859629
FBgn0011232	47942	scat	-0.11205	4.02265	0.39097	0.53179	0.878667
FBgn0011236	37785	ken	-0.160011	5.88475	2.00452	0.156831	0.637939
FBgn0011241	47272	cbx	0.118679	3.4881	0.336425	0.5619	0.89082
FBgn0011260	36846	Sema-2a	-0.000797457	5.0336	3.49524e-05	0.995283	0.99839
FBgn0011272	34329	RpL13	0.0883447	11.2903	0.0637343	0.800688	0.959605
FBgn0011274	35045	Dif	-0.353191	4.99533	6.80512	0.00908968	0.217132
FBgn0011284	39484	RpS4	0.00690226	12.0955	0.000261269	0.987104	0.996417
FBgn0011288	3355084	Snap25	0.258473	5.58234	5.02904	0.0249257	0.329761
FBgn0011289	43284	TfIIA-L	0.0841989	7.29902	0.588434	0.443025	0.839802
FBgn0011290	41406	Taf12	-0.0873428	6.08082	0.556029	0.455865	0.846074
FBgn0011291	34293	Taf11	0.485756	4.25414	8.86771	0.00290259	0.111046
FBgn0011297	37754	l(2)not	-0.0523688	5.37577	0.174159	0.676442	0.92379
FBgn0011300	35900	babo	0.0840647	6.23265	0.425139	0.514384	0.873404
FBgn0011305	34370	Rsf1	0.229373	5.88378	4.21134	0.0401547	0.406265
FBgn0011327	39102	Uch-L3	0.0854836	6.1214	0.550775	0.458001	0.847331
FBgn0011335	39374	l(3)j2D3	-0.0208288	5.01791	0.0226251	0.880436	0.97812
FBgn0011336	43005	OstStt3	-0.138908	7.7918	1.51983	0.217645	0.691475
FBgn0011361	38154	mtacp1	0.0740785	8.3403	0.363511	0.546563	0.885168
FBgn0011455	46260	l(3)neo18	0.0328276	6.51247	0.078122	0.779859	0.955404
FBgn0011474	41743	pr-set7	0.15429	5.79506	1.75596	0.18513	0.668342
FBgn0011476	41851	l(3)neo43	0.225445	3.74676	1.01698	0.313236	0.765075
FBgn0011481	42177	Ssdp	0.256392	7.36182	4.89655	0.0269105	0.340068
FBgn0011509	47283	SrpRbeta	-0.0288593	6.36399	0.0481784	0.826264	0.963236
FBgn0011566	44554	Bzd	-0.145103	3.84412	0.616078	0.432508	0.834422
FBgn0011570	33346	cpb	0.220089	9.27968	1.66422	0.197035	0.678891
FBgn0011571	32587	caz	0.207884	6.32996	2.75673	0.0968461	0.553653
FBgn0011573	38232	Cdc37	0.181826	7.6532	2.64864	0.103639	0.56411
FBgn0011576	31192	Cyp4d2	-0.0448674	3.67136	0.0509317	0.82145	0.962482
FBgn0011584	34333	Trp1	0.285001	6.34743	4.21952	0.0399615	0.405327
FBgn0011586	43951	e(r)	0.214377	7.50601	3.46337	0.0627425	0.479621
FBgn0011589	37047	elk	-0.540238	2.1046	2.07165	0.150059	0.626692
FBgn0011592	36377	fra	-0.280516	5.50633	4.65796	0.0309099	0.359939
FBgn0011604	36390	Iswi	-0.0776062	7.79276	0.437917	0.508129	0.871163
FBgn0011606	31240	Klp3A	-0.0952438	6.23859	0.567616	0.451208	0.843686
FBgn0011638	35305	La	-0.0129683	7.91982	0.0120609	0.91255	0.984656
FBgn0011640	38811	lark	-0.102835	7.15025	0.825865	0.363471	0.797629
FBgn0011642	317824	Zyx	-0.155761	4.54278	0.893528	0.344523	0.786737
FBgn0011648	33529	Mad	0.0430495	4.97221	0.0971842	0.755235	0.947346
FBgn0011655	43725	Med	0.113444	6.59079	0.867369	0.351685	0.790061
FBgn0011656	36032	Mef2	-0.210221	4.87116	2.26337	0.132466	0.600511
FBgn0011659	35796	Mlh1	-0.267393	6.70281	4.93773	0.0262765	0.336498
FBgn0011660	36705	Pms2	-0.138306	5.32338	1.21339	0.270663	0.737364
FBgn0011661	31816	Moe	0.246354	10.9324	0.595995	0.44011	0.839375
FBgn0011666	43087	msi	0.14345	6.52461	1.37395	0.241135	0.715817
FBgn0011672	42490	Mvl	-0.234949	9.03118	2.2768	0.131322	0.599137
FBgn0011674	37355	insc	-0.00425757	4.42444	0.000728281	0.97847	0.995074
FBgn0011676	34495	Nos	-0.49726	1.25431	1.11586	0.290811	0.750475
FBgn0011692	38515	pav	-0.246742	5.90993	4.71239	0.029946	0.356411
FBgn0011703	34392	RnrL	-0.0477549	7.61418	0.188057	0.664539	0.920348
FBgn0011704	36280	RnrS	-0.049569	9.3871	0.0770998	0.781267	0.9555
FBgn0011705	34222	rost	-0.052059	4.98107	0.141852	0.706447	0.935558
FBgn0011708	34966	Syx5	0.042263	5.98308	0.129361	0.719096	0.93852
FBgn0011710	33114	2001-09-01	0.0187055	7.31112	0.0284349	0.86609	0.975407
FBgn0011715	40657	Snr1	0.0999442	6.0404	0.745688	0.387845	0.809763
FBgn0011722	33896	Tig	-0.120317	8.13458	0.913192	0.339269	0.78397
FBgn0011725	42880	twin	0.0430793	6.47438	0.135328	0.712971	0.937213
FBgn0011726	37841	tsr	0.101472	8.97875	0.44567	0.504399	0.87042
FBgn0011737	33965	wee	-0.164261	4.83353	1.31556	0.25139	0.722696
FBgn0011739	43651	wts	0.0164285	6.66018	0.0132578	0.908332	0.984656
FBgn0011740	41126	alpha-Man-II	-0.247429	4.22741	2.03605	0.153608	0.63191
FBgn0011741	32514	Arp6	0.205698	6.63447	3.13089	0.0768217	0.519004
FBgn0011742	32623	Arp2	0.0491283	7.57811	0.193108	0.660342	0.918756
FBgn0011745	41566	Arp1	-0.0724501	6.3553	0.366639	0.544842	0.885042
FBgn0011747	43770	Ank	-0.0902137	6.27326	0.430952	0.511522	0.872729
FBgn0011754	32120	PhKgamma	0.194044	6.48394	2.36304	0.12424	0.59139
FBgn0011760	31405	ctp	0.293636	9.57988	2.29614	0.129696	0.596944
FBgn0011762	38942	DNApol-alpha50	-0.127328	3.97861	0.47426	0.491034	0.863373
FBgn0011763	36461	Dp	-0.0245482	7.85997	0.0424169	0.836827	0.966114
FBgn0011764	117294	Dsp1	0.0088085	7.06404	0.00512569	0.942925	0.989773
FBgn0011766	42550	E2f	0.211228	8.89716	1.98395	0.158975	0.64124
FBgn0011768	41311	Fdh	-0.17174	7.30084	2.43145	0.118923	0.586297
FBgn0011769	39070	Fdxh	0.142491	4.92978	0.866512	0.351923	0.790246
FBgn0011770	31960	Gip	0.158626	4.07717	0.809157	0.36837	0.800671
FBgn0011771	40462	Hem	-0.262092	5.98313	5.01414	0.0251411	0.330431
FBgn0011774	117419	Irbp	-0.0945491	6.46862	0.63418	0.425826	0.829433
FBgn0011785	42898	BRWD3	-0.122207	6.79316	1.13802	0.286071	0.748506
FBgn0011787	44326	mRpL12	0.261381	6.33624	3.79643	0.0513621	0.445219
FBgn0011802	39195	Gem3	-0.186278	3.59398	0.879762	0.348267	0.787839
FBgn0011817	38890	nmo	0.0538957	4.8022	0.146047	0.702342	0.933803
FBgn0011818	33435	oaf	0.0592559	5.35105	0.243403	0.621759	0.906903
FBgn0011823	34338	Pen	0.0908082	9.04851	0.339496	0.56012	0.890499
FBgn0011824	37397	CG4038	0.35129	6.49104	8.32487	0.00391059	0.135061
FBgn0011826	32624	Pp2B-14D	0.409277	6.74435	8.75465	0.00308813	0.115275
FBgn0011828	38326	Pxn	0.164832	6.56028	1.20488	0.272349	0.73896
FBgn0011836	39164	Taf2	0.187254	5.04423	1.54203	0.214315	0.688678
FBgn0011837	32222	Tis11	0.22364	10.1538	0.849748	0.356624	0.792004
FBgn0012034	40348	AcCoAS	-0.049264	7.11948	0.203119	0.652215	0.916009
FBgn0012036	34256	Aldh	-0.17761	8.29734	2.29539	0.129759	0.596944
FBgn0012037	34805	Ance	-0.155176	7.92736	1.8176	0.177599	0.659303
FBgn0012051	37232	CalpA	-0.0786297	6.15	0.470518	0.492749	0.863373
FBgn0012058	38798	Cdc27	0.0526544	5.93463	0.195258	0.658576	0.918189
FBgn0013263	2768981	Trl	0.143126	3.40518	0.410926	0.5215	0.876273
FBgn0013269	41860	FK506-bp1	0.205075	8.19765	2.90863	0.0881066	0.539163
FBgn0013272	37549	Gp150	-0.128096	7.5878	0.940328	0.332193	0.777713
FBgn0013277	44921	Hsp70Ba	1.18042	1.95128	6.00919	0.0142315	0.269016
FBgn0013278	48582	Hsp70Bb	1.03873	1.91664	5.6059	0.0179	0.289495
FBgn0013279	48583	Hsp70Bc	0.753476	1.74199	3.47398	0.0623412	0.479621
FBgn0013303	40186	Nca	0.167171	5.71845	2.26336	0.132467	0.600511
FBgn0013305	36419	Nmda1	0.000628133	8.43396	2.65237e-05	0.995891	0.998728
FBgn0013323	33238	Ptth	0.124578	2.736	0.193314	0.660172	0.918756
FBgn0013325	37235	RpL11	0.0815931	11.6041	0.0459601	0.830248	0.9659
FBgn0013334	41938	Sap47	0.216649	6.7609	3.24534	0.0716267	0.505916
FBgn0013343	42854	Syx1A	0.300504	8.69611	4.66156	0.0308452	0.359939
FBgn0013347	42822	TfIIA-S	0.0878266	6.52706	0.475385	0.49052	0.863373
FBgn0013348	35473	TpnC41C	0.161107	3.43602	0.56491	0.452289	0.843732
FBgn0013432	31186	bcn92	0.211643	6.43049	3.15285	0.0757943	0.517922
FBgn0013435	36051	cdc2rk	-0.0604477	3.1049	0.0620346	0.803309	0.961343
FBgn0013531	43952	MED20	0.0954991	3.04756	0.15101	0.697572	0.932156
FBgn0013548	46326	l(2)dtl	-0.0702775	5.73388	0.396604	0.528848	0.878667
FBgn0013563	45460	Pex1	-0.378326	3.06426	1.55464	0.212451	0.686888
FBgn0013576	45467	mtd	0.0134907	8.65744	0.0102853	0.91922	0.984656
FBgn0013672	192467	ATP6	0.234377	8.71252	2.88418	0.0894533	0.540895
FBgn0013673	192468	ATP8	2.73989	3.17149	65.5751	5.59405e-16	2.06728e-12
FBgn0013674	192469	COX1	0.0732791	11.5806	0.0330942	0.855647	0.972064
FBgn0013675	192470	COX2	0.0848733	9.98632	0.119831	0.729218	0.941359
FBgn0013676	192471	COX3	0.250978	11.1934	0.488715	0.484501	0.861426
FBgn0013678	192472	CYTB	0.0612834	9.33607	0.0946649	0.758328	0.94865
FBgn0013679	192473	ND1	1.2208	5.80997	34.1982	4.97753e-09	7.35779e-06
FBgn0013680	192474	ND2	1.49309	2.73508	20.0798	7.42759e-06	0.00343108
FBgn0013681	192475	ND3	1.61067	4.28648	36.7702	1.32904e-09	2.45573e-06
FBgn0013684	192478	ND5	0.332546	7.26033	6.28533	0.0121741	0.249942
FBgn0013686	261002	lrRNA	0.871963	14.5159	1.72752	0.188728	0.671589
FBgn0013688	261003	srRNA	1.50956	3.29323	36.8346	1.28588e-09	2.45573e-06
FBgn0013717	40030	not	0.0979739	5.77755	0.775409	0.378549	0.805337
FBgn0013718	39572	nuf	0.311863	7.16226	8.10519	0.00441387	0.144572
FBgn0013720	31101	pck	-0.182458	5.34272	1.65067	0.198867	0.680172
FBgn0013726	35801	pnut	0.169802	8.15058	1.88065	0.170261	0.65202
FBgn0013732	35564	sced	0.00506055	4.3259	0.00102953	0.974403	0.994076
FBgn0013733	36542	shot	-0.0177679	9.62079	0.00769374	0.930104	0.987323
FBgn0013746	34225	alien	-0.146769	4.59277	0.948755	0.330036	0.775398
FBgn0013749	43823	Arf102F	-0.0171608	4.17138	0.0103185	0.91909	0.984656
FBgn0013750	36699	Arf51F	0.351711	8.32876	8.82252	0.00297535	0.112198
FBgn0013753	38198	Bgb	-0.0511965	5.54156	0.181205	0.67034	0.921749
FBgn0013756	36264	Mtor	-0.158678	7.07221	2.10757	0.146572	0.621164
FBgn0013759	42567	CASK	-0.0516878	6.79133	0.197474	0.656768	0.917266
FBgn0013762	36727	Cdk5	-0.155277	5.02214	1.3341	0.248077	0.721297
FBgn0013763	36868	CG5210	-0.0803514	9.13043	0.25013	0.616984	0.90468
FBgn0013764	37837	Chi	-0.120392	5.83344	1.13611	0.286476	0.748506
FBgn0013765	36491	cnn	-0.0202873	7.62631	0.0321359	0.85773	0.97291
FBgn0013770	36546	Cp1	0.269413	10.0092	1.37431	0.241072	0.715817
FBgn0013771	36663	Cyp6a9	0.19477	1.62127	0.216818	0.641475	0.914489
FBgn0013772	36666	Cyp6a8	0.146105	6.02514	1.38024	0.240061	0.715817
FBgn0013773	49847	Cyp6a22	-0.0689264	4.61464	0.208529	0.647923	0.915564
FBgn0013799	40164	Deaf1	0.0481579	6.47922	0.161005	0.688233	0.928931
FBgn0013811	38226	Dhc62B	-0.204854	6.1201	2.98094	0.0842502	0.53268
FBgn0013953	42962	Esp	-0.441344	2.34765	1.30944	0.252495	0.722696
FBgn0013954	37214	FK506-bp2	0.192318	9.18077	1.38504	0.239245	0.715817
FBgn0013981	41773	His4r	-0.0208353	8.89088	0.02066	0.885709	0.979913
FBgn0013983	44339	imd	-0.0524689	5.22339	0.175566	0.675212	0.92362
FBgn0013984	42549	InR	0.0785847	7.39997	0.32533	0.568422	0.894255
FBgn0013987	44573	MAPk-Ak2	0.153564	8.29142	1.65325	0.198517	0.680172
FBgn0013988	NA	NA	-0.241187	3.8463	1.37514	0.240931	0.715817
FBgn0013997	39387	Nrx-IV	-0.125995	6.2549	1.01942	0.312656	0.764672
FBgn0013998	41694	Nsf2	-0.232885	6.31907	3.70553	0.0542324	0.453632
FBgn0014001	44039	Pak	-0.263084	7.20001	5.53577	0.0186315	0.294243
FBgn0014002	39651	Pdi	-0.074963	9.93993	0.113642	0.736035	0.941672
FBgn0014006	42366	Pk92B	-0.0718827	6.19537	0.383237	0.535876	0.880734
FBgn0014007	39443	Ptp69D	-0.0893262	4.50433	0.292536	0.5886	0.899319
FBgn0014009	35577	Rab2	0.279447	7.50994	6.34451	0.0117745	0.245986
FBgn0014010	33418	Rab5	0.296621	9.1097	3.48739	0.0618379	0.479621
FBgn0014011	38831	Rac2	0.0886514	6.63848	0.511466	0.474505	0.856385
FBgn0014018	41087	Rel	-0.202311	6.55844	3.02809	0.0818341	0.52778
FBgn0014020	36775	Rho1	0.172236	10.3698	0.433221	0.510412	0.872245
FBgn0014022	41139	Rlb1	0.351345	4.96961	6.20883	0.0127115	0.255301
FBgn0014023	41141	mRpL47	0.00701751	5.66077	0.00385301	0.950505	0.990793
FBgn0014024	31448	Rnp4F	0.0764332	6.22347	0.361676	0.547577	0.885168
FBgn0014026	31588	RpL7A	0.13841	12.2941	0.0955854	0.757193	0.948118
FBgn0014028	35590	SdhB	-0.0778595	7.48409	0.494067	0.482119	0.859672
FBgn0014029	42438	2002-09-01	0.0743481	7.1845	0.437201	0.508477	0.871231
FBgn0014031	31587	Spat	-0.107945	3.50843	0.226447	0.634171	0.910939
FBgn0014032	31781	Sptr	-0.0628256	3.17485	0.0675168	0.794987	0.958227
FBgn0014033	33621	Sr-CI	0.257877	2.85801	0.674583	0.411458	0.824195
FBgn0014037	40171	Su(Tpl)	0.0100447	9.56885	0.00275729	0.958122	0.99329
FBgn0014075	40055	Ugt	-0.188781	7.28031	2.7883	0.0949548	0.550872
FBgn0014092	34970	CG4278	-0.0134938	3.42876	0.00405309	0.949238	0.990515
FBgn0014127	35287	barr	-0.106294	5.94502	0.794638	0.372701	0.802867
FBgn0014133	32119	bif	0.0549378	7.66508	0.189403	0.663414	0.919724
FBgn0014135	42356	bnl	0.0982324	8.31558	0.67871	0.410031	0.822906
FBgn0014141	42066	cher	-0.164143	8.32494	1.73914	0.187248	0.669222
FBgn0014143	40374	croc	0.660615	1.05079	1.6207	0.202994	0.683604
FBgn0014163	39826	fax	0.407012	12.1631	0.859069	0.353999	0.791869
FBgn0014184	36307	Oda	-0.103746	8.18388	0.818286	0.365682	0.79942
FBgn0014189	33781	Hel25E	-0.0770085	7.35631	0.481912	0.487558	0.863151
FBgn0014269	37187	prod	-0.069167	5.58548	0.376488	0.539489	0.882941
FBgn0014340	31518	mof	-0.0176517	4.64516	0.0111109	0.916052	0.984656
FBgn0014342	40667	mia	-0.00630802	4.08591	0.00130515	0.971181	0.994076
FBgn0014366	40678	noi	0.0116989	5.25646	0.00861848	0.926034	0.985787
FBgn0014380	41136	RhoL	0.0120897	6.29031	0.00973448	0.921405	0.984719
FBgn0014388	38424	sty	0.3485	9.63002	2.99872	0.0833305	0.531598
FBgn0014391	44046	sun	0.218297	7.03659	3.90837	0.0480461	0.439031
FBgn0014395	33130	tilB	0.11495	2.50045	0.130361	0.718058	0.938067
FBgn0014411	31144	Vps26	0.120603	5.98755	1.00375	0.316405	0.76822
FBgn0014417	46386	CG13397	-0.0953517	5.75495	0.750768	0.386233	0.808244
FBgn0014427	46391	CG11899	0.207022	4.51528	1.87176	0.171274	0.653865
FBgn0014455	32471	Ahcy13	-0.0235137	8.42946	0.0369296	0.847608	0.969894
FBgn0014466	31786	Cp7Fc	0.366515	1.32905	0.628186	0.428022	0.831283
FBgn0014467	32817	CrebB-17A	0.00760374	6.79998	0.00449397	0.946552	0.990509
FBgn0014469	35822	Cyp4e2	-0.0135091	5.68072	0.0146609	0.903626	0.984656
FBgn0014857	33736	His3.3A	0.0187341	8.09983	0.0281083	0.866854	0.975407
FBgn0014861	40973	Mcm2	-0.199059	7.26188	3.07129	0.0796865	0.52539
FBgn0014868	31849	Ost48	-0.141261	7.84356	1.54322	0.214139	0.688432
FBgn0014869	43447	Pglym78	0.0902362	7.59781	0.66802	0.413743	0.825586
FBgn0014870	36889	Psi	-0.0325918	6.65137	0.0772098	0.781115	0.9555
FBgn0014877	36508	Roe1	0.263567	6.2225	4.73421	0.0295684	0.353274
FBgn0014879	41844	Set	0.159523	7.19335	2.01246	0.156012	0.63694
FBgn0014903	44620	CG14630	0.12146	4.57438	0.63335	0.426129	0.829689
FBgn0014906	33532	Hydr2	-0.0589882	5.84184	0.27592	0.599388	0.90125
FBgn0014930	40936	CG2846	0.142432	6.02509	1.50891	0.219306	0.691998
FBgn0014931	40937	CG2678	0.188659	3.97059	1.08855	0.296792	0.753551
FBgn0014949	42664	btn	0.237891	1.27628	0.270962	0.602687	0.902261
FBgn0015000	33704	betaggt-I	-0.0557262	4.88453	0.158037	0.69097	0.929383
FBgn0015019	42029	Cctgamma	0.0919322	9.18236	0.315065	0.574589	0.896288
FBgn0015024	32221	CkIalpha	0.434762	7.93298	13.3558	0.000257619	0.0270233
FBgn0015025	39721	CkIIalpha-i1	0.197201	3.48728	0.929425	0.335012	0.780806
FBgn0015031	46040	cype	0.282812	6.58696	5.72031	0.0167697	0.283148
FBgn0015034	44632	Cyp4e1	-0.65002	2.06175	3.39585	0.0653607	0.487175
FBgn0015036	31193	Cyp4ae1	-0.611461	1.85767	1.92772	0.165008	0.647268
FBgn0015037	45524	Cyp4p1	-0.285879	3.82329	2.01186	0.156074	0.63694
FBgn0015075	40457	Ddx1	-0.348336	4.78076	5.86024	0.0154867	0.273291
FBgn0015218	45525	eIF-4E	0.0237311	8.12984	0.0407342	0.840052	0.966986
FBgn0015221	44965	Fer2LCH	0.210504	9.2561	1.54715	0.213557	0.688432
FBgn0015222	46415	Fer1HCH	0.103041	9.1673	0.401356	0.52639	0.878426
FBgn0015229	42571	glec	0.22844	6.74323	3.29321	0.0695669	0.498709
FBgn0015239	40378	Hr78	-0.187623	5.85064	2.74974	0.0972704	0.553784
FBgn0015240	42993	Hr96	0.0228537	5.71024	0.0366771	0.848124	0.969894
FBgn0015245	32045	Hsp60	0.0359936	10.3439	0.0193556	0.889352	0.979913
FBgn0015247	36748	Iap2	-0.168876	6.2483	1.94561	0.163061	0.646829
FBgn0015268	37798	Nap1	-0.0307819	8.51722	0.0601796	0.806212	0.96177
FBgn0015269	43149	Nf1	-0.102939	5.51038	0.740345	0.389551	0.810241
FBgn0015270	41703	Orc2	-0.222629	5.38246	3.0408	0.0811958	0.526433
FBgn0015271	34794	Orc5	-0.195027	3.478	0.85958	0.353856	0.791811
FBgn0015277	37733	Pi3K59F	-0.229518	5.72462	4.13978	0.0418866	0.413122
FBgn0015278	39329	Pi3K68D	-0.210866	5.70854	3.47124	0.0624445	0.479621
FBgn0015279	42446	Pi3K92E	-0.128445	6.88085	1.26511	0.260686	0.729728
FBgn0015282	42828	Pros26.4	-0.0970872	6.55904	0.696507	0.40396	0.81908
FBgn0015283	40388	Pros54	0.0551371	6.8344	0.230998	0.630785	0.909974
FBgn0015286	31332	Rala	0.274423	7.41813	6.12375	0.0133378	0.261484
FBgn0015288	31022	RpL22	0.287468	9.97504	1.44301	0.229653	0.706059
FBgn0015295	44353	shark	-0.144722	5.86654	1.69282	0.19323	0.678785
FBgn0015296	44052	Shc	-0.0606153	6.68244	0.276261	0.599163	0.90125
FBgn0015298	38815	Srp19	0.092353	5.41263	0.432497	0.510766	0.872582
FBgn0015299	34120	Ssb-c31a	0.0599706	6.09826	0.263541	0.607698	0.902757
FBgn0015316	34226	Try29F	0.442727	1.80392	1.34279	0.246543	0.718833
FBgn0015320	34487	UbcD2	0.24886	6.71567	4.65066	0.0310416	0.359939
FBgn0015321	39133	UbcD4	0.242444	5.75659	4.45234	0.0348535	0.380857
FBgn0015324	40679	Vha26	0.139388	10.1494	0.332932	0.563938	0.891946
FBgn0015331	40530	abs	-0.164788	5.35206	1.65194	0.198695	0.680172
FBgn0015338	34965	CG5861	0.367698	5.6273	6.39072	0.0114718	0.244346
FBgn0015359	38287	CG2034	0.114379	6.04548	0.825198	0.363665	0.797773
FBgn0015360	38288	oxt	-0.00544723	5.6946	0.00233113	0.961492	0.994076
FBgn0015371	36678	chn	-0.0149205	5.152	0.0132393	0.908396	0.984656
FBgn0015372	44172	RabX1	-0.0916062	6.52717	0.580767	0.446012	0.839802
FBgn0015374	44054	crl	0.159036	6.47954	1.70624	0.191474	0.675183
FBgn0015376	44637	cutlet	-0.229155	4.64288	2.32338	0.127443	0.593966
FBgn0015379	33111	dod	0.101233	5.48395	0.713674	0.398227	0.817128
FBgn0015391	35001	glu	0.0531203	6.82586	0.221188	0.638136	0.912628
FBgn0015393	44173	hoip	0.0616148	6.20234	0.253049	0.614936	0.90443
FBgn0015396	41265	jumu	-0.180174	5.97164	2.36346	0.124206	0.59139
FBgn0015399	34688	kek1	0.153921	8.60748	1.26501	0.260704	0.729728
FBgn0015402	40660	ksr	-0.197597	5.11152	2.24394	0.134139	0.603008
FBgn0015477	35939	Rme-8	-0.244105	6.65412	4.38974	0.0361559	0.386572
FBgn0015509	35742	lin19	-0.254405	6.96163	4.99719	0.0253885	0.331531
FBgn0015513	42817	mbc	-0.280204	6.83391	5.5544	0.0184343	0.293007
FBgn0015520	42026	nonA-l	-0.0752778	4.55054	0.248573	0.618081	0.904781
FBgn0015521	33487	RpS21	0.139112	10.9008	0.194294	0.659366	0.918308
FBgn0015522	37039	olf186-M	0.183099	5.55869	2.49285	0.114365	0.582487
FBgn0015527	33112	pen	0.122467	6.30041	0.953544	0.328819	0.774968
FBgn0015542	43580	sima	-0.105201	7.30198	0.883786	0.347167	0.787839
FBgn0015544	43958	spag	-0.152086	3.94734	0.647252	0.421097	0.828519
FBgn0015546	34842	spel1	-0.0570051	4.61228	0.112435	0.737389	0.942539
FBgn0015553	35119	tos	-0.185711	4.54155	1.44573	0.229214	0.706008
FBgn0015558	33109	tty	-0.12593	4.71468	0.724766	0.394585	0.815126
FBgn0015562	44057	veg	0.0625551	5.25561	0.255575	0.613177	0.903867
FBgn0015568	40909	alpha-Est1	-0.510115	2.16004	2.16382	0.141293	0.616469
FBgn0015569	40896	alpha-Est10	-0.443061	1.46071	1.01658	0.313331	0.765075
FBgn0015571	40907	alpha-Est3	-0.366811	2.76505	1.68539	0.19421	0.678891
FBgn0015575	40901	alpha-Est7	-0.469963	3.97802	6.69628	0.00966142	0.222566
FBgn0015577	40897	alpha-Est9	0.157723	2.60834	0.266832	0.605465	0.902434
FBgn0015582	36203	dare	-0.0241954	4.89962	0.0314084	0.859332	0.973532
FBgn0015589	44642	Apc	-0.0442637	6.97092	0.157898	0.691099	0.929387
FBgn0015600	33526	toc	-0.0968719	5.33739	0.635482	0.425351	0.829433
FBgn0015602	36645	BEAF-32	0.0431112	6.11621	0.121864	0.727021	0.940942
FBgn0015614	46456	CanB2	0.237128	8.21844	4.27161	0.0387542	0.398376
FBgn0015615	32627	Cap	-0.0491123	6.17024	0.180371	0.671055	0.921749
FBgn0015618	39157	Cdk8	-0.0739337	3.15944	0.0902329	0.763881	0.94865
FBgn0015621	33259	Clp	0.044282	6.19257	0.147796	0.70065	0.933226
FBgn0015622	44643	Cnx99A	0.181596	8.66029	1.83832	0.175147	0.658465
FBgn0015623	33883	Cpr	0.0186169	7.91761	0.0242646	0.876214	0.977812
FBgn0015625	42971	CycB3	-0.299638	5.16653	5.38361	0.0203268	0.30723
FBgn0015663	44058	Dot	-0.380024	2.15318	1.26424	0.26085	0.729728
FBgn0015664	34328	Dref	-0.322869	5.67521	8.16633	0.00426751	0.142077
FBgn0015737	43294	Hmu	-0.00434647	8.22385	0.00141213	0.970024	0.994076
FBgn0015754	36791	Lis-1	0.0430055	6.3194	0.126451	0.72214	0.940359
FBgn0015756	34526	RpL9	0.0580119	11.1838	0.0291456	0.864443	0.975286
FBgn0015765	42866	Mpk2	0.0589883	5.56629	0.251655	0.615912	0.904576
FBgn0015772	35154	Nak	-0.0328227	6.09805	0.0790777	0.778551	0.955404
FBgn0015776	33952	nrv1	0.13916	6.25236	1.31204	0.252025	0.722696
FBgn0015777	33953	nrv2	0.059696	6.74418	0.27175	0.60216	0.901837
FBgn0015778	47998	rin	0.276768	11.2095	0.65176	0.419484	0.828516
FBgn0015781	42284	P5cr	0.0145259	4.06473	0.00645407	0.935969	0.988097
FBgn0015789	33025	Rab10	0.10887	6.08728	0.796739	0.37207	0.802729
FBgn0015790	42501	Rab11	0.251582	8.82434	3.12011	0.0773316	0.520323
FBgn0015791	34840	Rab14	0.20534	6.24116	2.84633	0.0915827	0.542714
FBgn0015793	38930	Rab19	0.30485	3.53249	2.22434	0.135851	0.606324
FBgn0015794	44360	Rab18	0.101304	6.27537	0.658604	0.417053	0.828152
FBgn0015795	42841	Rab7	0.179175	7.84222	2.46686	0.11627	0.583401
FBgn0015797	34636	Rab6	0.114784	7.02672	1.0929	0.29583	0.752846
FBgn0015799	31027	Rbf	0.0612291	3.86511	0.113665	0.736009	0.941672
FBgn0015801	37968	Reg-5	-0.118484	5.51883	0.977251	0.322878	0.769941
FBgn0015803	35306	rtGEF	-0.0972578	6.56012	0.706641	0.400561	0.817181
FBgn0015805	38565	Rpd3	-0.120867	6.5527	1.0687	0.30124	0.756011
FBgn0015806	38654	S6k	0.129757	8.63804	0.938091	0.332769	0.778629
FBgn0015808	44183	ScpX	0.107566	5.6821	0.857327	0.354488	0.791869
FBgn0015816	NA	NA	-0.0981522	5.10473	0.593892	0.440918	0.839375
FBgn0015818	31558	Spx	0.100825	6.51924	0.740831	0.389395	0.810241
FBgn0015828	39313	TfIIEalpha	0.0167693	7.47525	0.0233015	0.878676	0.977812
FBgn0015829	38527	TfIIEbeta	0.162886	4.30905	1.04684	0.306236	0.759604
FBgn0015834	33710	Trip1	-0.0182941	8.45587	0.0215071	0.883406	0.979633
FBgn0015838	35922	Vang	0.039254	7.84976	0.118983	0.73014	0.941359
FBgn0015903	37734	apt	-0.0154464	3.16507	0.0034622	0.953079	0.991775
FBgn0015905	33282	ast	0.024703	5.64769	0.0473946	0.827661	0.964408
FBgn0015907	43862	bl	0.144828	7.15511	1.68648	0.194066	0.678891
FBgn0015924	33219	crq	-0.0321399	5.50756	0.0630512	0.801737	0.959773
FBgn0015925	36809	csul	-0.0711882	5.4817	0.359403	0.548838	0.885599
FBgn0015926	32459	dah	-0.193733	4.96587	2.09271	0.148003	0.621882
FBgn0015929	35679	dpa	-0.223403	7.48066	4.04907	0.0441956	0.419319
FBgn0015949	49636	hrg	-0.00760182	7.57631	0.00469402	0.945377	0.990261
FBgn0016013	45577	Faa	-0.31658	3.16287	1.66	0.197604	0.679297
FBgn0016031	38610	lama	-0.0730959	5.63288	0.425107	0.5144	0.873404
FBgn0016032	35623	lbm	-0.152822	3.60639	0.58659	0.443741	0.839802
FBgn0016034	40489	mael	-0.061086	4.9918	0.179242	0.672025	0.922195
FBgn0016038	31006	mod(r)	0.0540647	6.01048	0.217773	0.640742	0.914489
FBgn0016041	44978	Tom40	0.14856	7.15466	1.71488	0.190353	0.673763
FBgn0016054	35322	phr6-4	-0.199745	4.65441	1.53401	0.215512	0.689718
FBgn0016059	37007	Sema-1b	-0.00331349	5.86865	0.000884399	0.976275	0.994076
FBgn0016070	39034	smg	-0.134531	4.56704	0.749225	0.386722	0.808331
FBgn0016075	33726	vkg	-0.00178733	8.81603	0.000158752	0.989947	0.996417
FBgn0016076	33759	vri	-0.0700387	6.39173	0.319211	0.572082	0.895621
FBgn0016078	35966	wun	-0.138904	3.95842	0.595901	0.440146	0.839375
FBgn0016080	44660	xmas-1	-0.234609	4.08726	1.88365	0.16992	0.651937
FBgn0016081	39122	fry	-0.211783	6.58797	3.31922	0.0684742	0.495452
FBgn0016119	42759	ATPsyn-Cf6	0.234049	7.72936	3.71139	0.0540423	0.453632
FBgn0016120	42291	ATPsyn-d	0.19721	7.69282	3.14713	0.0760604	0.517922
FBgn0016122	34189	Acer	-0.0384973	2.48993	0.0153754	0.901317	0.984544
FBgn0016126	43792	CaMKI	0.13035	4.47592	0.708514	0.399938	0.817181
FBgn0016131	36854	Cdk4	-0.0740135	4.93615	0.294778	0.587175	0.899319
FBgn0016641	37461	PTP-ER	-0.317309	5.15612	6.25539	0.0123816	0.2521
FBgn0016650	42133	Lgr1	-0.567807	2.20928	2.79425	0.0946031	0.550014
FBgn0016672	41701	Ipp	0.0937093	5.48791	0.620677	0.430796	0.832786
FBgn0016685	43560	Nlp	0.357445	8.54126	7.94477	0.00482265	0.151035
FBgn0016687	37922	Nurf-38	-0.052333	7.07355	0.22794	0.633055	0.910294
FBgn0016691	41845	Oscp	0.0110818	7.71187	0.00927834	0.923263	0.985397
FBgn0016693	41569	Past1	0.0799109	8.63218	0.328143	0.566755	0.893982
FBgn0016694	45588	Pdp1	0.345091	7.80194	9.32538	0.00226001	0.0944842
FBgn0016696	40292	Pitslre	0.104771	7.29274	0.903344	0.341887	0.785723
FBgn0016697	36951	Prosalpha5	0.0673005	7.02844	0.373333	0.541193	0.883142
FBgn0016698	33555	Ptpa	-0.271177	4.67342	3.37111	0.0663489	0.489895
FBgn0016700	42524	Rab1	0.101548	8.55292	0.620169	0.430984	0.832786
FBgn0016701	36992	Rab4	0.137957	5.9845	1.36025	0.243493	0.717641
FBgn0016726	37430	RpL29	0.0281066	10.6491	0.0095299	0.922233	0.984719
FBgn0016754	42824	sba	-0.137567	5.23745	1.17053	0.279293	0.74507
FBgn0016756	38644	Ubp64E	-0.201864	8.74304	2.16985	0.14074	0.616113
FBgn0016762	37748	angel	-0.143265	4.29669	0.481088	0.48793	0.863151
FBgn0016792	41180	dmt	-0.164375	5.6384	2.04103	0.153106	0.631478
FBgn0016794	38321	dos	-0.200646	6.28998	2.68248	0.101457	0.560642
FBgn0016797	40090	fz2	-0.108596	3.94415	0.347058	0.555784	0.889891
FBgn0016917	42428	Stat92E	-0.0302421	7.03317	0.0611718	0.804653	0.961653
FBgn0016919	35414	nompB	0.373956	1.51379	0.622435	0.430144	0.832641
FBgn0016926	33288	Pino	0.0928592	7.34749	0.709292	0.399679	0.817181
FBgn0016930	34831	smi35A	0.117387	3.04194	0.226303	0.634278	0.910939
FBgn0016970	48373	l(2)k10201	0.193395	2.55268	0.448173	0.503204	0.869154
FBgn0016974	3771807	swaPsi	-0.376855	2.50759	1.27635	0.25858	0.728175
FBgn0016977	44205	spen	0.105598	9.01064	0.353393	0.552199	0.88765
FBgn0016978	33982	snRNP-U1-70K	-0.0266397	5.68071	0.0556043	0.813584	0.962102
FBgn0016983	38824	smid	-0.0537689	5.85484	0.210462	0.646405	0.915564
FBgn0016984	37356	sktl	0.0513695	6.73981	0.190155	0.662787	0.919724
FBgn0017414	36157	cag	0.0988482	3.02368	0.159062	0.690022	0.929243
FBgn0017418	32796	ari-1	0.260133	6.04708	4.51269	0.0336442	0.375626
FBgn0017429	38984	CG5989	0.075116	5.16701	0.35366	0.552049	0.88765
FBgn0017430	38982	Nelf-E	0.0910707	4.41408	0.347595	0.555478	0.889891
FBgn0017457	33201	U2af38	0.130263	6.19792	1.22134	0.269098	0.73729
FBgn0017482	37551	T3dh	-0.716685	2.03008	3.70612	0.0542134	0.453632
FBgn0017545	43768	RpS3A	0.019137	10.4002	0.00521561	0.942427	0.989773
FBgn0017549	36776	Ric	0.0758755	5.65282	0.362075	0.547356	0.885168
FBgn0017550	40683	Rga	-0.16363	5.50443	1.86766	0.171744	0.654449
FBgn0017551	33959	Rca1	-0.377869	3.80355	3.41895	0.064452	0.485096
FBgn0017558	35970	Pdk	0.161402	6.02221	1.51852	0.217843	0.691475
FBgn0017566	31762	ND75	-0.00361136	7.59755	0.00104358	0.974229	0.994076
FBgn0017567	44207	ND23	-0.0658283	6.25912	0.295499	0.586718	0.899319
FBgn0017572	39858	Mo25	0.172891	7.22751	2.38681	0.122363	0.59002
FBgn0017577	41296	Mcm5	-0.155639	7.04682	2.00851	0.156419	0.63694
FBgn0017578	40095	Max	0.361652	5.33631	7.85909	0.00505658	0.155075
FBgn0017579	38983	RpL14	0.0294434	11.1442	0.00769527	0.930097	0.987323
FBgn0017581	44672	Lk6	0.0127086	11.0838	0.00147698	0.969344	0.994076
FBgn0019624	41432	CoVa	0.207306	8.06519	2.31822	0.127866	0.595225
FBgn0019637	40684	Atu	0.173094	6.77864	1.84468	0.174403	0.658046
FBgn0019643	37867	Dat	-0.5045	1.33691	1.24021	0.26543	0.733915
FBgn0019644	39143	ATPsyn-b	0.0998084	7.26893	0.664195	0.415083	0.825586
FBgn0019650	43833	toy	0.149653	5.57095	1.62048	0.203025	0.683604
FBgn0019662	38816	qm	0.10158	5.2276	0.627444	0.428295	0.831283
FBgn0019686	35288	lok	-0.389104	5.92479	10.4243	0.00124366	0.0616904
FBgn0019830	33470	colt	0.0943372	5.66936	0.578059	0.447074	0.840576
FBgn0019886	37912	Letm1	-0.0325212	6.50725	0.0761838	0.782537	0.955989
FBgn0019890	34804	Smg5	0.061682	8.54474	0.234786	0.627998	0.909271
FBgn0019925	41864	Surf4	0.100262	6.89992	0.791742	0.373574	0.803077
FBgn0019932	34396	SamDC	0.237459	2.85493	0.774917	0.3787	0.805337
FBgn0019936	42464	RpS20	0.0487375	10.9513	0.0237209	0.877597	0.977812
FBgn0019938	36617	RpI1	0.0153625	6.15242	0.0114834	0.914661	0.984656
FBgn0019947	40260	Psn	0.00499562	6.9992	0.00205156	0.963873	0.994076
FBgn0019948	37823	Phm	-0.159717	6.28912	1.66335	0.197152	0.678891
FBgn0019949	37586	Cdk9	-0.0404267	4.78789	0.080405	0.776749	0.955404
FBgn0019952	42891	Orct	-0.0597027	6.48894	0.241362	0.623224	0.907457
FBgn0019957	42591	ND42	-0.0365572	6.91593	0.106364	0.744322	0.944145
FBgn0019960	42587	CG6455	-0.0546309	7.12728	0.229221	0.632102	0.909974
FBgn0019968	36718	Khc-73	-0.0666681	5.6229	0.246811	0.619329	0.905532
FBgn0019972	43514	Ice	0.00626831	4.72001	0.00191922	0.965057	0.994076
FBgn0019982	33653	Gs1l	-0.0473197	5.42043	0.148287	0.700178	0.933107
FBgn0019990	43709	Gcn2	-0.0738764	5.49514	0.37973	0.537748	0.881599
FBgn0020018	42939	Ppox	-0.175857	4.66976	1.42717	0.232226	0.707421
FBgn0020224	38961	Cbl	0.0173524	5.48855	0.020144	0.887136	0.979913
FBgn0020235	43507	ATPsyn-gamma	-0.0815204	8.12345	0.517554	0.471887	0.855462
FBgn0020236	36760	ATPCL	-0.00431717	6.89087	0.00147583	0.969356	0.994076
FBgn0020238	42186	14-3-3epsilon	0.369325	11.2789	1.11736	0.290487	0.750475
FBgn0020240	NA	NA	-0.203852	4.99373	2.2456	0.133995	0.603008
FBgn0020245	36614	ttv	-0.108771	5.42977	0.817386	0.365946	0.799638
FBgn0020249	40999	stck	-0.000918745	7.3671	6.85037e-05	0.993396	0.997634
FBgn0020251	38736	sfl	0.102221	3.4794	0.216523	0.641702	0.914489
FBgn0020255	44072	ran	0.179537	10.0784	0.57538	0.448129	0.841708
FBgn0020257	37602	ppa	0.218185	6.9841	2.78549	0.0951215	0.551406
FBgn0020261	32935	pcm	-0.239568	6.43144	4.06728	0.0437215	0.418593
FBgn0020270	34565	mre11	-0.175393	6.90899	2.32449	0.127352	0.593966
FBgn0020272	33119	mst	-0.149419	4.9296	1.16952	0.2795	0.74507
FBgn0020278	42672	loco	-0.119735	7.45031	1.05531	0.304287	0.758846
FBgn0020279	35771	lig	-0.00194782	8.62376	0.000189238	0.989024	0.996417
FBgn0020300	50263	gk	0.234245	1.25359	0.239893	0.624284	0.908105
FBgn0020304	33263	drongo	0.166558	8.63934	1.54086	0.21449	0.688678
FBgn0020305	33269	dbe	0.202048	6.19298	2.77468	0.0957657	0.5523
FBgn0020306	45655	dom	-0.153882	8.41049	1.57107	0.210052	0.686793
FBgn0020309	34592	crol	0.0832464	8.58923	0.391983	0.531259	0.878667
FBgn0020312	37401	CG4050	-0.0590105	6.05861	0.256059	0.612841	0.903732
FBgn0020368	45668	Vha68-1	0.0813984	3.80397	0.16177	0.687532	0.928815
FBgn0020369	33105	Pros45	-0.13351	6.31145	1.22549	0.268286	0.736217
FBgn0020370	36444	TppII	-0.158083	7.10963	2.07883	0.149354	0.626065
FBgn0020372	37786	TM4SF	-0.193539	6.79346	2.51758	0.112583	0.578654
FBgn0020379	41266	Rfx	-0.500137	2.57428	2.90893	0.0880903	0.539163
FBgn0020381	31011	Dredd	-0.161841	4.69962	1.20594	0.272137	0.738658
FBgn0020385	41279	pug	-0.0892308	5.17148	0.497662	0.480529	0.858694
FBgn0020386	38017	Pdk1	-0.029921	6.35966	0.0453919	0.831285	0.966114
FBgn0020388	39431	Pcaf	-0.279717	5.81816	6.20922	0.0127087	0.255301
FBgn0020389	40167	Papss	-0.131723	4.71493	0.765695	0.381552	0.805337
FBgn0020391	36445	Nrk	-0.00225868	3.92378	0.000151303	0.990186	0.996417
FBgn0020392	38909	Nmt	0.0397967	5.82755	0.103925	0.747169	0.944613
FBgn0020407	41971	asun	-0.101225	3.991	0.327426	0.567179	0.893982
FBgn0020412	39241	JIL-1	0.0195698	6.06671	0.0268214	0.86991	0.975935
FBgn0020414	34981	Idgf3	-0.166764	7.42458	2.2689	0.131994	0.600242
FBgn0020415	34979	Idgf2	-0.163067	3.42668	0.484068	0.486585	0.862762
FBgn0020416	34978	Idgf1	-0.296216	5.16657	5.58466	0.0181184	0.289856
FBgn0020440	37233	Fak	-0.103087	5.56305	0.760288	0.383238	0.806899
FBgn0020443	34658	Elf	0.0713372	7.11777	0.399422	0.527388	0.878527
FBgn0020445	43895	E23	-0.0635763	3.58956	0.0750833	0.784074	0.956101
FBgn0020493	42059	Dad	0.0883735	4.22971	0.289174	0.59075	0.899319
FBgn0020496	41602	CtBP	0.211194	9.14836	1.71519	0.190314	0.673763
FBgn0020497	34167	emb	0.115749	7.19303	0.943307	0.331429	0.777485
FBgn0020503	35042	CLIP-190	-0.0596455	5.70531	0.288982	0.590874	0.899319
FBgn0020510	41718	Abi	0.0228663	7.77502	0.040791	0.839942	0.966986
FBgn0020513	32228	ade5	0.0606006	6.43577	0.257776	0.611652	0.903565
FBgn0020545	33265	kraken	0.113818	7.91338	0.977905	0.322717	0.769941
FBgn0020616	33974	SA	-0.0379239	5.18634	0.0892751	0.765101	0.948932
FBgn0020618	34070	Rack1	-0.0667194	11.3606	0.0348885	0.851829	0.970747
FBgn0020620	36554	RN-tre	0.0869699	6.57213	0.522431	0.469806	0.855256
FBgn0020621	35950	Pkn	-0.0325766	5.69331	0.0644852	0.799542	0.959579
FBgn0020622	33203	Pi3K21B	0.176795	6.58656	2.32905	0.12698	0.593966
FBgn0020626	42985	Osbp	-0.132527	6.35755	1.21684	0.269983	0.737364
FBgn0020633	39014	Mcm7	-0.139214	6.89477	1.50871	0.219337	0.691998
FBgn0020647	42843	KrT95D	0.136707	7.43317	1.36222	0.243154	0.717397
FBgn0020653	31760	Trxr-1	-0.0657675	9.09341	0.170895	0.679317	0.924811
FBgn0020655	39417	Gap69C	0.0274815	6.65525	0.0562335	0.812551	0.962102
FBgn0020660	3355041	eIF-4B	0.262669	5.88013	4.81351	0.0282374	0.345535
FBgn0020762	33636	Atet	-0.53467	3.72976	6.89516	0.00864296	0.211524
FBgn0020764	37815	Alas	0.0177994	6.15414	0.0216427	0.883042	0.979523
FBgn0020766	36547	Aats-phe	-0.0262067	5.7248	0.0562429	0.812536	0.962102
FBgn0020767	36643	Spred	0.0527611	6.69245	0.20684	0.649256	0.915564
FBgn0020887	48071	Su(z)12	-0.0111737	6.55525	0.00898672	0.924475	0.985787
FBgn0020908	3355102	Scp1	0.000396372	1.08778	7.59963e-07	0.999304	0.999736
FBgn0020909	32338	Rtc1	-0.0609493	4.44797	0.150726	0.697842	0.93218
FBgn0020910	41347	RpL3	0.11132	12.4497	0.0583536	0.809117	0.962102
FBgn0020930	36408	Dgkepsilon	-0.165632	6.60549	1.88426	0.169851	0.651937
FBgn0021750	41862	Aats-ser	-0.218033	3.96711	1.35613	0.244209	0.717641
FBgn0021760	43901	chb	-0.182469	6.88688	2.22658	0.135654	0.606324
FBgn0021761	34527	Nup154	-0.233108	6.35294	3.72707	0.0535373	0.452183
FBgn0021764	31017	sdk	-0.180815	4.40048	1.23709	0.266032	0.734222
FBgn0021765	32789	scu	-0.168659	6.9725	2.09865	0.14743	0.621593
FBgn0021767	31778	org-1	-0.360325	1.15785	0.518417	0.471518	0.85538
FBgn0021768	39879	nudC	0.268481	5.45758	5.05736	0.0245215	0.328927
FBgn0021795	45680	Tapdelta	0.0751507	7.97595	0.474789	0.490792	0.863373
FBgn0021796	47396	Tor	-0.256959	5.63228	5.15873	0.0231298	0.322551
FBgn0021814	47408	Vps28	-0.194429	6.25223	2.53775	0.111153	0.575706
FBgn0021818	36952	cnk	-0.101798	7.03135	0.860019	0.353733	0.791776
FBgn0021825	44086	Dmn	0.0350356	6.26175	0.0795034	0.777972	0.955404
FBgn0021847	48387	l(2)k14710	0.026656	4.0895	0.0243213	0.87607	0.977812
FBgn0021856	35399	l(2)k14505	-0.0011333	5.38396	8.69636e-05	0.992559	0.997418
FBgn0021872	44226	Xbp1	-0.121546	9.84445	0.318678	0.572403	0.895621
FBgn0021873	33881	Gef26	-0.108547	5.53051	0.793225	0.373127	0.803077
FBgn0021874	33234	Nle	-0.0910344	6.02047	0.621454	0.430508	0.832641
FBgn0021875	45021	Zfrp8	0.0907471	4.971	0.460164	0.497548	0.86482
FBgn0021895	47457	ytr	0.151912	6.9206	1.84814	0.174	0.658046
FBgn0021906	44390	RFeSP	0.0380786	7.00497	0.108753	0.741568	0.944145
FBgn0021944	44701	Coprox	-0.183676	7.46922	2.64794	0.103684	0.56411
FBgn0021953	44227	Fatp	-0.135826	5.65343	1.32817	0.249131	0.721485
FBgn0021967	44228	Pdsw	0.13533	5.91994	1.21143	0.271049	0.73749
FBgn0021979	37661	l(2)k09913	-0.179691	7.22464	2.33679	0.12635	0.593056
FBgn0021995	44087	Rs1	0.254071	6.53794	3.76676	0.052281	0.447517
FBgn0022023	45682	eIF-3p40	0.0855503	9.22966	0.25986	0.610216	0.903106
FBgn0022027	35847	Vps25	0.22834	5.46996	3.43715	0.0637454	0.481862
FBgn0022029	36953	l(2)k01209	-0.163349	6.46034	1.83507	0.17553	0.658968
FBgn0022063	NA	NA	-0.17561	6.62925	2.09295	0.14798	0.621882
FBgn0022069	44391	Nnp-1	0.0412415	5.14927	0.10038	0.751374	0.945967
FBgn0022097	44702	Vha36-1	0.0244285	6.86965	0.0356774	0.850183	0.970007
FBgn0022153	33644	l(2)k05819	-0.50724	4.24054	5.59296	0.0180328	0.289526
FBgn0022160	47611	Gpo-1	0.0821071	6.69355	0.504527	0.477518	0.85723
FBgn0022213	35016	Cas	-0.263616	6.28715	4.73314	0.0295869	0.353274
FBgn0022224	35592	ubl	0.274978	4.37711	2.31698	0.127968	0.595225
FBgn0022238	44703	lolal	0.333824	7.71413	8.71233	0.00316064	0.116711
FBgn0022246	44392	Rpp30	-0.0448661	3.75956	0.0551332	0.81436	0.962102
FBgn0022268	34427	KdelR	0.0595026	7.38209	0.2858	0.592925	0.900311
FBgn0022288	46662	l(2)09851	-0.0074584	5.27394	0.00360231	0.95214	0.991739
FBgn0022338	42273	dnk	-0.0945808	7.06061	0.739942	0.389679	0.810241
FBgn0022343	37987	CG3760	0.0687169	6.57609	0.339721	0.55999	0.890499
FBgn0022344	42020	CG10340	-0.239186	4.83127	2.47008	0.116032	0.583401
FBgn0022349	43741	CG1910	0.106548	6.46897	0.754836	0.384949	0.807376
FBgn0022355	32821	Tsf1	-0.147255	1.3261	0.100252	0.751527	0.945967
FBgn0022359	41313	Sodh-2	-0.123661	4.63763	0.654916	0.418361	0.828345
FBgn0022361	43797	Pur-alpha	0.492085	4.66166	11.0671	0.000878709	0.0523753
FBgn0022382	36041	Pka-R2	0.472456	5.58819	17.5949	2.7332e-05	0.00682034
FBgn0022699	38717	D19B	0.014476	4.41926	0.00884142	0.925086	0.985787
FBgn0022702	38223	Cht2	-0.229255	8.30554	3.69795	0.0544794	0.454467
FBgn0022708	37834	Adk2	0.144934	7.09723	1.67286	0.195875	0.678891
FBgn0022709	39396	Adk1	0.102206	3.7729	0.301001	0.583255	0.898376
FBgn0022710	32485	Ac13E	0.306596	4.76498	4.66888	0.030714	0.359939
FBgn0022720	34292	zf30C	-0.119857	6.59046	1.01322	0.314134	0.766318
FBgn0022724	32792	Taf8	-0.0766701	4.08076	0.165735	0.68393	0.92666
FBgn0022764	36382	Sin3A	-0.186586	7.66933	2.70813	0.0998381	0.55896
FBgn0022768	31404	Pp2C1	0.09145	7.03194	0.636639	0.42493	0.829209
FBgn0022772	35686	Orc1	-0.299998	6.10013	6.02942	0.0140694	0.268328
FBgn0022774	40145	Oat	-0.127349	6.53605	1.19238	0.27485	0.740639
FBgn0022786	31680	Hira	-0.0154099	5.42335	0.0126785	0.910349	0.984656
FBgn0022787	41943	Hel89B	-0.0563358	8.42613	0.196161	0.657838	0.917893
FBgn0022893	35418	Df31	0.375943	12	0.799949	0.371109	0.8026
FBgn0022935	38718	D19A	-0.0738827	4.44273	0.224865	0.635357	0.9113
FBgn0022936	40429	CycH	0.138726	4.72085	0.895534	0.343982	0.786737
FBgn0022942	44409	Cbp80	0.0585113	6.13017	0.250781	0.616526	0.904576
FBgn0022943	42166	Cbp20	0.0140647	5.09895	0.0122187	0.911983	0.984656
FBgn0022959	39377	yps	0.207834	9.45938	1.21403	0.270536	0.737364
FBgn0022960	35609	vimar	0.0700212	5.65134	0.372723	0.541524	0.883142
FBgn0022984	37559	qkr58E-3	0.03914	4.34541	0.044496	0.832934	0.966114
FBgn0022985	37562	qkr58E-2	0.221457	6.69111	3.47088	0.0624579	0.479621
FBgn0022986	37561	qkr58E-1	0.014076	5.0475	0.0115645	0.914362	0.984656
FBgn0022987	36966	qkr54B	0.0140948	5.37832	0.0123387	0.911553	0.984656
FBgn0023000	38058	mth	0.00719941	4.07137	0.0017643	0.966496	0.994076
FBgn0023023	40675	CRMP	-0.0695147	4.8203	0.191163	0.66195	0.919724
FBgn0023081	37858	gek	-0.308747	4.7764	3.70375	0.0542905	0.453632
FBgn0023083	44233	fray	-0.0997296	5.49863	0.646954	0.421204	0.828519
FBgn0023094	40162	cyc	0.015999	6.77623	0.0194497	0.889085	0.979913
FBgn0023095	39493	caps	-0.200382	3.56668	0.868451	0.351384	0.790061
FBgn0023097	44235	bon	-0.288548	4.55309	3.24328	0.0717169	0.505916
FBgn0023129	39085	aay	0.0757568	4.32274	0.189441	0.663382	0.919724
FBgn0023130	31127	a6	-0.100048	4.61373	0.38131	0.536903	0.881599
FBgn0023143	35998	Uba1	-0.116376	8.89588	0.639078	0.424045	0.828912
FBgn0023167	36306	SmD3	0.465191	6.45571	9.32319	0.00226271	0.0944842
FBgn0023169	43904	SNF1A	-0.233632	5.89637	4.09908	0.0429064	0.416813
FBgn0023170	37849	RpL39	0.340682	10.2032	1.42073	0.233284	0.70751
FBgn0023171	35746	rnh1	-0.153212	5.59105	1.76596	0.183883	0.666541
FBgn0023172	36915	RhoGEF2	-0.14328	6.55929	1.48764	0.222583	0.695607
FBgn0023174	39628	Prosbeta2	0.11587	7.29701	1.10868	0.29237	0.751183
FBgn0023175	36018	Prosalpha7	0.083524	7.43187	0.56264	0.453199	0.844688
FBgn0023177	45031	Pp4-19C	-0.0521083	6.83016	0.206578	0.649463	0.915564
FBgn0023180	36017	Orc6	-0.000857682	4.23671	2.04076e-05	0.996396	0.998813
FBgn0023181	37970	Orc4	-0.110642	4.90412	0.645255	0.421814	0.828519
FBgn0023211	37237	Elongin-C	0.37854	7.02986	11.2201	0.000809162	0.0502564
FBgn0023212	42435	Elongin-B	0.0720251	7.47594	0.431633	0.511189	0.872582
FBgn0023213	43839	eIF4G	-0.0182176	7.06848	0.0278627	0.867432	0.975407
FBgn0023214	37149	edl	0.428515	7.09033	14.6706	0.000128025	0.0178535
FBgn0023215	31331	Mnt	0.156437	7.18201	1.83732	0.175266	0.65856
FBgn0023216	31329	Parg	-0.180672	4.27591	1.23721	0.266008	0.734222
FBgn0023388	35378	Dap160	0.0139912	6.46609	0.0123676	0.91145	0.984656
FBgn0023395	40111	Chd3	-0.0467423	5.16718	0.130842	0.717561	0.938067
FBgn0023407	34767	B4	-0.0536135	5.62965	0.212318	0.644957	0.915123
FBgn0023416	35419	Ac3	0.113078	6.04315	0.930968	0.334612	0.780655
FBgn0023423	42504	slmb	-0.0629629	6.22268	0.266435	0.605733	0.902434
FBgn0023441	44095	fus	-0.126784	5.32202	1.04995	0.305519	0.759604
FBgn0023458	31557	Rbcn-3A	-0.302691	6.24291	5.34347	0.0208001	0.310572
FBgn0023477	37804	Tal	-0.0543898	7.58805	0.242076	0.622711	0.907113
FBgn0023479	39048	Tequila	0.481151	2.13311	1.47455	0.224629	0.70042
FBgn0023489	33239	Pph13	-0.627609	1.23463	1.72456	0.189107	0.671966
FBgn0023506	31780	Es2	-0.157197	4.61999	1.10479	0.293218	0.751844
FBgn0023507	31184	CG3835	-0.154826	6.83123	1.87456	0.170954	0.653847
FBgn0023508	31157	Ocrl	-0.085755	6.50593	0.528165	0.467379	0.853823
FBgn0023509	31153	mip130	0.00222046	4.96932	0.00024779	0.987441	0.996417
FBgn0023510	31155	Rbcn-3B	-0.175031	4.89858	1.30941	0.252501	0.722696
FBgn0023511	31154	Edem1	-0.0560546	4.59543	0.142921	0.705394	0.935169
FBgn0023512	31156	eIF2B-epsilon	-0.286392	5.714	6.57559	0.0103387	0.230856
FBgn0023513	31142	CG14803	-0.205103	5.24587	2.295	0.129791	0.596944
FBgn0023514	31146	CG14805	0.00508984	4.97077	0.00146903	0.969426	0.994076
FBgn0023515	31139	CG14814	-0.166707	4.4174	1.01655	0.313338	0.765075
FBgn0023516	31141	Pex5	0.0399121	4.47494	0.063861	0.800494	0.959579
FBgn0023517	31143	Pgam5	-0.271326	5.03703	4.09994	0.0428848	0.416813
FBgn0023518	31149	trr	-0.188791	5.1428	1.8146	0.177957	0.659303
FBgn0023519	31150	mRpL16	0.150091	4.92014	1.23027	0.267355	0.735401
FBgn0023520	2768908	CG3857	-0.0417459	5.37281	0.105906	0.744854	0.944353
FBgn0023521	31160	CG3587	0.136458	3.87878	0.549693	0.458443	0.847724
FBgn0023522	31158	CG11596	0.0390685	5.63863	0.116978	0.732336	0.941359
FBgn0023525	31209	CG3191	0.118839	2.35942	0.14411	0.704229	0.935169
FBgn0023526	31217	CG2865	0.26021	7.90866	5.11014	0.0237863	0.324963
FBgn0023527	31213	CG3071	-0.175637	4.31466	1.16719	0.279979	0.74507
FBgn0023528	31214	CG2924	-0.0436406	5.72674	0.111092	0.738905	0.942895
FBgn0023529	31215	CG2918	0.206492	7.75878	2.97047	0.0847971	0.533846
FBgn0023530	31119	CG3740	-0.230808	4.80364	2.50013	0.113837	0.581549
FBgn0023531	31121	CG32809	-0.0706049	5.7149	0.404814	0.524614	0.876847
FBgn0023535	46717	arg	0.245292	2.26983	0.494331	0.482002	0.859672
FBgn0023536	30994	CG3156	-0.198349	3.46153	0.900697	0.342595	0.786737
FBgn0023537	30995	CG17896	-0.272586	7.74913	5.74964	0.016492	0.281507
FBgn0023540	31189	CG3630	-0.136706	4.21353	0.478685	0.489019	0.863151
FBgn0023541	45706	Cyp4d14	-0.065764	2.0645	0.022655	0.880358	0.97812
FBgn0023542	31195	Nmd3	0.110506	4.86211	0.634025	0.425883	0.829433
FBgn0023545	31163	CG4406	0.219062	4.57144	2.07814	0.149422	0.626065
FBgn0023549	31198	Mct1	0.0467392	2.06056	0.0115559	0.914394	0.984656
FBgn0024179	44096	wit	-0.421009	2.00087	1.11783	0.290386	0.750475
FBgn0024183	34885	vig	0.272026	7.51428	5.91009	0.0150544	0.271737
FBgn0024187	43905	syd	-0.0179407	4.57898	0.0138122	0.906444	0.984656
FBgn0024188	44724	san	0.22189	5.22258	3.19734	0.0737582	0.511875
FBgn0024191	44238	sip1	0.225705	2.80284	0.705797	0.400843	0.817181
FBgn0024194	44098	rasp	0.0960211	4.93331	0.504297	0.477618	0.85723
FBgn0024196	36963	robl	-0.169538	6.44664	2.04707	0.152499	0.631421
FBgn0024222	44432	ird5	-0.147666	3.80705	0.632984	0.426263	0.829689
FBgn0024227	34504	ial	-0.251288	5.72998	4.56089	0.03271	0.369855
FBgn0024230	44433	Hs2st	-0.00480631	4.77512	0.00106117	0.974013	0.994076
FBgn0024234	37778	gbb	-0.0315418	5.51482	0.0645088	0.799506	0.959579
FBgn0024236	38976	foi	-0.0575538	7.19242	0.249197	0.617641	0.90468
FBgn0024238	32721	Fim	0.291821	7.24803	4.65381	0.0309846	0.359939
FBgn0024245	35207	dnt	0.025096	4.00085	0.0191601	0.889908	0.979933
FBgn0024248	64880	chico	-0.144463	4.72778	0.615365	0.432775	0.834718
FBgn0024250	31665	brk	0.194433	4.85468	1.91788	0.166091	0.650199
FBgn0024251	3772670	bbx	-0.91816	1.13542	3.21351	0.0730325	0.511158
FBgn0024273	43402	WASp	-0.0316307	5.84964	0.0744633	0.784946	0.956101
FBgn0024277	43974	trio	-0.0755401	7.36969	0.400788	0.526683	0.878527
FBgn0024285	34312	Srp54	9.78262e-05	7.18308	7.62694e-07	0.999303	0.999736
FBgn0024291	34708	Sir2	-0.103928	5.3106	0.696435	0.403984	0.81908
FBgn0024314	43978	Plap	-0.108668	6.79217	0.916604	0.338368	0.78351
FBgn0024320	34358	Npc1a	-0.413314	4.52138	7.31736	0.00682918	0.187406
FBgn0024321	41747	NK7.1	0.3608	5.67161	9.68452	0.00185827	0.0837467
FBgn0024326	41020	Mkk4	0.0522439	6.81435	0.205426	0.650376	0.915564
FBgn0024329	42253	Mekk1	-0.183749	7.17066	2.85363	0.0911678	0.542714
FBgn0024330	44728	MED6	0.112973	4.72511	0.621842	0.430364	0.832641
FBgn0024332	31449	Mcm3	-0.210304	7.30936	3.55991	0.0591909	0.471814
FBgn0024352	33202	Hop	0.0220528	8.15188	0.038164	0.845114	0.969755
FBgn0024360	31081	CG11418	-0.241745	5.66776	4.62953	0.0314261	0.362923
FBgn0024361	31080	Tsp2A	0.159951	6.12717	1.81792	0.177561	0.659303
FBgn0024362	31079	CG11412	0.0834494	6.8111	0.472097	0.492024	0.863373
FBgn0024364	31083	CG11417	0.361641	6.51396	5.89262	0.0152044	0.271737
FBgn0024365	31082	CG12773	0.0789721	6.5806	0.464656	0.495456	0.864393
FBgn0024366	31078	CG11409	-0.035917	1.90769	0.00917559	0.923688	0.985397
FBgn0024371	35381	E2f2	-0.142579	5.83867	1.60276	0.205512	0.683721
FBgn0024432	42199	Dlc90F	0.192435	7.82985	2.90519	0.0882949	0.539163
FBgn0024491	41965	Bin1	-0.100507	6.25326	0.636497	0.424982	0.829209
FBgn0024509	44437	sec13	-0.13887	7.53466	1.59253	0.206964	0.684732
FBgn0024510	46719	dlt	-0.14389	2.61761	0.257183	0.612062	0.903565
FBgn0024542	38795	Neos	0.0177661	3.67342	0.00842408	0.926871	0.985967
FBgn0024555	41675	flfl	-0.0738737	6.93481	0.426384	0.513769	0.873404
FBgn0024556	44438	EfTuM	-0.0640212	7.94366	0.307381	0.579292	0.897223
FBgn0024558	42663	Dph5	0.055162	6.92593	0.244034	0.621308	0.906903
FBgn0024689	35054	fws	-0.121953	4.91129	0.798898	0.371423	0.8026
FBgn0024698	44250	Cpsf160	-0.25501	4.78715	3.22061	0.0727166	0.510398
FBgn0024728	43809	Slip1	0.146308	5.99161	1.53249	0.215739	0.689971
FBgn0024732	36290	Drep-1	0.187271	5.70631	2.86462	0.0905469	0.54145
FBgn0024733	43864	RpL10	0.0882702	11.6492	0.0525869	0.818622	0.962105
FBgn0024734	34952	PRL-1	0.225517	7.57637	4.22094	0.0399282	0.405327
FBgn0024754	36726	Flo-1	0.265531	7.53959	5.01214	0.0251702	0.330431
FBgn0024804	3354919	Dbp80	0.0898522	6.04874	0.592221	0.441562	0.839575
FBgn0024806	252479	DIP2	-0.165458	5.43783	1.66696	0.196666	0.678891
FBgn0024807	43981	DIP1	-0.101285	6.92339	0.664651	0.414923	0.825586
FBgn0024811	43775	Crk	0.0448809	5.28423	0.0871358	0.76785	0.950458
FBgn0024814	40221	Clc	0.176696	7.78235	2.38901	0.122191	0.589887
FBgn0024833	41150	AP-47	-0.213274	6.33977	3.11905	0.0773817	0.520323
FBgn0024841	43499	Pcd	-0.145951	5.36394	1.42986	0.231788	0.706742
FBgn0024846	34780	p38b	-0.0666564	4.85257	0.200598	0.654239	0.916331
FBgn0024887	40242	kin17	0.0339637	4.72328	0.0557261	0.813383	0.962102
FBgn0024889	40160	Kap-alpha1	0.0390633	5.60987	0.121762	0.727132	0.940942
FBgn0024891	43757	ferrochelatase	-0.101323	7.25282	0.806492	0.369159	0.800671
FBgn0024909	40934	Taf7	-0.110339	4.19381	0.429818	0.512078	0.873274
FBgn0024912	40816	agt	-0.227448	5.31422	3.47196	0.0624172	0.479621
FBgn0024920	33499	Ts	-0.131909	7.13993	1.4437	0.229541	0.706008
FBgn0024921	38721	Trn	0.209024	7.03574	3.16797	0.0750955	0.517922
FBgn0024945	38029	NitFhit	-0.265273	4.18248	2.44464	0.117927	0.585752
FBgn0024947	33495	NTPase	-0.129863	6.72073	1.2677	0.260198	0.729728
FBgn0024956	36130	Mat1	0.00108502	5.16658	7.3893e-05	0.993141	0.997634
FBgn0024957	41269	Irp-1B	-0.0687988	6.25601	0.289371	0.590624	0.899319
FBgn0024958	42689	Irp-1A	-0.25469	6.00999	4.41405	0.035644	0.384571
FBgn0024973	31261	CG2701	0.0442524	6.15526	0.149328	0.699178	0.932952
FBgn0024975	31267	CG2712	-0.387835	2.88295	2.23065	0.135297	0.60568
FBgn0024977	31264	CG2709	-0.238931	4.77738	2.8154	0.0933634	0.546987
FBgn0024983	31001	CG4293	0.122812	4.75528	0.619257	0.431324	0.833223
FBgn0024985	31090	CG11448	0.0522953	6.36462	0.189293	0.663506	0.919724
FBgn0024986	44736	CG3719	-0.00729666	5.5748	0.00409931	0.94895	0.990515
FBgn0024987	31086	ssx	-0.100977	6.42125	0.717003	0.397129	0.816988
FBgn0024991	31260	CG2694	-0.249523	5.12555	3.23711	0.0719874	0.506723
FBgn0024992	31253	CG2658	-0.0813215	6.67791	0.46146	0.496943	0.86456
FBgn0024993	31254	CG2662	0.10473	3.9331	0.325622	0.568249	0.894236
FBgn0024994	31255	Csat	-0.0567768	4.94368	0.179299	0.671977	0.922195
FBgn0024995	31257	CG2680	-0.830214	1.25037	3.02031	0.0822276	0.528114
FBgn0024996	31256	eIF2B-beta	-0.0261615	5.68371	0.0550404	0.814514	0.962102
FBgn0024997	31258	CG2681	-0.233306	2.04456	0.437984	0.508097	0.871163
FBgn0024998	31259	CG2685	0.0856474	5.16901	0.44386	0.505265	0.870639
FBgn0025109	44441	Bem46	0.0548183	4.9393	0.156069	0.692802	0.929899
FBgn0025111	32008	Ant2	0.0322708	5.30726	0.0692025	0.792502	0.957246
FBgn0025117	34294	und	-0.054511	8.3568	0.205775	0.650099	0.915564
FBgn0025140	42595	pit	0.189896	5.72676	1.95999	0.161514	0.643045
FBgn0025185	35682	az2	-0.0659844	4.65285	0.195821	0.658115	0.918107
FBgn0025186	37542	ari-2	0.023162	4.76142	0.0265212	0.870634	0.976309
FBgn0025286	35988	RpL31	0.0663136	11.1676	0.038319	0.844804	0.969755
FBgn0025335	37782	CG4585	-0.126708	5.6314	1.14114	0.285411	0.747509
FBgn0025336	37787	CG4882	0.0644961	4.67417	0.174595	0.67606	0.92379
FBgn0025352	37784	Thiolase	-0.359831	6.56872	9.6226	0.00192197	0.0859629
FBgn0025355	45739	SuUR	-0.0341096	4.65581	0.0520463	0.81954	0.962105
FBgn0025366	34419	Ip259	0.271988	8.54064	3.90219	0.0482232	0.439031
FBgn0025373	36209	Fpps	-0.213499	7.27165	3.51731	0.0607308	0.476496
FBgn0025381	31105	rush	0.0232524	8.4011	0.0349832	0.851631	0.970747
FBgn0025382	31103	Rab27	0.0491855	6.21233	0.139637	0.708643	0.936189
FBgn0025383	31102	CG14780	-0.0875827	3.87536	0.199914	0.65479	0.916522
FBgn0025388	31393	CG12179	-0.222094	3.39958	0.931728	0.334414	0.780655
FBgn0025390	31111	Mur2B	-0.0952666	4.52801	0.389205	0.532718	0.879454
FBgn0025391	31129	Scgdelta	0.868482	1.84435	3.55239	0.0594597	0.473053
FBgn0025394	31110	inc	0.247228	6.48144	4.09647	0.0429728	0.416813
FBgn0025455	39961	CycT	0.0868253	7.35289	0.462909	0.496267	0.86456
FBgn0025456	42092	CREG	0.0657962	5.4697	0.286634	0.592386	0.900148
FBgn0025457	43490	Bub3	-0.0644551	5.94549	0.288711	0.591048	0.899319
FBgn0025463	32268	Bap60	-0.154658	6.42946	1.47	0.225345	0.701569
FBgn0025469	35773	slv	-0.00850566	3.60731	0.00180901	0.966074	0.994076
FBgn0025519	36808	fidipidine	0.0455566	5.20612	0.118027	0.731184	0.941359
FBgn0025525	44254	bab2	0.0763579	4.27712	0.225164	0.635133	0.911155
FBgn0025549	31664	unc-119	0.111321	6.09998	0.919695	0.337555	0.783342
FBgn0025558	39857	CG4101	0.126859	5.01189	0.933096	0.33406	0.780599
FBgn0025571	43912	SF1	-0.158558	6.44395	1.80773	0.178781	0.659697
FBgn0025574	42821	Pli	0.144717	5.9169	1.4984	0.220918	0.694514
FBgn0025582	39877	Int6	-0.0387487	9.64077	0.0386475	0.844149	0.969755
FBgn0025592	43913	Gyk	-0.207032	5.13815	2.44331	0.118027	0.58576
FBgn0025608	35129	Faf	0.0988131	6.72376	0.736324	0.390841	0.810361
FBgn0025615	31399	Torsin	-0.128446	6.40346	1.11551	0.290887	0.750475
FBgn0025616	31028	CG13359	0.442606	1.94695	1.37326	0.241253	0.715817
FBgn0025621	31026	CG16989	-0.146696	6.19125	1.56509	0.210922	0.686793
FBgn0025624	31177	CG4025	-0.118129	5.17691	0.574172	0.448606	0.842232
FBgn0025625	31170	Sik2	-0.148119	4.84226	1.11082	0.291903	0.750941
FBgn0025626	31171	CG4281	0.00264903	6.34983	0.000419601	0.983657	0.996417
FBgn0025628	31174	CG4199	-0.159043	6.7184	1.90511	0.167508	0.650578
FBgn0025629	31176	CG4045	-0.23827	5.07804	3.45461	0.0630755	0.479621
FBgn0025630	31175	CG4061	-0.258757	4.95614	2.9193	0.0875257	0.538817
FBgn0025631	31168	moody	0.328017	4.12158	3.28681	0.0698388	0.499689
FBgn0025632	31169	CG4313	0.0863676	2.57855	0.0906181	0.763393	0.94865
FBgn0025633	31004	CG13366	-0.0356947	5.60823	0.089031	0.765413	0.949003
FBgn0025634	31013	CG13367	-0.120354	4.36823	0.584702	0.444475	0.839802
FBgn0025635	47718	CG17829	-0.0154751	4.90178	0.007392	0.931485	0.987503
FBgn0025637	31016	skpA	0.154035	7.62113	1.94886	0.16271	0.646275
FBgn0025638	31014	Roc1a	0.00447743	6.93863	0.00160849	0.968009	0.994076
FBgn0025639	31015	Hmt4-20	-0.216439	6.12657	3.47543	0.0622865	0.479621
FBgn0025640	31007	CG13369	0.0852627	6.84057	0.546457	0.459769	0.84869
FBgn0025641	31075	DAAM	-0.335646	4.58597	4.52943	0.0333167	0.373663
FBgn0025642	31074	CG32812	-0.394026	2.48543	1.38949	0.238491	0.714797
FBgn0025674	49816	CycK	0.0542102	7.5524	0.225454	0.634916	0.911155
FBgn0025676	38088	CkIIalpha-i3	0.0463034	3.91831	0.0643981	0.799675	0.959579
FBgn0025678	34976	CaBP1	0.066292	7.92552	0.32609	0.56797	0.894115
FBgn0025681	48421	CG3558	-0.141419	7.28837	1.67768	0.195233	0.678891
FBgn0025682	38145	scf	0.0758548	8.83213	0.274603	0.600261	0.90125
FBgn0025683	33171	CG3164	-0.0586425	7.19389	0.26704	0.605324	0.902434
FBgn0025684	33650	MFS18	0.03517	4.60749	0.0555219	0.813719	0.962102
FBgn0025687	34064	LKR	-0.198288	6.79409	2.50038	0.113819	0.581549
FBgn0025693	35513	CG11163	-0.348235	4.74324	3.64574	0.0562129	0.461919
FBgn0025697	34024	santa-maria	-0.100543	2.8026	0.138492	0.709785	0.936623
FBgn0025700	34314	CG5885	0.0714257	6.76898	0.379621	0.537806	0.881599
FBgn0025702	40461	srpk79D	-0.218655	3.08396	0.700477	0.402623	0.817695
FBgn0025712	38203	CG13920	0.594085	1.12883	1.46148	0.226695	0.702833
FBgn0025716	36956	Bap55	-0.0770872	5.90088	0.475068	0.490665	0.863373
FBgn0025720	37288	Ate1	-0.119948	6.22183	0.981493	0.321831	0.769941
FBgn0025724	45757	beta'Cop	-0.150092	6.66746	1.67137	0.196075	0.678891
FBgn0025725	38199	alphaCop	-0.22102	7.15825	4.05775	0.043969	0.419319
FBgn0025726	43841	unc-13	-0.0127201	7.14388	0.0132737	0.908277	0.984656
FBgn0025739	31394	pon	-0.199025	4.69214	1.51653	0.218146	0.69198
FBgn0025740	43766	plexB	0.4152	4.09017	5.93066	0.0148797	0.271737
FBgn0025741	43832	plexA	0.0395214	6.91241	0.115605	0.733851	0.941359
FBgn0025742	33845	mtm	0.0585027	5.36176	0.216217	0.641938	0.914489
FBgn0025743	32631	mbt	0.12645	6.6807	0.993872	0.318798	0.769257
FBgn0025777	33944	homer	0.230903	5.01412	2.8366	0.0921388	0.543061
FBgn0025781	42753	cdc16	0.347356	3.2169	2.31188	0.128389	0.596043
FBgn0025790	37781	TBPH	-0.0968073	5.3669	0.553284	0.456979	0.846499
FBgn0025800	31738	Smox	-0.182795	6.76869	2.28741	0.130427	0.59808
FBgn0025802	41427	Sbf	-0.29916	4.96987	4.83893	0.0278241	0.342483
FBgn0025806	37850	Rap2l	-0.0775106	4.65937	0.275546	0.599635	0.90125
FBgn0025807	40054	Rad9	-0.212326	3.73075	1.24672	0.264179	0.733213
FBgn0025808	41779	Rad17	-0.0766182	3.36126	0.120438	0.72856	0.941359
FBgn0025809	32529	Paf-AHalpha	0.096836	5.90003	0.715977	0.397467	0.816988
FBgn0025814	44110	Mgstl	0.508198	7.55914	17.9572	2.25928e-05	0.00638546
FBgn0025815	31603	Mcm6	-0.195566	7.04364	3.10573	0.0780175	0.521834
FBgn0025820	38235	JTBR	-0.0343741	4.40347	0.0495572	0.823836	0.962655
FBgn0025825	44446	Hdac3	0.0895396	6.1803	0.620236	0.43096	0.832786
FBgn0025830	36886	IntS8	0.18851	3.93564	1.08955	0.29657	0.753507
FBgn0025832	36887	Fen1	0.0784004	5.59932	0.482601	0.487246	0.863025
FBgn0025836	5740235	RhoGAP1A	-0.305179	5.49082	6.41655	0.0113061	0.242213
FBgn0025839	31190	CG3621	-0.192776	5.55941	2.563	0.109391	0.575011
FBgn0025864	31800	Crag	-0.0650982	7.41536	0.323267	0.569651	0.894949
FBgn0025865	42491	Cortactin	0.149165	8.92042	1.00889	0.315169	0.767137
FBgn0025866	39165	CalpB	-0.143851	5.06902	1.27181	0.259428	0.728783
FBgn0025874	39539	Meics	0.319424	4.15768	3.23113	0.0722508	0.50761
FBgn0025885	35671	Inos	-0.0921913	10.5175	0.11149	0.738455	0.942646
FBgn0025936	43803	Eph	0.176021	5.12526	1.92909	0.164858	0.647268
FBgn0026015	31565	Top3beta	0.0583107	7.22966	0.219885	0.639128	0.913516
FBgn0026056	42484	Rlip	0.0139625	4.1721	0.00677387	0.934405	0.987503
FBgn0026059	41955	Mhcl	0.246267	4.62384	1.64795	0.199238	0.680172
FBgn0026060	31544	Mipp2	-0.216285	2.48628	0.392092	0.531202	0.878667
FBgn0026076	32541	UBL3	0.194559	5.93892	2.56231	0.109439	0.575011
FBgn0026079	45064	Nsun2	-0.246553	5.57218	4.64907	0.0310704	0.359939
FBgn0026080	31362	Tip60	-0.086664	4.7586	0.326977	0.567445	0.893982
FBgn0026083	31363	tyf	-0.0258004	7.57816	0.0488929	0.825001	0.962655
FBgn0026084	31359	cib	0.493889	10.7518	2.73412	0.0982255	0.555884
FBgn0026085	31361	dgt4	0.0528057	4.75833	0.136968	0.711314	0.937213
FBgn0026086	31130	Adar	-0.187296	4.07944	1.07314	0.300238	0.755074
FBgn0026088	31147	CG14818	0.159174	4.86847	1.32977	0.248847	0.721485
FBgn0026089	31145	CG14817	0.370484	4.7181	6.6379	0.00998316	0.227032
FBgn0026090	31137	CG14812	-0.0172748	5.86447	0.0232284	0.878865	0.977812
FBgn0026143	31052	CDC45L	-0.204526	6.0639	3.07295	0.0796048	0.52532
FBgn0026144	31669	CBP	0.0781517	3.94443	0.173799	0.676757	0.92379
FBgn0026147	47729	CG16833	-0.133303	4.57551	0.760069	0.383307	0.806899
FBgn0026148	47730	CG12253	-0.140257	2.41747	0.20909	0.647482	0.915564
FBgn0026149	31890	BCL7-like	0.168	5.76067	2.367	0.123925	0.59139
FBgn0026150	35029	ApepP	-0.206151	5.83477	3.32749	0.068131	0.493682
FBgn0026160	39217	tna	0.209897	5.86026	3.32772	0.0681213	0.493682
FBgn0026169	3772141	snoRNA:Psi18S-1820	1.66925	2.27664	4.10901	0.0426553	0.416813
FBgn0026170	NA	NA	0.319678	10.2475	1.63429	0.201111	0.681459
FBgn0026176	36298	skpB	0.623327	2.68531	4.72436	0.0297382	0.354508
FBgn0026179	40327	siz	-0.245976	3.7034	1.50022	0.220638	0.694334
FBgn0026181	43916	rok	-0.129841	6.50993	0.97176	0.324242	0.770861
FBgn0026189	38372	prominin-like	0.0762203	8.03235	0.458908	0.498135	0.864957
FBgn0026192	32752	par-6	0.171968	7.64878	2.27029	0.131875	0.600177
FBgn0026196	33966	nop5	0.271196	7.09455	5.44122	0.0196669	0.3022
FBgn0026197	43918	noe	0.441504	7.84454	14.909	0.000112823	0.0174269
FBgn0026199	43811	myo	0.147271	5.14119	1.1941	0.274503	0.740639
FBgn0026206	45775	mei-P26	0.204437	7.51051	2.98748	0.0839109	0.532614
FBgn0026207	41562	mbo	0.0540234	5.19798	0.189411	0.663407	0.919724
FBgn0026238	35478	gus	0.102549	5.14286	0.624937	0.429219	0.831984
FBgn0026239	53563	gukh	-0.537926	3.43853	5.68788	0.0170825	0.283987
FBgn0026250	44260	eIF-1A	0.396736	10.2829	2.4242	0.119474	0.586344
FBgn0026252	44747	msk	-0.0848093	8.04921	0.552654	0.457235	0.846762
FBgn0026257	42881	cav	0.128547	5.00657	0.913348	0.339228	0.78397
FBgn0026259	44261	eIF5B	0.153977	8.38471	1.42184	0.2331	0.70751
FBgn0026261	37587	bonsai	0.131921	5.16296	0.998267	0.31773	0.769257
FBgn0026262	43793	bip2	0.172079	7.00145	2.44477	0.117917	0.585752
FBgn0026263	38891	bip1	-0.0823586	4.5695	0.292317	0.58874	0.899319
FBgn0026309	37034	aft	-0.036215	4.53279	0.0555919	0.813604	0.962102
FBgn0026313	252671	X11L	0.0202567	7.15301	0.0344266	0.852802	0.970747
FBgn0026315	41334	Ugt35a	-0.652191	2.56448	2.621	0.105458	0.568348
FBgn0026316	37035	UbcD10	0.107618	5.77546	0.954605	0.32855	0.774581
FBgn0026317	42862	Tsc1	0.148848	6.43833	1.59804	0.206181	0.683946
FBgn0026318	31746	Traf6	0.0459069	2.90694	0.0252205	0.873819	0.977307
FBgn0026319	33638	Traf4	0.0616249	4.89857	0.184729	0.66734	0.921048
FBgn0026323	39659	Tak1	0.0415603	7.05487	0.135778	0.712515	0.937213
FBgn0026324	33468	Taf10b	0.0972413	4.20643	0.330112	0.565593	0.893602
FBgn0026326	35954	Mad1	0.0219721	4.86626	0.0232452	0.878821	0.977812
FBgn0026361	43990	2005-09-01	0.165011	5.35085	1.63402	0.201148	0.681459
FBgn0026369	44263	Sara	-0.304309	5.71999	7.00163	0.00814353	0.205423
FBgn0026370	36706	SRPK	0.142675	7.6735	1.40438	0.235992	0.711707
FBgn0026371	40384	SAK	-0.0967209	4.07567	0.284424	0.593816	0.900656
FBgn0026372	38208	RpL23A	0.0762763	12.2044	0.0303842	0.861621	0.97435
FBgn0026373	34796	RpII33	0.105295	5.58028	0.765183	0.381711	0.805337
FBgn0026374	32531	Rhp	0.00442499	6.32983	0.00134547	0.97074	0.994076
FBgn0026375	32743	RhoGAPp190	0.176148	7.20818	2.07199	0.150026	0.626692
FBgn0026376	44115	Rgl	-0.0550248	3.24117	0.0577294	0.810121	0.962102
FBgn0026378	37246	Rep	-0.262192	4.27895	2.64819	0.103668	0.56411
FBgn0026379	43991	Pten	0.0895569	3.42718	0.124913	0.723766	0.940898
FBgn0026380	41079	Prosbeta3	-0.0726024	7.28169	0.413457	0.52022	0.875661
FBgn0026393	35743	Or43b	-0.245018	3.9428	1.8589	0.172752	0.655781
FBgn0026400	43384	Noa36	0.237697	5.85041	4.03836	0.0444769	0.4202
FBgn0026401	3355136	Nipped-B	0.2582	8.21108	4.50322	0.033831	0.376465
FBgn0026402	44748	NiPp1	-0.0622143	3.84202	0.116096	0.733308	0.941359
FBgn0026404	39173	Nc	-0.17701	5.25093	2.06748	0.15047	0.62732
FBgn0026409	39587	Mpcp	-0.0190246	8.77723	0.0187349	0.891129	0.980406
FBgn0026417	40598	Hus1-like	-0.167011	3.64233	0.658904	0.416947	0.828152
FBgn0026418	39557	Hsc70Cb	0.049804	8.32991	0.175004	0.675702	0.923777
FBgn0026427	36621	Su(var)2-HP2	-0.11923	6.61658	1.04334	0.307046	0.759839
FBgn0026428	32461	HDAC6	-0.20898	4.78732	2.16505	0.14118	0.616469
FBgn0026430	32946	Grip84	-0.114249	5.60648	0.959374	0.327345	0.773962
FBgn0026431	34441	Grip75	0.095847	3.41433	0.179451	0.671845	0.922195
FBgn0026432	39365	Grip163	-0.409641	4.15861	5.89949	0.0151452	0.271737
FBgn0026433	32478	Grip128	-0.144381	4.90507	1.09403	0.295579	0.752541
FBgn0026441	44451	ear	-0.0304848	5.72403	0.0539605	0.81631	0.962102
FBgn0026479	33445	Drp1	-0.153301	6.20628	1.57341	0.209713	0.686743
FBgn0026533	47906	Dek	0.161277	7.74975	1.97705	0.159702	0.641337
FBgn0026562	43230	BM-40-SPARC	-0.17381	9.45403	0.887842	0.346063	0.787633
FBgn0026566	40814	CG1307	0.102771	6.29924	0.711511	0.398943	0.817181
FBgn0026570	48613	CG5704	-0.055593	5.40037	0.204285	0.651284	0.915883
FBgn0026573	36278	CG8290	0.0934516	6.28767	0.58528	0.44425	0.839802
FBgn0026575	32613	hang	-0.0360509	7.82507	0.092652	0.760832	0.94865
FBgn0026576	42849	CG5991	-0.0420266	5.91941	0.127945	0.720572	0.93912
FBgn0026577	35397	CG8677	0.137873	7.4764	0.941719	0.331836	0.777485
FBgn0026582	37407	CG9418	-0.0941153	4.86704	0.461281	0.497026	0.86456
FBgn0026592	38452	Fie	-0.315755	4.17641	3.2563	0.0711497	0.50514
FBgn0026593	48422	CG5707	-0.0711267	2.79124	0.0684691	0.793579	0.957294
FBgn0026597	43565	Axn	-0.131827	5.73815	1.41638	0.234001	0.708521
FBgn0026598	42871	Apc2	0.0611204	5.65168	0.28915	0.590765	0.899319
FBgn0026602	44750	Ady43A	0.210085	3.49633	1.03668	0.308596	0.759839
FBgn0026616	41913	alpha-Man-IIb	-0.830174	3.27702	12.1924	0.000479842	0.0369429
FBgn0026619	36405	Taz	0.00728374	5.10896	0.00330458	0.954158	0.991893
FBgn0026620	40589	tacc	-0.0176066	8.15635	0.0242927	0.876142	0.977812
FBgn0026630	40093	nes	0.0338139	6.27648	0.0783878	0.779494	0.955404
FBgn0026634	41870	ldlCp	-0.197593	4.39541	1.5204	0.217559	0.691475
FBgn0026666	32513	l(1)G0136	0.0355837	5.18792	0.0817168	0.774984	0.954318
FBgn0026679	31793	IntS4	-0.240136	6.04646	3.92729	0.0475083	0.437803
FBgn0026702	31475	l(1)G0045	0.0147243	4.40329	0.00887162	0.924959	0.985787
FBgn0026713	32373	l(1)G0007	0.0380588	7.37713	0.117215	0.732075	0.941359
FBgn0026718	34176	fu12	-0.120673	4.70968	0.568615	0.45081	0.843686
FBgn0026721	36919	fat-spondin	-0.242445	5.50494	3.79478	0.0514125	0.445219
FBgn0026722	35747	drosha	-0.0151054	5.52907	0.0152782	0.901628	0.984544
FBgn0026737	41872	CG6171	0.206081	3.63822	1.02834	0.310549	0.762108
FBgn0026738	39671	CG7857	0.102012	4.86496	0.478972	0.488888	0.863151
FBgn0026741	36406	mRpL18	-0.233329	5.4016	3.54096	0.0598709	0.473139
FBgn0026749	32295	Yippee	0.0243512	3.8441	0.0173738	0.895135	0.982322
FBgn0026751	31451	XRCC1	0.212015	6.2218	2.33446	0.126539	0.593056
FBgn0026753	42341	Vha13	0.432026	7.29314	13.5799	0.000228621	0.0256021
FBgn0026761	35559	Trap1	-0.0745667	6.48939	0.37505	0.540265	0.883142
FBgn0026777	43785	Rad23	0.0112419	5.68925	0.00983562	0.921	0.984719
FBgn0026787	33167	Nhe1	-0.0202635	4.63652	0.0182078	0.892662	0.981066
FBgn0026869	43796	Thd1	-0.198964	6.08709	2.90724	0.0881828	0.539163
FBgn0026872	31099	CG14777	-0.0877159	2.37715	0.0772629	0.781041	0.9555
FBgn0026873	31140	MED18	-0.0416948	4.56419	0.0765554	0.782021	0.955674
FBgn0026874	31029	CG13358	-0.222644	2.54744	0.568754	0.450754	0.843686
FBgn0026876	31072	CG11403	-0.235751	5.31837	2.85863	0.0908848	0.542229
FBgn0026879	50364	CG13364	0.531705	6.75606	19.7202	8.96469e-06	0.00373646
FBgn0027052	34433	CHIP	0.0531959	4.02314	0.0889473	0.76552	0.949003
FBgn0027053	42000	CSN5	-0.00168136	5.94299	0.000197267	0.988794	0.996417
FBgn0027054	35759	CSN4	-0.0790433	5.16889	0.366389	0.544979	0.885042
FBgn0027055	40308	CSN3	0.123163	5.95644	1.122	0.289487	0.749956
FBgn0027057	40063	CSN1b	-0.0858699	4.88619	0.267044	0.605322	0.902434
FBgn0027066	35584	Eb1	0.37483	8.58292	8.49305	0.00356505	0.124289
FBgn0027073	37420	CG4302	-0.255525	4.90002	2.66662	0.102474	0.562627
FBgn0027079	45783	Aats-val	-0.095988	6.95733	0.64068	0.423465	0.828889
FBgn0027080	39829	Aats-tyr	-0.101015	7.14021	0.749978	0.386483	0.808244
FBgn0027081	45784	Aats-thr	-0.036998	7.4081	0.111588	0.738344	0.942646
FBgn0027082	38331	Aats-pro	-0.352676	3.99306	3.85295	0.0496585	0.442116
FBgn0027083	41733	Aats-met	0.0699778	3.4485	0.0875731	0.767285	0.950395
FBgn0027084	31904	Aats-lys	0.0178132	8.08191	0.025552	0.872999	0.977307
FBgn0027085	38581	Aats-leu	-0.155769	4.4659	1.06369	0.302374	0.75655
FBgn0027086	45785	Aats-ile	-0.20877	6.97326	3.14531	0.0761455	0.517922
FBgn0027087	32841	Aats-his	-0.0512527	7.58906	0.217347	0.641069	0.914489
FBgn0027088	39644	Aats-gly	-0.1557	7.38728	1.92879	0.164891	0.647268
FBgn0027090	45786	Aats-gln	-0.0764343	6.95364	0.425327	0.514291	0.873404
FBgn0027091	36784	Aats-cys	-0.0804874	5.88054	0.52038	0.47068	0.85538
FBgn0027093	32539	Aats-arg	0.0509589	4.95425	0.116341	0.733037	0.941359
FBgn0027094	34156	Aats-ala	-0.165404	7.42168	2.27169	0.131757	0.600075
FBgn0027095	41983	Manf	0.12634	7.57554	1.33003	0.248799	0.721485
FBgn0027101	3885567	Dyrk3	0.013506	4.46367	0.00782258	0.929523	0.987127
FBgn0027103	42863	sec10	0.0135029	4.2442	0.00680458	0.934257	0.987503
FBgn0027108	31646	Inx2	-0.237449	2.72325	0.737048	0.390608	0.810361
FBgn0027111	38047	miple	0.176103	3.77586	0.810507	0.367971	0.800671
FBgn0027259	32102	Kmn1	0.122122	3.74693	0.417935	0.517969	0.875042
FBgn0027279	33137	l(1)G0196	-0.224165	5.98404	3.45687	0.0629895	0.479621
FBgn0027280	31712	l(1)G0193	-0.199079	7.73126	2.90088	0.0885314	0.539436
FBgn0027287	32483	Gmap	-0.0851707	6.7719	0.55579	0.455962	0.846074
FBgn0027291	32940	l(1)G0156	0.147028	8.43998	1.43219	0.231408	0.706742
FBgn0027296	31212	l(1)G0144	0.072476	4.18136	0.176883	0.674066	0.922767
FBgn0027329	32518	Tcp-1zeta	0.0192854	9.81449	0.0083131	0.927353	0.986338
FBgn0027330	31811	l(1)G0020	0.0438948	5.09574	0.106002	0.744742	0.944353
FBgn0027334	33033	l(1)G0004	0.388858	5.25666	8.4994	0.00355263	0.124289
FBgn0027335	32850	Rip11	0.103427	9.52164	0.295873	0.586481	0.899319
FBgn0027338	41158	Kap-alpha3	-0.0545036	7.46036	0.239223	0.624768	0.908162
FBgn0027339	43924	jim	-0.0374784	7.28224	0.0770363	0.781355	0.9555
FBgn0027342	31659	fz4	-0.274283	4.63763	2.93687	0.0865785	0.53702
FBgn0027356	36383	Amph	0.102028	4.23406	0.385423	0.534715	0.880585
FBgn0027359	32081	Tim8	0.290687	5.93028	5.66156	0.0173407	0.286082
FBgn0027363	34505	Stam	-0.0798728	6.22463	0.425362	0.514274	0.873404
FBgn0027375	39594	RecQ5	0.0390181	5.4949	0.107779	0.742687	0.944145
FBgn0027378	41850	MRG15	0.0472788	4.94928	0.12376	0.724992	0.940898
FBgn0027453	34503	Dnz1	0.129552	5.56916	1.31138	0.252145	0.722696
FBgn0027490	34172	D12	-0.191986	4.03748	1.16068	0.281324	0.74507
FBgn0027492	43312	wdb	0.311687	8.00327	7.01748	0.00807177	0.205423
FBgn0027493	42466	CG17273	-0.016833	9.4321	0.00856422	0.926267	0.985791
FBgn0027495	36299	CG8378	-0.0108087	5.84338	0.00920926	0.923548	0.985397
FBgn0027496	33908	epsilonCOP	-0.198214	5.24554	2.56196	0.109463	0.575011
FBgn0027497	40710	Madm	-0.00930481	6.51229	0.00622712	0.937103	0.988861
FBgn0027498	32042	CG2061	-0.265821	4.98923	3.94401	0.0470386	0.436705
FBgn0027499	36133	wde	-0.0136457	5.27519	0.012658	0.910421	0.984656
FBgn0027500	39850	spd-2	-0.133444	6.1485	1.25587	0.262434	0.732642
FBgn0027503	41072	CG11970	-0.153794	5.60449	1.81959	0.177362	0.659303
FBgn0027504	36302	CG8878	0.108203	6.0487	0.842999	0.358541	0.794163
FBgn0027505	34626	rab3-GAP	-0.14749	3.33206	0.395522	0.529411	0.878667
FBgn0027506	36959	EDTP	-0.0230224	5.09708	0.0302298	0.86197	0.97435
FBgn0027507	35500	CG1344	0.0472305	6.33235	0.135588	0.712707	0.937213
FBgn0027508	43095	tankyrase	-0.102233	5.25432	0.670457	0.412892	0.824769
FBgn0027509	33389	CG7261	-0.0722806	5.1884	0.31865	0.57242	0.895621
FBgn0027512	42793	CG10254	0.0447988	5.18592	0.116313	0.733068	0.941359
FBgn0027513	35878	ana2	-0.150378	4.96301	1.24821	0.263895	0.73307
FBgn0027514	40789	CG1024	-0.0290675	3.97196	0.0244585	0.875724	0.977812
FBgn0027515	34069	CG7115	0.10749	3.80151	0.291757	0.589097	0.899319
FBgn0027518	43505	CG7609	-0.105462	4.41319	0.473849	0.491222	0.863373
FBgn0027524	41226	CG3909	0.0618503	3.94931	0.115992	0.733423	0.941359
FBgn0027525	36146	CG7686	0.0543466	9.31055	0.0994201	0.752527	0.946388
FBgn0027526	42726	Ublcp1	-0.0195088	6.45511	0.0278534	0.867454	0.975407
FBgn0027529	37304	CG8920	-0.201625	7.21179	2.99452	0.0835469	0.531598
FBgn0027532	40448	CG7139	-0.0308906	6.04321	0.0704184	0.790729	0.956844
FBgn0027535	37198	botv	-0.293115	5.18806	5.24377	0.0220255	0.317983
FBgn0027537	32350	CG11092	-0.0959678	6.88008	0.705086	0.40108	0.817181
FBgn0027538	36585	beta4GalNAcTA	-0.0571726	3.68481	0.0696619	0.79183	0.957246
FBgn0027539	42956	CG5807	-0.416621	3.09001	2.95073	0.0858388	0.536701
FBgn0027547	38262	CG1927	0.0948375	7.41784	0.717561	0.396945	0.816988
FBgn0027548	35756	nito	-0.0761662	5.46642	0.404412	0.52482	0.876993
FBgn0027549	38897	CG7927	0.0149041	6.38445	0.0150788	0.902269	0.984656
FBgn0027550	34486	CG6495	0.0536262	4.64766	0.128804	0.719675	0.938635
FBgn0027552	38463	CG10863	-0.171111	7.08178	2.47002	0.116037	0.583401
FBgn0027553	31681	NELF-B	-0.236653	4.43673	2.21944	0.136282	0.606786
FBgn0027554	38886	CG8042	-0.0420302	5.60112	0.133817	0.714507	0.937678
FBgn0027556	32682	CG4928	0.409765	5.76532	14.0219	0.000180692	0.0226355
FBgn0027558	35627	pgant3	-0.10719	5.80391	0.935336	0.33348	0.779677
FBgn0027559	34892	Pol32	0.144548	4.83781	0.956559	0.328055	0.774362
FBgn0027561	35929	CG18659	0.0423061	7.28661	0.152355	0.696295	0.931372
FBgn0027564	31489	CG3149	-0.222936	4.03737	1.33538	0.247851	0.720924
FBgn0027565	40250	CG5498	-0.0949075	5.79571	0.751407	0.386031	0.808244
FBgn0027567	39161	CG8108	0.208722	7.11275	2.66647	0.102483	0.562627
FBgn0027568	34403	Cand1	-0.124648	5.70807	1.27125	0.259533	0.728803
FBgn0027569	38928	cert	-0.0674736	5.67394	0.359373	0.548855	0.885599
FBgn0027571	33524	CG3523	-0.183629	9.53498	0.918302	0.337921	0.78351
FBgn0027572	37028	CG5009	-0.281258	5.46448	5.1722	0.0229512	0.320924
FBgn0027574	43266	CG5815	-0.2107	4.28708	1.69604	0.192806	0.678785
FBgn0027575	42561	GABA-B-R2	-0.102688	2.87697	0.156337	0.692551	0.929899
FBgn0027579	43350	CG5508	-0.108526	5.93398	0.843543	0.358385	0.794163
FBgn0027580	36020	CG1516	-0.234238	6.92183	4.0525	0.044106	0.419319
FBgn0027581	36513	CG6191	-0.0700852	6.30958	0.325554	0.568289	0.894236
FBgn0027582	34546	CG6230	-0.0196389	6.22822	0.0262861	0.871204	0.976504
FBgn0027583	43502	CG7601	-0.194848	3.72552	1.04728	0.306134	0.759604
FBgn0027587	38032	CG7028	-0.138204	4.87392	0.918094	0.337976	0.78351
FBgn0027588	49953	CG14476	-0.200856	7.2363	3.06467	0.0800115	0.525492
FBgn0027590	37960	GstE12	-0.286565	7.15085	6.69538	0.00966629	0.222566
FBgn0027592	33223	MED15	-0.0914154	6.12539	0.565199	0.452173	0.843729
FBgn0027594	38218	drpr	-0.123841	6.19619	1.12474	0.2889	0.749956
FBgn0027596	36668	CG10249	-0.107015	6.37245	0.798787	0.371456	0.8026
FBgn0027597	33356	CG17712	-0.134644	4.05265	0.506028	0.476863	0.85713
FBgn0027598	43654	cindr	0.140935	8.93778	0.77031	0.380121	0.805337
FBgn0027599	37992	CG2790	0.34419	4.29647	3.13853	0.0764627	0.517922
FBgn0027601	32426	pdgy	-0.108814	6.43832	0.838924	0.359705	0.795267
FBgn0027602	32725	CG8611	0.15698	5.22936	1.42257	0.232981	0.70751
FBgn0027603	32910	Ulp1	-0.368101	5.62383	10.5003	0.00119358	0.0604228
FBgn0027605	32777	Vps4	0.0427667	7.45763	0.140757	0.70753	0.935752
FBgn0027607	35897	CG8230	-0.0964538	6.98311	0.763033	0.382381	0.805638
FBgn0027609	33648	morgue	-0.133857	3.51531	0.338031	0.560968	0.890499
FBgn0027610	41640	Dic1	0.107853	7.78873	0.852858	0.355745	0.791869
FBgn0027611	34437	LM408	-0.384132	5.60179	11.6218	0.000651843	0.044609
FBgn0027615	39222	CG6404	-0.0424152	3.94621	0.0323777	0.857201	0.97246
FBgn0027616	38420	YT521-B	-0.106651	7.00443	0.891409	0.345096	0.786737
FBgn0027617	42957	CG5808	0.182868	5.19232	2.13296	0.144162	0.618398
FBgn0027619	36037	Adam	0.40013	7.66312	13.0677	0.00030043	0.029237
FBgn0027620	43751	Acf1	0.201503	5.61511	2.61186	0.106067	0.569967
FBgn0027621	32938	Pfrx	0.0609884	5.69833	0.279639	0.596938	0.900767
FBgn0027654	43630	jdp	0.045296	3.53281	0.0491239	0.824595	0.962655
FBgn0027655	43392	htt	-0.182918	6.01882	2.50822	0.113254	0.580887
FBgn0027657	41930	glob1	-0.0362606	4.97307	0.0713953	0.789316	0.956844
FBgn0027660	39939	blot	-0.263376	3.40056	1.07665	0.299449	0.755028
FBgn0027779	34997	VhaSFD	-0.0184166	6.74119	0.0257208	0.872584	0.977307
FBgn0027780	34175	U26	-0.167174	3.56994	0.665718	0.414548	0.825586
FBgn0027783	36653	SMC2	0.159802	6.74534	1.64363	0.199828	0.680926
FBgn0027784	42285	Prp18	-0.0474235	3.20197	0.0367264	0.848023	0.969894
FBgn0027785	42282	NP15.6	0.1616	6.17334	1.61327	0.204033	0.683721
FBgn0027786	38026	Mtch	-0.0498637	6.2834	0.160783	0.688437	0.928931
FBgn0027791	31098	O-fut2	-0.0552875	6.40302	0.209403	0.647236	0.915564
FBgn0027793	31096	CG14787	-0.349126	4.53734	4.87331	0.0272752	0.340966
FBgn0027794	31095	CG14786	-0.136669	5.52764	1.2185	0.269655	0.73729
FBgn0027795	31094	CG14785	0.161472	3.48429	0.511986	0.474281	0.856385
FBgn0027835	37116	Dp1	-0.0701974	9.27253	0.168163	0.68175	0.925791
FBgn0027836	37080	Dgp-1	-0.109881	9.07747	0.484274	0.486493	0.862762
FBgn0027841	42239	CstF-64	0.000615726	4.70208	1.77789e-05	0.996636	0.998813
FBgn0027864	31806	Ogg1	0.319893	2.41717	1.08605	0.297348	0.754186
FBgn0027865	43127	Tsp96F	0.106052	6.62937	0.834368	0.361012	0.795778
FBgn0027866	40546	CG9776	0.0728913	7.28605	0.45694	0.499058	0.865147
FBgn0027868	34481	Nup107	-0.0720983	6.39222	0.362492	0.547125	0.885168
FBgn0027872	37011	rdgBbeta	0.110917	4.18289	0.438941	0.507634	0.870881
FBgn0027873	43426	Cpsf100	0.220335	5.42829	2.98092	0.0842515	0.53268
FBgn0027885	35053	Aac11	0.163348	6.90444	1.91572	0.16633	0.650578
FBgn0027889	43228	ball	-0.00548961	7.01077	0.00244431	0.960569	0.994076
FBgn0027903	38228	CG12018	-0.252588	5.40656	3.82093	0.0506162	0.445219
FBgn0027930	40541	MP1	-0.271362	6.52262	5.31806	0.0211055	0.313235
FBgn0027932	34170	Akap200	0.319875	9.67511	2.4952	0.114194	0.582487
FBgn0027936	NA	NA	0.131531	6.78767	1.31071	0.252266	0.722696
FBgn0027945	40349	ppl	0.0634872	5.19234	0.257193	0.612055	0.903565
FBgn0027948	41952	msps	-0.156711	7.30114	2.01107	0.156156	0.63694
FBgn0027949	35254	msb1l	-0.0315872	6.4536	0.0665881	0.796371	0.958928
FBgn0027950	41151	MBD-like	-0.247867	5.11705	3.70593	0.0542196	0.453632
FBgn0027951	40693	MTA1-like	0.0443147	6.5981	0.145321	0.703048	0.934126
FBgn0028274	31097	ns3	-0.137378	5.61295	1.48942	0.222306	0.69533
FBgn0028292	31874	ric8a	-0.151841	4.7079	1.05267	0.304894	0.759604
FBgn0028325	31406	l(1)G0334	0.04168	8.27062	0.117064	0.73224	0.941359
FBgn0028327	326234	l(1)G0320	0.0997732	8.767	0.518441	0.471507	0.85538
FBgn0028331	31964	l(1)G0289	-0.0659005	7.01721	0.301869	0.582713	0.898005
FBgn0028336	31605	l(1)G0255	0.0512627	7.87946	0.194839	0.65892	0.918189
FBgn0028341	31907	l(1)G0232	-0.0737635	5.41509	0.297971	0.585157	0.899275
FBgn0028342	31950	l(1)G0230	0.0428573	7.95452	0.135783	0.71251	0.937213
FBgn0028343	32732	l(1)G0222	-0.157819	7.47172	1.85582	0.173108	0.656799
FBgn0028360	31598	l(1)G0148	-0.103315	6.03004	0.748862	0.386837	0.808343
FBgn0028369	31292	kirre	0.355806	1.47705	0.66514	0.414751	0.825586
FBgn0028372	37261	isopeptidase-T-3	0.0379612	4.52288	0.0642628	0.799881	0.959579
FBgn0028373	44266	Inx3	-0.00776424	2.63066	0.000610684	0.980285	0.995778
FBgn0028375	34961	heix	0.0922252	4.59552	0.387663	0.533531	0.88001
FBgn0028380	43927	fal	0.0157121	5.73704	0.014635	0.903711	0.984656
FBgn0028382	36984	cyp33	0.123892	4.62633	0.702699	0.401878	0.817438
FBgn0028387	43928	chm	0.183257	3.64068	0.879619	0.348306	0.787839
FBgn0028394	34191	CG17834	-0.212092	2.84443	0.639636	0.423843	0.828889
FBgn0028397	32574	Tob	0.254459	3.88144	1.80924	0.1786	0.659697
FBgn0028398	33469	Taf10	0.13036	3.5607	0.398103	0.528071	0.878651
FBgn0028399	39827	TMS1	-0.190886	6.71779	2.75333	0.0970519	0.553653
FBgn0028401	41193	Snap24	0.17799	6.43071	2.24939	0.133667	0.602297
FBgn0028402	40325	Sin	-0.157469	5.23484	1.62502	0.202393	0.683604
FBgn0028406	34734	Drep-4	-0.398582	2.89186	2.3598	0.124498	0.59139
FBgn0028411	37769	Nxt1	0.131549	6.22202	0.974269	0.323618	0.770406
FBgn0028419	33859	Kr-h2	-0.0821607	6.47425	0.46203	0.496677	0.86456
FBgn0028420	33861	Kr-h1	-0.12209	5.40658	0.957673	0.327774	0.774362
FBgn0028421	32071	Kap3	-0.118149	4.8081	0.680262	0.409496	0.82289
FBgn0028424	36819	JhI-26	0.0520928	3.94319	0.0770239	0.781372	0.9555
FBgn0028425	34624	JhI-21	-0.130716	5.74899	1.36861	0.242051	0.716647
FBgn0028426	36086	JhI-1	-0.0764114	4.47441	0.247151	0.619088	0.905532
FBgn0028427	53573	Ilk	-0.0122565	5.85536	0.0118677	0.913251	0.984656
FBgn0028429	39156	I-2	0.0249087	6.33979	0.041297	0.838966	0.96691
FBgn0028430	117464	He	0.549042	5.45921	18.6191	1.59609e-05	0.00536214
FBgn0028434	36654	Ercc1	0.356441	4.38361	4.97016	0.0257883	0.334051
FBgn0028436	40732	ECSIT	0.126828	3.94109	0.497235	0.480717	0.858694
FBgn0028467	33932	CG11070	-0.115499	5.0781	0.807462	0.368872	0.800671
FBgn0028468	42500	rtet	-0.263465	5.58466	5.4538	0.0195258	0.301294
FBgn0028470	42058	Patr-1	-0.037293	6.12244	0.104674	0.746291	0.944429
FBgn0028471	42897	Nab2	-0.0801871	5.57217	0.508782	0.475667	0.856385
FBgn0028473	35963	CG8801	-0.0473157	11.1498	0.0197819	0.888148	0.979913
FBgn0028474	31481	CG4119	-0.0876264	6.10987	0.542045	0.461587	0.850986
FBgn0028475	42806	Hrd3	-0.18306	5.35654	2.21196	0.136945	0.608852
FBgn0028476	43462	CG15817	-0.109344	5.00584	0.686732	0.407278	0.821196
FBgn0028479	34276	Mtpalpha	-0.102124	6.42708	0.676211	0.410895	0.82346
FBgn0028480	31965	CG17841	-0.000655582	7.59902	3.51742e-05	0.995268	0.99839
FBgn0028484	38489	Ack	-0.215052	5.93988	3.39589	0.0653593	0.487175
FBgn0028487	41677	f-cup	-0.201745	4.35329	1.3135	0.251762	0.722696
FBgn0028490	34577	CG31705	-0.267808	7.68956	4.86816	0.0273566	0.340966
FBgn0028494	37012	CG6424	-0.0901278	7.10168	0.66633	0.414334	0.825586
FBgn0028497	37707	CG3530	-0.101452	6.11696	0.656813	0.417687	0.828152
FBgn0028499	42178	CG7985	-0.227427	4.71145	2.30738	0.128761	0.596043
FBgn0028500	40456	Rich	-0.138603	6.17679	1.40162	0.236452	0.711889
FBgn0028504	38324	CG12182	0.223459	2.10338	0.416727	0.518575	0.875193
FBgn0028506	34975	CG4455	0.102597	6.24171	0.580116	0.446267	0.839918
FBgn0028507	34928	CG3793	-0.291334	4.71087	3.74854	0.0528538	0.448499
FBgn0028509	34803	cenG1A	0.0164384	4.44483	0.011418	0.914904	0.984656
FBgn0028513	34773	CG9254	0.798365	2.04746	4.82979	0.027972	0.343423
FBgn0028514	34941	CG4793	-0.26357	1.32685	0.202424	0.652771	0.916071
FBgn0028515	34953	EndoGI	-0.0697805	5.82972	0.408384	0.522791	0.876337
FBgn0028523	34980	CG5888	-0.0138841	6.74056	0.0144932	0.904176	0.984656
FBgn0028530	34837	mTTF	0.0349642	3.36424	0.0162748	0.898487	0.983519
FBgn0028538	34785	sec71	-0.256949	5.31247	3.54405	0.0597595	0.473139
FBgn0028539	34783	CG31731	-0.3175	5.67659	7.925	0.00487564	0.15205
FBgn0028540	34779	CG9008	-0.541941	3.11031	4.57178	0.0325028	0.368448
FBgn0028541	34778	TM9SF4	-0.0537283	5.25434	0.192063	0.661205	0.919467
FBgn0028542	34814	nimB4	0.593883	1.57169	2.00774	0.156499	0.63694
FBgn0028546	34774	ics	-0.17516	4.54011	1.27507	0.258817	0.728175
FBgn0028550	43867	Atf3	0.136091	6.84878	1.10378	0.293437	0.751844
FBgn0028552	37842	gammaSnap	-0.152999	4.15133	0.841519	0.358963	0.794306
FBgn0028554	33967	x16	0.0515854	6.94775	0.216198	0.641953	0.914489
FBgn0028563	35774	sut1	-0.192031	5.67573	2.64733	0.103724	0.56411
FBgn0028572	33739	qtc	-0.189188	3.29618	0.704768	0.401186	0.817181
FBgn0028577	38173	pUf68	-0.0410353	7.93989	0.125765	0.722864	0.940576
FBgn0028579	35583	phtf	-0.183499	4.96408	1.81443	0.177977	0.659303
FBgn0028582	38846	lqf	0.0859588	6.71183	0.551836	0.457569	0.846955
FBgn0028646	43616	aralar1	-0.0562349	6.0697	0.231807	0.630187	0.909887
FBgn0028647	43070	CG11902	0.282205	3.66028	2.10487	0.146831	0.621376
FBgn0028648	38796	mRpL50	0.277501	3.92662	2.28162	0.130915	0.598757
FBgn0028662	45247	VhaPPA1-1	-0.0245177	7.98403	0.0444833	0.832957	0.966114
FBgn0028663	40389	VhaM9.7-b	0.266382	7.53111	5.79816	0.016043	0.276267
FBgn0028664	38503	VhaM9.7-c	-0.0162266	5.15963	0.0164919	0.897816	0.983303
FBgn0028665	31342	VhaAC39-1	0.110812	7.145	0.963999	0.326181	0.772694
FBgn0028670	42216	Vha100-2	-0.130472	7.31007	1.39258	0.237971	0.714122
FBgn0028671	43442	Vha100-1	-0.210002	6.29048	2.96714	0.0849717	0.53449
FBgn0028675	34350	Sur	-0.182786	3.58649	0.826742	0.363216	0.797629
FBgn0028683	36387	spt4	0.239463	5.1608	3.0814	0.0791921	0.524001
FBgn0028684	42805	Tbp-1	0.0131448	6.66559	0.0129036	0.90956	0.984656
FBgn0028685	31567	Rpt4	-0.117449	6.91684	1.02378	0.311623	0.76341
FBgn0028686	32047	Rpt3	-0.141766	7.63202	1.65487	0.198297	0.680172
FBgn0028687	35701	Rpt1	-0.120556	7.22109	1.16185	0.281082	0.74507
FBgn0028688	42641	Rpn7	-0.103056	6.18576	0.816846	0.366104	0.799638
FBgn0028689	36638	Rpn6	0.0242412	6.45304	0.0420503	0.837524	0.966114
FBgn0028690	40717	Rpn5	0.141117	6.89665	1.57406	0.209619	0.686743
FBgn0028691	42802	Rpn9	-0.0470655	6.66299	0.159059	0.690025	0.929243
FBgn0028692	43449	Rpn2	0.158446	7.49911	1.84441	0.174435	0.658046
FBgn0028693	39845	Rpn12	0.0445854	6.49042	0.143317	0.705005	0.935169
FBgn0028694	33738	Rpn11	0.0405585	7.07168	0.124618	0.724079	0.940898
FBgn0028695	40174	Rpn1	-0.189026	7.5487	2.97284	0.0846732	0.533521
FBgn0028697	3354918	RpL15	0.124344	11.941	0.0902507	0.763859	0.94865
FBgn0028700	34550	RfC38	-0.216897	4.21266	1.56997	0.210212	0.686793
FBgn0028703	33939	Nhe3	-0.164695	4.17324	0.967589	0.325282	0.771953
FBgn0028707	34632	Mt2	-0.295739	1.28934	0.36646	0.54494	0.885042
FBgn0028708	41089	Mst85C	-0.238831	4.92979	2.87133	0.0901701	0.541425
FBgn0028717	43130	Lnk	-0.0107828	5.66161	0.0091994	0.923589	0.985397
FBgn0028734	37528	Fmr1	0.289988	8.3313	5.74479	0.0165377	0.281636
FBgn0028737	45249	Ef1beta	0.0613314	10.3342	0.0566475	0.811875	0.962102
FBgn0028743	37037	CG5036	-0.123107	6.60758	0.887112	0.346261	0.787633
FBgn0028744	37036	CG5033	-0.0284867	5.49391	0.0432059	0.835338	0.966114
FBgn0028746	59253	CG18508	0.176757	3.98315	0.9861	0.320697	0.769941
FBgn0028833	43165	Dak1	0.0521954	7.41471	0.206617	0.649432	0.915564
FBgn0028836	35816	CSN7	0.0105763	4.99318	0.00625026	0.936986	0.988861
FBgn0028837	42661	CSN6	-0.00673925	5.47594	0.00315987	0.955172	0.992322
FBgn0028856	34943	CG18063	0.132867	3.97325	0.495655	0.481415	0.859454
FBgn0028894	34963	CG5869	0.188997	4.66923	1.61386	0.20395	0.683721
FBgn0028895	34962	CG17328	-0.613782	1.84387	2.35295	0.125046	0.591994
FBgn0028897	34955	CG4935	0.465867	1.36251	1.05365	0.304669	0.759462
FBgn0028916	34835	CG33090	-0.197567	3.5066	0.893801	0.344449	0.786737
FBgn0028919	34788	CG16865	0.230462	3.34946	1.10529	0.293109	0.751844
FBgn0028926	34875	NC2beta	0.112642	4.306	0.500738	0.479176	0.858694
FBgn0028931	34784	CG16863	-0.0726314	3.50269	0.114937	0.734592	0.941359
FBgn0028932	34781	CG16890	0.497607	3.22617	4.7453	0.0293784	0.353274
FBgn0028936	34815	nimB5	0.509324	5.16688	10.4001	0.00126009	0.0620889
FBgn0028952	48440	Kebab	-0.372464	2.34529	0.828168	0.362803	0.797629
FBgn0028953	36964	CG14478	0.118381	7.21961	0.99959	0.31741	0.769151
FBgn0028954	NA	NA	-0.1014	6.94907	0.834368	0.361012	0.795778
FBgn0028955	35932	CG8788	-0.0218827	4.40167	0.0199441	0.887693	0.979913
FBgn0028956	36961	mthl3	0.129174	5.2556	1.09496	0.295374	0.752296
FBgn0028961	44126	AlstR	0.993815	2.18855	8.21844	0.00414668	0.139946
FBgn0028962	38595	Aats-ala-m	-0.166046	4.60678	1.24049	0.265377	0.733915
FBgn0028965	34700	A16	0.148988	5.433	1.54395	0.214031	0.688432
FBgn0028968	43717	gammaCop	-0.262521	6.4912	5.00121	0.0253296	0.331347
FBgn0028969	45250	deltaCOP	-0.139849	7.28489	1.67873	0.195093	0.678891
FBgn0028970	47757	betaggt-II	-0.174855	4.53226	1.31097	0.25222	0.722696
FBgn0028974	44271	xmas-2	-0.22941	4.88045	2.75565	0.0969111	0.553653
FBgn0028978	43999	trbl	-0.0901901	6.74821	0.622135	0.430255	0.832641
FBgn0028979	44272	tio	-0.47931	1.25777	1.03366	0.3093	0.760237
FBgn0028980	44785	tan	0.0889295	3.69209	0.183911	0.668033	0.921163
FBgn0028982	44000	Spt6	-0.14628	7.16889	1.64489	0.199656	0.680743
FBgn0028983	49803	Spn55B	-0.242259	5.15402	3.39518	0.0653873	0.487175
FBgn0028984	49804	Spn88Ea	-0.158058	5.48285	1.71119	0.19083	0.673858
FBgn0028985	NA	NA	-0.192217	5.52427	2.56413	0.109313	0.575011
FBgn0028988	49808	Spn42Dd	-0.130622	3.65154	0.353366	0.552214	0.88765
FBgn0028990	45815	Spn27A	-0.17247	5.25268	1.90784	0.167204	0.650578
FBgn0028991	3772396	seq	-0.308023	4.244	3.23517	0.0720728	0.506841
FBgn0028992	42091	sds22	-0.0043957	6.00819	0.00143091	0.969825	0.994076
FBgn0028997	41174	nmdyn-D7	0.026536	4.85302	0.0361723	0.84916	0.969894
FBgn0029002	44787	miple2	0.076794	7.11039	0.469662	0.493143	0.863373
FBgn0029006	36999	lack	-0.0990469	6.07603	0.692915	0.405175	0.820202
FBgn0029067	33107	Dd	0.219079	5.62946	3.7837	0.0517541	0.445821
FBgn0029079	36997	icln	0.00295856	4.66952	0.000395091	0.984142	0.996417
FBgn0029088	44274	disp	-0.187567	5.43755	2.28722	0.130443	0.59808
FBgn0029092	35971	ced-6	0.102382	8.28955	0.755615	0.384704	0.807376
FBgn0029093	45268	cathD	-0.242081	7.85157	4.16171	0.0413476	0.412088
FBgn0029094	40141	asf1	-0.119124	6.69601	1.00337	0.316497	0.76822
FBgn0029095	33268	aru	-0.201691	7.73028	3.1642	0.0752691	0.517922
FBgn0029113	44496	Uba2	0.00139598	6.99113	0.000160707	0.989885	0.996417
FBgn0029114	44497	Tollo	0.291794	5.45934	5.79789	0.0160455	0.276267
FBgn0029117	44498	Surf1	0.356264	3.1681	2.31237	0.128348	0.596043
FBgn0029118	44001	Sucb	-0.10821	5.96164	0.868215	0.35145	0.790061
FBgn0029121	44002	Sras	-0.080118	3.46852	0.133433	0.714899	0.937678
FBgn0029123	44275	SoxN	0.297321	1.53939	0.500846	0.479129	0.858694
FBgn0029128	3354987	tyn	0.34818	6.00332	4.57723	0.0323996	0.368448
FBgn0029131	53585	debcl	0.072734	6.75242	0.366063	0.545158	0.885042
FBgn0029133	32274	REG	0.091141	7.77318	0.607955	0.435559	0.837247
FBgn0029134	45269	Prosbeta5	-0.02382	7.31509	0.0464437	0.829371	0.965336
FBgn0029137	34634	Patsas	-0.537645	1.87934	1.98171	0.15921	0.641266
FBgn0029147	43935	NtR	-0.347125	5.62656	8.53565	0.00348256	0.12257
FBgn0029148	44005	NHP2	0.0255586	6.06077	0.0467707	0.828781	0.965105
FBgn0029152	44131	Mkrn1	0.163312	6.32104	1.75112	0.185736	0.668342
FBgn0029155	43936	Men-b	-0.0325115	7.67945	0.0862222	0.769036	0.950898
[truncated: 5,392 more rows]
